# Supplementary material
Source: ML conference proceedings conference paper supplement (https://openreview.net/forum?id=0xFgYI6oZr)
Supplement: supplementary_material [file appendix.pdf › appendix.pdf]

# Appendix

## A Preliminaries

This section is organized as follows. In Section A.1, we provide some technical tools in probability theory and linear algebra. In Section A.2, we review the Fourier transformation for different types of signals. And in Section B.3, we discuss the importance sampling method.

### A.1 Tools and inequalities

**Lemma A.1** (Chernoff Bound [Chernoff \(1952\)](#)). *Let  $X_1, X_2, \dots, X_n$  be independent random variables. Assume that  $0 \leq X_i \leq 1$  always, for each  $i \in [n]$ . Let  $X = X_1 + X_2 + \dots + X_n$  and  $\mu = \mathbb{E}[X] = \sum_{i=1}^n \mathbb{E}[X_i]$ . Then for any  $\varepsilon > 0$ ,*

$$\Pr[X \geq (1 + \varepsilon)\mu] \leq \exp(-\frac{\varepsilon^2}{2 + \varepsilon}\mu) \text{ and } \Pr[X \leq (1 - \varepsilon)\mu] \leq \exp(-\frac{\varepsilon^2}{2}\mu).$$

**Definition A.2** ( $\varepsilon$ -net). *Let  $T$  be a metric space with distance measure  $d$ . Consider a subset  $K \subset T$  and let  $\varepsilon > 0$ . A subset  $\mathcal{N} \subseteq K$  is called an  $\varepsilon$ -net of  $K$  if every point in  $K$  is within distance  $\varepsilon$  of some point of  $\mathcal{N}$ , i.e.*

$$\forall x \in K, \exists y \in \mathcal{N} \text{ s.t. } d(x, y) \leq \varepsilon.$$

**Fact A.3** (Fast matrix multiplication). *We use  $\mathcal{T}_{\text{mat}}(a, b, c)$  to denote the time of multiplying an  $a \times b$  matrix with another  $b \times c$  matrix.*

*We use  $\omega$  to denote the exponent of matrix multiplication, i.e.,  $\mathcal{T}_{\text{mat}}(n, n, n) = n^\omega$ . Currently  $\omega \approx 2.373$  [Williams \(2012\)](#); [Le Gall \(2014\)](#); [Alman and Williams \(2021\)](#).*

**Fact A.4** (Weighted linear regression). *Given a matrix  $A \in \mathbb{C}^{n \times d}$ , a vector  $b \in \mathbb{C}^n$  and a weight vector  $w \in \mathbb{R}_{>0}^n$ , it takes  $O(nd^{\omega-1})$  time to output an  $x'$  such that*

$$x' = \arg \min_x \|\sqrt{W}(Ax - b)\|_2 = (A^*WA)^{-1}A^*Wb.$$

*where  $\sqrt{W} := \text{diag}(\sqrt{w_1}, \dots, \sqrt{w_n}) \in \mathbb{R}^{n \times n}$ , and  $\omega \approx 2.373$  is the exponent of matrix multiplication [Williams \(2012\)](#); [Le Gall \(2014\)](#); [Alman and Williams \(2021\)](#).*

**Fact A.5.** *For any  $x \in (0, 1)$ , we have  $\cos(x) \leq \exp(-x^2/2)$ .*

### A.2 Basics of Fourier transformation

The definition of high dimensional Fourier transform is as follows:

$$\hat{x}(f) = \int_{(-\infty, \infty)^d} x(t) \exp(-2\pi i \langle f, t \rangle) dt, \text{ where } f \in \mathbb{R}^d,$$

and the definition of high dimensional inverse Fourier transform is as follows:

$$x(t) = \int_{(-\infty, \infty)^d} \hat{x}(f) \exp(2\pi i \langle f, t \rangle) df, \text{ where } t \in \mathbb{R}^d.$$

Note that when we replace  $d = 1$  in the definition of high dimensional Fourier transform and inverse Fourier transform above, we get the definition of one-dimensional Fourier transform and inverse Fourier transform.

The definition of discrete Fourier transform is as follows:

$$\hat{x}_f = \sum_{t=1}^n x_t \exp(-2\pi i f t / n), \text{ where } f \in [n],$$

and the definition of discrete inverse Fourier transform is as follows:

$$x_t = \frac{1}{n} \sum_{f=1}^n \hat{x}_f \exp(2\pi i f t / n), \text{ where } t \in [n].$$

767 A continuous  $k$ -Fourier sparse signal  $x(t) : \mathbb{R}^d \rightarrow \mathbb{C}$  can be represented as follows:

$$x(t) = \sum_{j=1}^k v_j \exp(2\pi i \langle f_j, t \rangle), \quad v_j \in \mathbb{C}, f_j \in \mathbb{R}^d, \forall j \in [k].$$

768 Thus,  $\widehat{x}(f)$  is:

$$\widehat{x}(f) = \sum_{j=1}^k v_j \delta(t - f_j).$$

769 A discrete  $k$ -Fourier sparse signal  $x \in \mathbb{C}^n$  can be represented as follows:

$$x_t = \sum_{j \in S} v_j \exp(2\pi i j t / n), \quad S \subseteq [n], |S| = k, v_j \in \mathbb{C}, \forall j \in S.$$

770 So,  $\widehat{x}_f$  is:

$$\widehat{x}_f = \begin{cases} v_j & , j \in S \\ 0 & , \text{o.w.} \end{cases}$$

## 771 B Definitions of Semi-Continuous Fourier Set Query and Interpolation

772 In this section, we give the formal definitions of the problems studied in this paper. In Section B.1,  
773 we define the Fourier set query for discrete and continuous signals. In Section B.2, we define  
774 the band-limited interpolation problem and its two sub-problems: frequency estimation and signal  
775 estimation.

### 776 B.1 Formal definitions of Fourier set query

777 The discrete Fourier set query problem is defined as follows:

778 **Definition B.1** (Discrete Fourier set query problem). *Let  $x \in \mathbb{C}^n$  and  $\widehat{x}$  be its discrete Fourier*  
779 *transformation. Let  $\varepsilon > 0$ . Given a set  $S \subseteq [n]$  and query access to  $x$ , the goal is to use a few queries*  
780 *to compute a vector  $x'$  with support  $\text{supp}(x') \subseteq S$  such that*

$$\|(x' - \widehat{x})_S\|_2^2 \leq \varepsilon \cdot \|\widehat{x}_{[n] \setminus S}\|_2^2.$$

781 We also define the continuous Fourier set query problem as follows:

782 **Definition B.2** (Continuous Fourier set query problem). *For  $d \geq 1$ , let  $x^*(t)$  be a signal in time*  
783 *duration  $[0, T]^d$ . Let  $\widehat{x}^*(f)$  denote the continuous Fourier transformation of  $x^*(t)$ . Let  $\varepsilon > 0$ . Given a*  
784 *set  $S \subseteq \mathbb{R}^d$  of frequencies such that  $\text{supp}(\widehat{x}^*) \subseteq S$ , and observations of the form  $x(t) = x^*(t) + g(t)$ ,*  
785 *where  $g(t)$  denotes the noise. The goal is to output a Fourier-sparse signal  $x'(t)$  with support*  
786  *$\text{supp}(x') \subseteq S$  such that*

$$\|x' - x^*\|_T^2 \leq (1 + \varepsilon) \cdot \|g\|_T^2.$$

### 787 B.2 Formal definitions of semi-continuous band-limited interpolation

788 In this section, we provide the following formal definition of the semi-continuous band-limited  
789 interpolation problem, where we assume that the frequencies of the signal are contained in a lattice.

790 **Problem B.3** (Semi-continuous band-limited interpolation problem). *Given a basis  $\mathcal{B}$  of  $m$  known*  
791 *vectors  $b_1, b_2, \dots, b_m \in \mathbb{R}^d$ , let  $\Lambda(\mathcal{B}) \subset \mathbb{R}^d$  denote the lattice*

$$\Lambda(\mathcal{B}) = \left\{ z \in \mathbb{R}^d : z = \sum_{i=1}^m c_i b_i, c_i \in \mathbb{Z}, \forall i \in [m] \right\}$$

792 *Suppose that  $f_1, f_2, \dots, f_k \in \Lambda(\mathcal{B})$ ,  $\forall i \in [k]$ ,  $|f_i| \leq F$ . Let  $x^*(t) = \sum_{j=1}^k v_j e^{2\pi i \langle f_j, t \rangle}$ , and*  
793 *let  $g(t)$  denote the noise. Given observations of the form  $x(t) = x^*(t) + g(t)$ ,  $t \in [0, T]^d$ . Let*  
794  *$\eta = \min_{i \neq j} \|f_j - f_i\|_\infty$ . There are three goals:*

795 1. The first goal is to design an algorithm that output  $f_1, f_2, \dots, f_k$  exactly given query access  
 796 to the signal  $x(t)$  for  $t \in [0, T]^d$ .

797 2. The second goal is to design an algorithm that output a set  $L$  of frequencies such that, for  
 798 each  $f_i$ , there is  $f'_i \in L$ ,  $\|f_i - f'_i\|_2 \leq D/T$ .

799 3. The third goal is to design an algorithm that output  $y(t) = \sum_{j=1}^{\tilde{k}} v'_j \cdot e^{2\pi i f'_j t}$  such that  
 800  $\int_{[0, T]^d} |y(t) - x(t)|^2 dt \lesssim \int_{[0, T]^d} |g(t)|^2 dt$ .

801 Then, we extract two sub-problems from Problem B.3: Frequency Estimation and Signal Estimation.  
 802 We give their definitions below.

803 We first define the  $d$ -dimensional frequency estimation under the semi-continuous as follows. In this  
 804 problem, we want to recover each frequencies in a small range.

805 **Problem B.4** (Frequency estimation). Given a basis  $\mathcal{B}$  of  $m$  known vectors  $b_1, b_2, \dots, b_m \in \mathbb{R}^d$ , let  
 806  $\Lambda(\mathcal{B}) \subset \mathbb{R}^d$  denote the lattice

$$\Lambda(\mathcal{B}) = \left\{ z \in \mathbb{R}^d : z = \sum_{i=1}^m c_i b_i, c_i \in \mathbb{Z}, \forall i \in [m] \right\}$$

807 Suppose that  $f_1, f_2, \dots, f_k \in \Lambda(\mathcal{B})$ . Let  $x^*(t) = \sum_{j=1}^k v_j e^{2\pi i \langle f_j, t \rangle}$ , and let  $g(t)$  denote the noise.  
 808 Given observations of the form  $x(t) = x^*(t) + g(t)$ ,  $t \in [0, T]^d$ . Let  $\eta = \min_{i \neq j} \|f_j - f_i\|_\infty$ .

809 The goal is to design an algorithm that output a set  $L$  of frequencies such that, for each  $f_i$ , there is  
 810  $f'_i \in L$ ,  $\|f_i - f'_i\|_2 \leq D/T$ .

811 We remark that the recovered frequencies in  $L$  are not necessary to be in  $\Lambda(\mathcal{B})$ , and  $D$  is a parameter  
 812 that can depend on  $k$ .

813 Next, we define the  $d$ -dimensional Signal Estimation under the semi-continuous setting as follows.  
 814 In this problem, we want to recover a signal that can approximate the ground-truth signal in the time  
 815 domain.

816 **Problem B.5** (Signal Estimation problem). Given a basis  $\mathcal{B}$  of  $m$  known vectors  $b_1, b_2, \dots, b_m \in \mathbb{R}^d$ ,  
 817 let  $\Lambda(\mathcal{B}) \subset \mathbb{R}^d$  denote the lattice

$$\Lambda(\mathcal{B}) = \left\{ z \in \mathbb{R}^d : z = \sum_{i=1}^m c_i b_i, c_i \in \mathbb{Z}, \forall i \in [m] \right\}$$

818 Suppose that  $f_1, f_2, \dots, f_k \in \Lambda(\mathcal{B})$ . Let  $x^*(t) := \sum_{j=1}^k v_j e^{2\pi i \langle f_j, t \rangle}$ , and let  $g(t)$  denote the noise.  
 819 Given observations of the form  $x(t) = x^*(t) + g(t)$ ,  $t \in [0, T]^d$ . Let  $\eta = \min_{i \neq j} \|f_j - f_i\|_\infty$ .

The goal is to design an algorithm that outputs  $y(t) = \sum_{j=1}^{\tilde{k}} v'_j \cdot e^{2\pi i f'_j t}$  such that

$$\int_{[0, T]^d} |y(t) - x(t)|^2 dt \lesssim \int_{[0, T]^d} |g(t)|^2 dt.$$

820 Note that outputting  $y(t) = \sum_{j=1}^{\tilde{k}} v'_j \cdot e^{2\pi i f'_j t}$  means outputting  $\{v'_j, f'_j\}_{j \in [\tilde{k}]}$ .

821 **Remark B.6.** We note that given the solution of Frequency Estimation (Problem B.4), Signal  
 822 Estimation (Problem B.5) can be formulated as a Fourier set query problem (Problem B.2). More  
 823 specifically, by Frequency Estimation, we will find a set that contains all frequencies of the ground  
 824 truth signal  $x^*(t)$ . Then, we only need to recover the coefficients with frequencies in this set, which is  
 825 equivalent to a set query problem.

### 826 B.3 Facts about importance sampling

827 Important sampling try to estimate a statistic value in one distribution by taking samples in another  
 828 distribution. In particular, [Chen and Price \(2019a\)](#) considered the importance sampling for estimating  
 829 the norm of functions in a linear family  $\mathcal{F}$ .

830 In this followings, we first provide some basic definitions about linear function family.

**Definition B.7** (Condition number of sampling distribution). *Let  $G$  be any domain and  $\mathcal{F}$  is a linear function family from  $G$  to  $\mathbb{C}$ . Let  $D$  be an arbitrary distribution over  $G$ . Then the condition number of  $D$  with respect to  $\mathcal{F}$  is defined as follows:*

$$K_D := \sup_{t \in G} \sup_{f \in \mathcal{F}} \frac{|f(t)|^2}{\|f\|_D^2},$$

where

$$\|f\|_D^2 := \int_G D(t) \cdot |f(t)|^2 dt.$$

**Definition B.8** (Orthonormal basis for linear function family). *Let  $G$  be any domain. Given a linear function family  $\mathcal{F}$  from  $G$  to  $\mathbb{C}$ , and a probability distribution  $D$  over  $G$ . We say  $\{v_1, \dots, v_d\}$  form an orthonormal basis of  $\mathcal{F}$  with respect to  $D$ , if they satisfy the following properties:*

- for any  $i, j \in [d]$ ,  $\int_G D(t) v_i(t) \overline{v_j(t)} dt = \mathbf{1}_{i=j}$ , and
- for any  $f \in \mathcal{F}$ ,  $f \in \text{span}\{v_1, \dots, v_d\}$ .

**Fact B.9.** *Let  $\{v_1, \dots, v_k\}$  be an orthonormal basis of  $\mathcal{F}$  with respect to  $D$ . For any function  $f \in \mathcal{F}$ , let  $\alpha(f)$  denote the coefficients under the basis  $\{v_1, \dots, v_d\}$ , i.e.,  $h = \sum_{i=1}^d \alpha(h)_i \cdot v_i$ . Then,*

$$\|\alpha(h)\|_2 = \|h\|_D.$$

For an unknown function  $f \in \mathcal{F}$ , the goal of importance sampling is to estimate  $\|f\|_D$ , given samples from another distribution  $D'$ . The following definition introduces the importance sampling procedure and condition number of the importance sampling distribution.

**Definition B.10** (Definition 3.1 of [Chen and Price \(2019a\)](#)). *For any unknown distribution  $D'$  over the domain  $G$  and any function  $f \in \mathcal{F}$ , let  $f^{(D')}(t) := \sqrt{\frac{D(t)}{D'(t)}} \cdot f(t)$  be the importance sampling function for some known distribution  $D$  such that*

$$\mathbb{E}_{t \sim D'} [ |f^{(D')}(t)|^2 ] = \mathbb{E}_{t \sim D'} \left[ \frac{D(t)}{D'(t)} |f(t)|^2 \right] = \mathbb{E}_{t \sim D} [ |f(t)|^2 ].$$

Then, we can use samples from  $D'$  to estimate  $\|f^{(D')}\|_{D'}$ , which gives an estimate of  $\|f\|_D$ .

When the family  $\mathcal{F}$  and  $D$  is clear, we use  $K_{\text{IS}, D'}$  to denote the condition number of importance sampling from  $D'$ :

$$K_{\text{IS}, D'} = \sup_{t \sim D'} \left\{ \sup_{f \in \mathcal{F}} \left\{ \frac{|f^{(D')}(t)|^2}{\|f^{(D')}\|_{D'}^2} \right\} \right\} = \sup_t \left\{ \frac{D(t)}{D'(t)} \cdot \sup_{f \in \mathcal{F}} \left\{ \frac{|f(t)|^2}{\|f\|_D^2} \right\} \right\}. \quad (5)$$

From Definition B.10, we know that the efficiency of importance sampling depends on how many samples we need to estimate  $\|f^{(D')}\|_{D'}$ . The following lemma provide a criteria for judging whether a set of samples gives a good estimation for the norm of function.

**Lemma B.11** (Lemma 4.2 in [Chen and Price \(2019a\)](#)). *For any  $\varepsilon \in (0, 1)$ , let  $S = \{t_1, \dots, t_s\}$  and the weight vector  $w \in \mathbb{R}_{>0}^s$ . Define a matrix  $A \in \mathbb{R}^{s \times d}$  be the  $s \times d$  matrix defined as  $A_{i,j} = \sqrt{w_i} \cdot v_j(t_i)$ , where  $\{v_1, \dots, v_d\}$  is an orthonormal basis for  $\mathcal{F}$ . Then*

$$\|h\|_{S,w}^2 := \sum_{j=1}^s w_j \cdot |h(x_j)|^2 \in [1 \pm \varepsilon] \cdot \|h\|_D^2 \quad \text{for every } h \in \mathcal{F}$$

if and only if the eigenvalues of  $A^* A$  are in  $[1 - \varepsilon, 1 + \varepsilon]$ .

The following lemma shows that the sample complexity depends on the condition number  $K_{\text{IS}, D'}$ :

**Lemma B.12** (Lemma 6.6 in [Chen and Price \(2019a\)](#)). *Let  $D'$  be an arbitrary distribution over  $G$  and let  $K_{\text{IS}, D'}$  be the condition number of importance sampling from  $D'$  (defined by Eq. (5)). There exists an absolute constant  $C$  such that for any  $\varepsilon \in (0, 1)$  and  $\delta \in (0, 1)$ , let  $S = \{t_1, \dots, t_s\}$  be a set of i.i.d. samples from the distribution  $D'$  and let  $w$  be the weight vector defined by  $w_j = \frac{D(t_j)}{s \cdot D'(t_j)}$  for each  $j \in [s]$ . Then, as long as*

$$s \geq \frac{C}{\varepsilon^2} \cdot K_{\text{IS}, D'} \log \frac{d}{\delta},$$

the  $s \times d$  matrix  $A_{i,j} = \sqrt{w_i} \cdot v_j(t_i)$  satisfies

$$\|A^* A - I\|_2 \leq \varepsilon \text{ with probability at least } 1 - \delta.$$

## C Energy Bounds for Band-limited Signals

The energy bound shows that the maximum value of a band-limited signal in a certain interval can be bounded by its energy on the interval. One interesting fact is that the approximation ratio in the energy bound is only relate to the sparsity  $k$ , and have no relationship with time duration  $T$  and band-limit  $F$ . An application of energy bound is preserving the norm, that is what is the least size of set  $S$ , such that  $\|f\|_S = \|f\|_T$ , for any function  $f$  in a certain function family. The relationship between energy bound and norm preserving can be build by Chernoff bound.

Borwein and Erdélyi (2006); Kós (2008); Chen et al. (2016); Chen and Price (2019b) proved energy bounds for sparse Fourier signal under one-dimensional continuous Fourier transform. We further generalize these results to discrete band-limited signal under discrete Fourier transform and high-dimensional band-limited signal under continuous Fourier transform.

This section is organized as follows:

- Section C.1 reviews previous results for one-dimensional continuous Fourier-sparse signals.
- Section C.2 builds the connection between energy bound and the concentration property.

### C.1 Energy bound for one-dimensional signals

In this section, we review the energy bound proved in prior work Borwein and Erdélyi (2006); Kós (2008); Chen et al. (2016); Chen and Price (2019b).

Kós (2008) proved the following energy bound:

**Theorem C.1** (Kós (2008); Chen et al. (2016)). *Define a family of  $F$ -band-limit,  $k$ -sparse Fourier signals:*

$$\mathcal{F} := \left\{ x(t) = \sum_{j=1}^k v_j \cdot e^{2\pi i f_j t} \mid f_j \in \mathbb{R} \cap [-F, F] \right\}$$

Then, for any  $t \in (-1, 1)$ ,

$$\sup_{x \in \mathcal{F}} \frac{|x(t)|^2}{\|x\|_D^2} \lesssim k^2.$$

Borwein and Erdélyi (2006) also proved a time-dependent energy bound for one-dimensional signal:

**Theorem C.2** (Borwein and Erdélyi (2006); Chen and Price (2019a)). *Define a family of  $F$ -band-limit,  $k$ -sparse Fourier signals:*

$$\mathcal{F} := \left\{ x(t) = \sum_{j=1}^k v_j \cdot e^{2\pi i f_j t} \mid f_j \in \mathbb{R} \cap [-F, F] \right\}$$

Then, for any  $t \in (-1, 1)$ ,

$$\sup_{x \in \mathcal{F}} \frac{|x(t)|^2}{\|x\|_D^2} \lesssim \frac{k}{1 - |t|}.$$

### C.2 Energy bounds imply concentrations

By using Chernoff bound, we prove the following lemma to show the performance of uniformly sampling.

#### C.2.1 Continuous case

**Lemma C.3.** *Let  $d \in \mathbb{Z}_+$ . Let  $R$  be a parameter. Given any function  $x(t) : \mathbb{R}^d \rightarrow \mathbb{C}$  with  $\max_{t \in [0, T]^d} |x(t)|^2 \leq R \|x(t)\|_T^2$ . Let  $S$  denote a set of points chosen uniformly at random from  $[0, T]^d$ .*

*We have that*

$$\Pr \left[ \left| \frac{1}{|S|} \sum_{i \in S} |x(t_i)|^2 - \|x(t)\|_T^2 \right| \geq \varepsilon \|x(t)\|_T^2 \right] \leq \exp(-\Omega(\varepsilon^2 |S|/R)),$$

892 where  $\|x(t)\|_T^2 = \frac{1}{T^d} \int_{[0,T]^d} |x(t)|^2 dt$ .

893 *Proof.* Let  $M$  denote  $\max_{t \in [0,T]^d} |x(t)|^2$ . Replacing  $X_i$  by  $\frac{|x(t_i)|^2}{M}$  and  $n$  by  $|S|$  in Lemma A.1, we obtain  
894 that

$$\Pr[|X - \mu| > \varepsilon \mu] \leq 2 \exp(-\frac{\varepsilon^2}{3} \mu)$$

895 The above equation implies

$$\Pr \left[ \left| \sum_{i \in S} \frac{|x(t_i)|^2}{M} - |S| \frac{\|x(t)\|_T^2}{M} \right| > \varepsilon |S| \frac{\|x(t)\|_T^2}{M} \right] \leq 2 \exp(-\frac{\varepsilon^2}{3} \mu)$$

896 Multiplying  $M$  on the both sides

$$\Pr \left[ \left| \frac{1}{|S|} \sum_{i \in S} |x(t_i)|^2 - \|x(t)\|_T^2 \right| \geq \varepsilon \|x(t)\|_T^2 \right] \leq 2 \exp(-\frac{\varepsilon^2}{3} \mu)$$

897 Applying bound on  $\mu$

$$\Pr \left[ \left| \frac{1}{|S|} \sum_{i \in S} |x(t_i)|^2 - \|x(t)\|_T^2 \right| \geq \varepsilon \|x(t)\|_T^2 \right] \leq 2 \exp(-\frac{\varepsilon^2}{3} |S| \frac{\|x(t)\|_T^2}{M})$$

898 which is less than  $2 \exp(-\frac{\varepsilon^2}{3} |S|/R)$ , thus completes the proof.  $\square$

## 899 D Uniform Sketching Band-Limited Signals

900 In this section, we show an intermediate step in the reduction from Frequency estimation to Signal  
901 estimation: constructing a small sketching subset  $S$  of the time domain *obliviously* (without making  
902 any query to the signal), so that the signal discretized by  $S$  has norm close to the original continuous  
903 signal. More formally, we define the *uniform sketching Fourier signal problem* as follows:

904 **Problem D.1** (Uniform sketching band-limited signal problem). *Suppose  $f_1, f_2, \dots, f_k \in \mathbb{R}^d$ , and*  
905  *$v_1, \dots, v_k \in \mathbb{C}$ . Define the continuous signal  $x(t) = \sum_{j=1}^k v_j e^{2\pi i \langle f_j, t \rangle}$ . Let  $\eta = \min_{i \neq j} \|f_j - f_i\|_\infty$ .*

906 *Let  $\varepsilon \in (0, 0.1)$  denote the accuracy parameter. Find a set  $S = \{t_1, \dots, t_s\} \subseteq [0, T]^d$  of size  $s$  such*  
907 *that*

$$(1 - \varepsilon) \|x\|_T \leq \|x\|_S \leq (1 + \varepsilon) \|x\|_T,$$

908 where

$$\|x\|_T^2 := \frac{1}{T^d} \int_{[0,T]^d} |x(t)|^2 dt, \text{ and } \|x\|_S^2 := \frac{1}{|S|} \sum_{i \in [s]} |x(t_i)|^2.$$

909 In Section D.1, we show how to sketch one-dimensional signals with nearly-optimal weighted  
910 sketching.

### 911 D.1 Weighted uniform sketching one-dimensional signals

912 For one-dimensional signals, the most natural approach to uniform sketching is to uniformly sample  
913 some points in the time domain. However, by a standard concentration argument, we know that the  
914 sample complexity is  $\text{poly}(k)$ , which is not time-efficient for our task. In this section, we show a  
915 more efficient sketching method for one-dimensional band-limited signals by assigning different  
916 weights to each sample point. More precisely, let  $S = \{t_1, \dots, t_s\} \subseteq [0, T]$  be a discrete sketching  
917 set and let  $w \in \mathbb{R}_{\geq 0}^s$  be the weight vector. We define the weighted sketching norm of the signal as  
918 follows:

$$\|x\|_{S,w} := \sum_{i \in [s]} w_i \cdot |x(t_i)|^2.$$

919 And the goal of weighted uniform sketching is to find a small set  $S$  and a weight vector  $w$  such that  
 920  $\|x\|_{S,w} \approx \|x\|_T$ .

921 In the following lemma, we give a sketch for any one-dimensional band-limited signal with nearly-  
 922 optimal size:

923 **Lemma D.2** (Nearly-optimal weighted sketch for one-dimensional signals). *For  $k \in \mathbb{N}_+$ , define a  
 924 probability distribution  $D(t)$  as follows:*

$$D(t) := \begin{cases} c/(1 - |t/T|), & \text{for } |t| \leq T(1 - 1/k) \\ c \cdot k, & \text{for } |t| \in [T(1 - 1/k), T] \end{cases} \quad (6)$$

925 where  $c = \Theta(T^{-1} \log^{-1}(k))$  is a normalization factor such that  $\int_{-T}^T D(t) dt = 1$ .

926 For any  $f_1, \dots, f_k \in [-F, F]$  and  $v_1, \dots, v_k \in \mathbb{C}$ , let the continuous signal  $x(t) =$   
 927  $\sum_{j=1}^k v_j \exp(2\pi i f_j t)$ . For any  $\varepsilon, \rho \in (0, 1)$ , let  $S_D = \{t_1, \dots, t_s\}$  be a set of i.i.d. samples  
 928 from  $D(t)$  of size  $s \geq O(\varepsilon^{-2} k \log(k) \log(1/\rho))$ . Let the weight vector  $w \in \mathbb{R}^s$  be defined by  
 929  $w_i := 2/(TsD(t_i))$  for  $i \in [s]$ . Then with probability at least  $1 - \rho$ , we have

$$(1 - \varepsilon)\|x\|_T \leq \|x\|_{S_D, w} \leq (1 + \varepsilon)\|x\|_T,$$

930 where  $\|x\|_T^2 := \frac{1}{2T} \int_{-T}^T |x(t)|^2 dt$ .

931 *Proof.* For the convenient, in the proof, we use time duration  $[-T, T]$ . Let  $\mathcal{F}$  be defined as:

$$\mathcal{F} := \left\{ x(t) = \sum_{j=1}^k v_j \cdot e^{2\pi i f_j t} \mid f_j \in \mathbb{R} \cap [-F, F], v_j \in \mathbb{C} \right\}$$

932 Let  $\{v_1(t), v_2(t), \dots, v_k(t)\}$  be an orthonormal basis for  $\mathcal{F}$  with respect to the distribution  $D$ , i.e.,

$$\int_0^T D(t) \cdot v_i(t) \overline{v_j(t)} dt = \mathbf{1}_{i=j}, \quad \forall i, j \in [k].$$

933 We first prove that the distribution  $D$  is well-defined. By the condition that  $\int_{-T}^T D(t) dt = 1$ , we have

$$2 \int_0^{T(1-1/(k))} \frac{c}{(1 - |t/T|)} dt + 2 \int_{T(1-1/(k))}^T c \cdot k^2 dt = 1,$$

934 which implies that

$$\begin{aligned} c^{-1} &= 2 \int_0^{T(1-1/k)} \frac{1}{(1 - |t/T|)} dt + 2 \int_{T(1-1/k)}^T k^2 dt \\ &= 2T \log k + 2T \\ &= \Theta(T \log(k)). \end{aligned}$$

935 Thus, we get that  $c = \Theta(T^{-1} \log^{-1}(k))$ .

936 To show that sampling from distribution  $D$  give a good weighted sketch, we will use some technical  
 937 tools in Section B.3. Applying Lemma B.12 with  $D' = D$ ,  $D = \text{Uniform}([-T, T])$ ,  $d = k$ ,  $\delta = \rho$ ,  
 938 we have that, with probability at least  $1 - \rho$ , the matrix  $A \in \mathbb{C}^{s \times k}$  defined by  $A_{i,j} := \sqrt{w_i} \cdot v_j(x_i)$   
 939 satisfying

$$\|A^* A - I\|_2 \leq \varepsilon,$$

940 as long as  $s \geq \frac{C}{\varepsilon^2} \cdot K_{\text{IS}, D'} \log \frac{k}{\rho}$ . Then, by Lemma B.11, it implies that for every  $x \in \mathcal{F}$ ,

$$(1 - \varepsilon)\|x\|_T^2 \leq \|x\|_{S_D, w}^2 \leq (1 + \varepsilon)\|x\|_T^2.$$

941 It remains to bound the size of  $S_D$ ; or equivalently, we need to upper-bound the condition number of  
 942 the importance sampling of  $D'$  (see Definition B.10):

$$K_{\text{IS}, D'} := \sup_t \left\{ \frac{D(t)}{D'(t)} \cdot \sup_{f \in \mathcal{F}} \left\{ \frac{|f(t)|^2}{\|f\|_D^2} \right\} \right\}$$

$$\begin{aligned}
&= \sup_t \left\{ \frac{1}{2TD(t)} \cdot \sup_{f \in \mathcal{F}} \left\{ \frac{|f(x)|^2}{\|f\|_D^2} \right\} \right\} \\
&\leq \sup_t \left\{ \frac{1}{2TD(t)} \cdot \min \left\{ \frac{k}{1 - |t/T|}, k^2 \right\} \right\} \\
&\leq \max \left\{ \frac{(1 - |t/T|)}{2cT} \frac{k}{1 - |t/T|}, \frac{1}{2cTk} k^2 \right\} \\
&= \frac{k}{2cT} \\
&= O(k \log k),
\end{aligned}$$

where the first step follows from the definition, the second step follows from  $D(t) = \text{Uniform}([-T, T])(t) = \frac{1}{2T}$ , the third step follows from Theorem C.1 and Theorem C.2, and the remaining steps follow from direct calculations. Thus, we get that

$$|S_D| \geq \Omega(\varepsilon^{-2} k \log(k) \log(1/\rho)).$$

The lemma is then proved.  $\square$

## D.2 $\varepsilon$ -net for sparse band-limited signals

In this section, we construct  $\varepsilon$ -nets for high-dimensional sparse Fourier continuous and discrete signals.

**Lemma D.3** ( $\varepsilon$ -net construction for continuous signals). *Given  $k \in \mathbb{Z}_+$  unknown frequencies  $f_1, f_2, \dots, f_k \in [-F, F]^d$ . Let  $V := \{e^{2\pi i \langle f_i, t \rangle} \mid i \in [k]\}$  be a family of Fourier basis. Let  $\mathcal{Q} := \{u \in \text{span}\{V\} \mid \|u\|_T^2 = 1\}$  be the set of all signals in  $[0, T]^d$  with frequency  $f_1, \dots, f_k$ , where  $\|x\|_T^2 = \frac{1}{T^d} \int_{[0, T]^d} |x(t)|^2 dt$ .*

Then, there exists an  $\varepsilon$ -net  $\mathcal{P}_d \subset \mathcal{Q}$  such that

1.  $\forall u \in \mathcal{Q}, \exists w \in \mathcal{P}_d, \|u - w\|_T \leq \varepsilon$ .
2.  $|\mathcal{P}_d| \leq \left(5 \frac{k}{\varepsilon}\right)^{2k}$ .

*Proof.* We first construct an  $\frac{\varepsilon}{k}$ -net for the unit disk in  $\mathbb{C}$ , i.e.,  $\{z \in \mathbb{C} \mid |z| \leq 1\}$ . Let  $\mathcal{P}'$  denote

$$\mathcal{P}' := \left\{ \frac{\varepsilon}{2k} j_1 + \mathbf{i} \frac{\varepsilon}{2k} j_2 \mid j_1, j_2 \in \mathbb{Z}, |j_1| \leq \frac{2k}{\varepsilon}, |j_2| \leq \frac{2k}{\varepsilon} \right\}.$$

Notice that  $|\varepsilon/(2k)j_1| \leq \varepsilon/(2k) \cdot 2k/\varepsilon = 1$ ; and similarly,  $|\varepsilon/(2k)j_2| \leq 1$ . Thus, for any  $a \in \mathbb{C}$ ,  $|a| \leq 1$ , there is a  $b \in \mathcal{P}'$  such that

$$|a - b| \leq \varepsilon/(2k) + \varepsilon/(2k) \leq \varepsilon/k.$$

Moreover,

$$|\mathcal{P}'| \leq (2 \cdot 2k/\varepsilon + 1) \cdot (2 \cdot 2k/\varepsilon + 1) = \left(4 \frac{k}{\varepsilon} + 1\right)^2.$$

Hence, we conclude that,

- $\mathcal{P}'$  is an  $\frac{\varepsilon}{k}$ -net in the unit circle of  $\mathbb{C}$ .
- $\mathcal{P}'$  has size at most  $\left(4 \frac{k}{\varepsilon} + 1\right)^2$ .

Then, we use  $\mathcal{P}'$  to construct an  $\varepsilon$ -net for  $\mathcal{Q}$ . Since the dimension of  $\mathcal{Q}$  is at most  $k$ , we take an orthonormal basis  $w_1, \dots, w_k \in \mathcal{Q}$  such that,

$$\int_{[0, T]^d} w_i(t) \overline{w_j(t)} dt = \mathbf{1}_{i=j}.$$



963 And we define

$$\mathcal{P}'' := \left\{ \sum_{i=1}^k \alpha_i w_i \mid \forall i \in [k], \alpha_i \in \mathcal{P}' \right\}.$$

964 First, for any  $u \in \mathcal{Q}$ , we have

$$u = \sum_{i=1}^k v_i \exp(2\pi i \langle f_i, t \rangle) = \sum_{i=1}^k \alpha'_i w_i,$$

965 which implies that  $|\alpha'_i| \leq 1$  for all  $i \in [k]$ . So, for any  $a \in \mathcal{Q}$ , there is a  $b \in \mathcal{P}''$  such that  
 966  $\|a - b\|_T \leq k \cdot \varepsilon/k = \varepsilon$ . Moreover,  $|\mathcal{P}''| \leq ((4\frac{k}{\varepsilon} + 1)^2)^k \leq (5\frac{k}{\varepsilon})^{2k}$ . Therefore, we conclude that  
 967  $\mathcal{P}''$  is an  $\varepsilon$ -net for  $\mathcal{Q}$  and  $|\mathcal{P}''| \leq (5\frac{k}{\varepsilon})^{2k}$ .

968 Then we define

$$\mathcal{P}_d := \{v \in \mathcal{Q} \mid \forall u \in \mathcal{P}'', v = \operatorname{argmin}_{v \in \mathcal{Q}} \{\|v - u\|_T\}\}.$$

969 therefore we have that, for any  $a \in \mathcal{Q}$ , there is a  $b \in \mathcal{P}''$  such that  $\|a - b\|_T \leq \varepsilon$ , because there  
 970 is a  $c \in \mathcal{P}_d$ , such that  $\|c - b\|_T = \min_{d \in \mathcal{Q}} \|d - b\|_T \leq \|a - b\|_T \leq \varepsilon$ . Then,  $\|c - a\|_T \leq$   
 971  $\|c - b\|_T + \|b - a\|_T \leq 2\varepsilon$ .  $\square$

## 972 E Fast Implementation of Well-Balanced Sampling Procedure

973 Well-balanced sampling procedure was first defined in [Chen and Price \(2019a\)](#) to study the active  
 974 linear regression problem. Our signal estimation algorithm will call it as a sub-procedure. In this  
 975 section, we give a fast implementation of well-balanced sampling procedure based on the Randomized  
 976 BSS algorithm [Batson et al. \(2012\)](#); [Lee and Sun \(2015\)](#).

977 First, we restate the definition of well-balanced sampling procedure in [Chen and Price \(2019a\)](#).

978 **Definition E.1** (Well-balanced sampling procedure (WBSP), [Chen and Price \(2019a\)](#)). *Given a linear*  
 979 *family  $\mathcal{F}$  and underlying distribution  $D$ , let  $P$  be a random sampling procedure that terminates in  $m$*   
 980 *iterations ( $m$  is not necessarily fixed) and provides a coefficient  $\alpha_i$  and a distribution  $D_i$  to sample*  
 981  *$x_i \sim D_i$  in every iteration  $i \in [m]$ .*

982 We say  $P$  is an  $\varepsilon$ -WBSP if it satisfies the following two properties:

1. With probability 0.9, for weight  $w_i = \alpha_i \cdot \frac{D(x_i)}{D_i(x_i)}$  of each  $i \in [m]$ ,

$$\sum_{i=1}^m w_i \cdot |h(x_i)|^2 \in [1 - 10\sqrt{\varepsilon}, 1 + 10\sqrt{\varepsilon}] \cdot \|h\|_D^2 \quad \forall h \in \mathcal{F}.$$

2. The coefficients always have  $\sum_{i=1}^m \alpha_i \leq \frac{5}{4}$  and  $\alpha_i \cdot K_{\mathcal{S}, D_i} \leq \frac{\varepsilon}{2}$  for all  $i \in [m]$ .

984 This definition describes a general sampling procedure that uses a few samples to represent the whole  
 985 continuous signal, and the sampling procedure should satisfy two properties: one guarantees that the  
 986 norm of any function in a function family is preserved, and another guarantees that the norm of noise  
 987 is also preserved.

988 In Section [E.1](#), we review some results in [Chen and Price \(2019a\)](#) and show that WBSP can be  
 989 implemented via randomized spectral sparsification. In Section [E.2](#), we design a data structure  
 990 and improve the time efficiency of the WBSP. In Section [E.3](#), we discover a tradeoff between the  
 991 preprocessing cost and the query cost, which can improve the space complexity.

### 992 E.1 Randomized BSS implies a WBSP

993 In this section, we review the result of [Chen and Price \(2019a\)](#), which shows that the Randomized  
 994 BSS algorithm [Batson et al. \(2012\)](#); [Lee and Sun \(2015\)](#) implies a well-balanced sampling procedure.

995 **Lemma E.2** (Lemma 5.1 in [Chen and Price \(2019a\)](#)). *Let  $G$  be any domain. Given any dimension  $d$*   
 996 *linear function family  $\mathcal{F}$  of function  $f : G \rightarrow \mathbb{C}$ ,*

$$\mathcal{F} = \{f(t) = \sum_{j=1}^d v_j u_j(t) \mid v_j \in \mathbb{C}\},$$

997 where  $u_j : G \rightarrow \mathbb{C}$ . Given any distribution  $D$  over  $G$ , and any  $\varepsilon > 0$ , there exists an efficient  
 998 procedure (Algorithm 2) that runs in  $O(\varepsilon^{-1}d^3|G| + \varepsilon^{-1}d^{\omega+1})$  time and outputs a set  $S \subseteq G$  and  
 999 weight  $w$  such that

- 1000 •  $|S| = O(d/\varepsilon)$ ,  $w \in \mathbb{R}^{|S|}$ ,
- 1001 • the procedure is an  $\varepsilon$ -WBSP,

1002 holds with probability  $1 - \frac{1}{200}$ .

---

**Algorithm 2** A well-balanced sampling procedure based on Randomized BSS (see [Chen and Price \(2019a\)](#))

---

```

1: procedure RANDBSS( $d, \mathcal{F}, D, \varepsilon$ )
2:   Find an orthonormal basis  $v_1, \dots, v_d$  of  $\mathcal{F}$  under  $D$ 
3:   Set  $\gamma \leftarrow \sqrt{\varepsilon}/3$  and  $\text{mid} \leftarrow \frac{4d/\gamma}{1/(1-\gamma)-1/(1+\gamma)}$ 
4:    $j \leftarrow 0, B_0 \leftarrow 0$ 
5:    $l_0 \leftarrow -2d/\gamma, u_0 \leftarrow 2d/\gamma$ 
6:   while  $u_{j+1} - l_{j+1} < 8d/\gamma$  do
7:      $\Phi_j \leftarrow \text{tr}[(u_j I - B_j)^{-1}] + \text{tr}[(B_j - l_j I)^{-1}]$  ▷ The potential function at iteration  $j$ .
8:     Set the coefficient  $\alpha_j \leftarrow \frac{\gamma}{\Phi_j} \cdot \frac{1}{\text{mid}}$ 
9:     Set  $v(x) \leftarrow (v_1(x), \dots, v_d(x))$ 
10:    for  $x \in \text{supp}(D)$  do
11:      Set the distribution
      
$$D_j(x) \leftarrow D(x) \cdot \left( v(x)^\top (u_j I - B_j)^{-1} v(x) + v(x)^\top (B_j - l_j I)^{-1} v(x) \right) / \Phi_j$$

12:    end for
13:    Sample  $x_j \sim D_j$  and set a scale  $s_j \leftarrow \frac{\gamma}{\Phi_j} \cdot \frac{D(x_j)}{D_j(x_j)}$ 
14:     $B_{j+1} \leftarrow B_j + s_j \cdot v(x_j)v(x_j)^\top$ 
15:     $u_{j+1} \leftarrow u_j + \frac{\gamma}{\Phi_j(1-\gamma)}, \quad l_{j+1} \leftarrow l_j + \frac{\gamma}{\Phi_j(1+\gamma)}$ 
16:     $j \leftarrow j + 1$ 
17:  end while
18:   $m \leftarrow j$ 
19:  Assign the weight  $w_j \leftarrow s_j/\text{mid}$  for each  $x_j$ 
20:  return  $\{x_1, x_2, \dots, x_m\}, w$ 
21: end procedure

```

---

## 1003 E.2 Fast implementation of WBSP

1004 In this section, we give a fast implementation of Algorithm 2:

1005 **Theorem E.3** (Fast implementation of WBSP). *Let  $G$  be any domain. Given any dimension  $d$  linear*  
 1006 *function family  $\mathcal{F}$  of function  $f : G \rightarrow \mathbb{C}$ ,*

$$\mathcal{F} = \{f(t) = \sum_{j=1}^d v_j u_j(t) | v_j \in \mathbb{C}\},$$

1007 where  $u_j : G \rightarrow \mathbb{C}$ . Given any distribution  $D$  over  $G$ , and any  $\varepsilon > 0$ , there exists an efficient  
 1008 procedure (Algorithm 3) that runs in  $O(d^2|G| + \varepsilon^{-1}d^3 \log |G| + \varepsilon^{-1}d^{\omega+1})$  time and outputs a set  
 1009  $S \subseteq G$  and weight  $w \in \mathbb{R}^{|S|}$  such that the following properties hold with probability at least 0.995:

- 1010 •  $|S| = O(d/\varepsilon)$ ,
- 1011 • the procedure is an  $\varepsilon$ -WBSP.

1012 Our algorithm is based on a data structure for solving the *online quadratic-form sampling problem*  
 1013 defined as follows:

---

**Algorithm 3** Our fast implementation of well-balanced sampling procedure
 

---

```

1: procedure RANDBSS+( $d, \mathcal{F}, D, \varepsilon$ ) ▷ Theorem E.3
2:   /*Preprocessing*/
3:   Find an orthonormal basis  $v_1, \dots, v_d$  of  $\mathcal{F}$  under  $D$ 
4:    $\gamma \leftarrow \sqrt{\varepsilon}/3$  and  $\text{mid} \leftarrow \frac{4d/\gamma}{1/(1-\gamma)-1/(1+\gamma)}$ 
5:    $j \leftarrow 0, B_0 \leftarrow 0$ 
6:    $l_0 \leftarrow -2d/\gamma, u_0 \leftarrow 2d/\gamma$ 
7:    $\delta \leftarrow 1/\text{poly}(d)$ 
8:   ▷ Let  $v(x) = (v_1(x), \dots, v_d(x)) \in \mathbb{R}^d$ 
9:   DS.INIT( $|D|, d, \{v(x_1), \dots, v(x_{|D|})\} \subset \mathbb{R}^d, \{D(x_1), \dots, D(x_{|D|})\} \subset \mathbb{R}$ ) ▷ Algorithm 4
10:  /*Iterative step*/
11:  while  $u_{j+1} - l_{j+1} < 8d/\gamma$  do
12:     $\Phi_j \leftarrow \text{tr}[(u_j I - B_j)^{-1}] + \text{tr}[(B_j - l_j I)^{-1}]$  ▷ The potential function at iteration  $j$ .
13:     $\alpha_j \leftarrow \frac{\gamma}{\Phi_j} \cdot \frac{1}{\text{mid}}$ 
14:     $E_j \leftarrow (u_j I - B_j)^{-1} + (B_j - l_j I)^{-1}$ 
15:     $q \leftarrow \text{DS.QUERY}(E_j/\Phi_j)$  ▷  $q \in [|D|]$ , Algorithm 4
16:     $x_j \leftarrow x_q$  and set a scale  $s_j \leftarrow \frac{\gamma}{v(x_j)^\top E_j v(x_j)}$ 
17:     $B_{j+1} \leftarrow B_j + s_j \cdot v(x_j) v(x_j)^\top$ 
18:     $u_{j+1} \leftarrow u_j + \frac{\gamma}{\Phi_j(1-\gamma)}, \quad l_{j+1} \leftarrow l_j + \frac{\gamma}{\Phi_j(1+\gamma)}$ 
19:     $j \leftarrow j + 1$ 
20:  end while
21:   $m \leftarrow j$ 
22:  Assign the weight  $w_j \leftarrow s_j/\text{mid}$  for each  $x_j$ 
23:  return  $\{x_1, x_2, \dots, x_m\}, w$ 
24: end procedure

```

---

1014 **Problem E.4** (Online Quadratic-Form Sampling Problem). *Given  $n$  vectors  $v_1, \dots, v_n \in \mathbb{R}^d$  and  $n$*   
 1015 *coefficients  $\alpha_1, \dots, \alpha_n$ , for any PSD matrix  $A \in \mathbb{R}^{d \times d}$ , output a sample  $i \in [n]$  from the following*  
 1016 *distribution  $\mathcal{D}_A$ :*

$$\Pr_{\mathcal{D}_A}[i] := \frac{\alpha_i \cdot v_i^\top A v_i}{\sum_{j=1}^n \alpha_j \cdot v_j^\top A v_j} \quad \forall i \in [n]. \quad (7)$$

1017 **Theorem E.5.** *There is a data structure (Algorithm 4) that uses  $O(nd^2)$  spaces for the Online*  
 1018 *Quadratic-Form Sampling Problem with the following procedures:*

- 1019 • INIT( $n, d, \{v_1, \dots, v_n\} \subset \mathbb{R}^d, \{\alpha_1, \dots, \alpha_n\} \subset \mathbb{R}$ ): *the data structure preprocesses in time*  
 1020  *$O(nd^2)$ .*
- 1021 • QUERY( $A \in \mathbb{R}^{d \times d}$ ): *Given a PSD matrix  $A$ , the QUERY operation samples  $i \in [n]$  exactly*  
 1022 *from the probability distribution  $\mathcal{D}_A$  defined in Problem E.4 in  $O(d^2 \log n)$ -time.*

1023 *Proof.* The pseudo-code of the algorithm is given as Algorithm 4. The idea is to build a binary tree  
 1024 such that each node has an interval in  $[l, \dots, r] \subset [1, \dots, n]$  and stores a matrix  $\sum_{i=l}^r \alpha_i \cdot v_i v_i^\top$ . For  
 1025 each internal node with interval  $[l, \dots, r]$ , its left child node has interval  $[l, \dots, \lfloor (l+r)/2 \rfloor]$ , and its  
 1026 right child node has interval  $[\lfloor (l+r)/2 \rfloor + 1, \dots, r]$ .

1027 We first prove the correctness. Suppose the output of QUERY is  $i \in [n]$ . We compute its probability.  
 1028 Let  $u_0 = \text{root}, u_1, \dots, u_t$  be the path from the root of the tree to the leaf with  $\text{id} = i$ . Then, we have

$$\Pr[u_t] = \prod_{j=1}^t \Pr[u_j | u_{j-1}] = \prod_{j=1}^t \frac{\sum_{k=l_j}^{r_j} \alpha_k \cdot v_k^\top A v_k}{\sum_{k=l_{j-1}}^{r_{j-1}} \alpha_k \cdot v_k^\top A v_k} = \frac{\alpha_i \cdot v_i^\top A v_i}{\sum_{k=1}^n \alpha_k \cdot v_k^\top A v_k},$$

1029 where  $[l_j, \dots, r_j]$  is the range of the node  $u_j$ , the first step follows from the conditional probability,  
 1030 the second step follows from Line 34 in Algorithm 4, and the last step follows from the telescoping  
 1031 products. Hence, we get that

$$\Pr[\text{QUERY}(A) = i] = \Pr_{\mathcal{D}_A}[i] \quad \forall i \in [n].$$

1032 Hence, the sampling distribution is the same as the Online Quadratic-Form Sampling Problem's  
1033 distribution.

1034 For the running time, in the preprocessing stage, we build the binary tree recursively. It is easy to  
1035 see that the number of nodes in the tree is  $O(n)$  and the depth is  $O(\log n)$ . For a leaf node, we take  
1036  $O(d^2)$ -time to compute the matrix  $\alpha_i \cdot v_i v_i^\top \in \mathbb{R}^{d \times d}$ . For an internal node, we take  $O(d^2)$ -time to  
1037 add up the matrices of its left and right children. Thus, the total preprocessing time is  $O(nd^2)$ .

1038 In the query stage, we walk along a path from the root to a leaf, which has  $O(\log n)$  steps. In each  
1039 step, we compute the inner product between  $A$  and the current node's matrix, which takes  $O(d^2)$ -time.  
1040 And we compute the inner product between  $A$  and its left child node's matrix, which also takes  
1041  $O(d^2)$ -time. Then, we toss a coin and decide which subtree to move. Hence, each query takes  
1042  $O(d^2 \log n)$ -time.

1043 The theorem is then proved.  $\square$

1044 **Lemma E.6** (Running time of Procedure RANDBSS+ in Algorithm 3). *Algorithm 3 runs in*

- 1045 •  $O(|D|d^2)$ -time for preprocessing,
- 1046 •  $O(d^2 \log(|D|) + d^\omega)$ -time per iteration, and
- 1047 •  $O(\varepsilon^{-1}d)$  iterations.

1048 Thus, the total running time is,

$$O(|D|d^2 + \varepsilon^{-1}d \cdot (d^2 \log |D| + d^\omega)).$$

1049 *Proof.* In each call of the Procedure RANDBSS+ in Algorithm 3,

- 1050 • Finding orthonormal basis takes  $O(|D|d^2)$ .
- 1051 • In the line 9, it runs  $O(|D|d^2)$  times.
- 1052 • The while loop repeat  $O(\varepsilon^{-1}d)$  times.
  - 1053 – Line 14 is computing  $(u_j I - B_j) \in \mathbb{C}^{d \times d}$ ,  $(u_j I - B_j)^{-1}$ . This part takes  $O(d^\omega)$  time<sup>6</sup>.
  - 1054 – Note that line 15 of Procedure RANDBSS+ in Algorithm 3 runs  $O(d^2 \log |D|)$  times.

1055 So, the time complexity of Procedure RANDBSS+ in Algorithm 3 is

$$O(|D|d^2 + \varepsilon^{-1}d \cdot (d^2 \log |D| + d^\omega)).$$

1056  $\square$

1057 **Lemma E.7** (Correctness of Procedure RANDBSS+ in Algorithm 3). *Given any dimension  $d$  linear*  
1058 *space  $\mathcal{F}$ , any distribution  $D$  over the domain of  $\mathcal{F}$ , and any  $\varepsilon > 0$ , RANDBSS+( $d, \mathcal{F}, D, \varepsilon$ ) is an*  
1059  *$\varepsilon$ -WBSP that terminates in  $O(d/\varepsilon)$  rounds with probability  $1 - 1/200$ .*

1060 *Proof.* We first claim that, for each  $j \in [m]$ ,  $x_j$  has the same distribution as  $D_j$ , where

$$D_j(x) = D(x) \cdot (v(x)^\top E_j v(x)) / \Phi_j \quad \forall x \in D$$

1061 Notice that sampling from distribution  $D_j$  can be reformulated as an Online Quadratic-Form Sampling  
1062 Problem: the vectors are  $\{v(x)\}_{x \in D}$ , the coefficients are  $\{D(x)\}_{x \in D}$ , and the query matrix is  
1063  $E'_j := E_j / \Phi_j$ . Then, we have  $D_j = \mathcal{D}_{E'_j}$  defined in Problem E.4. Hence, by Theorem E.5, we can  
1064 use the data structure (Algorithm 4) to efficiently sample from  $D_j$ .

1065 Therefore, the sample  $x_j$  in each iteration is generated from the same distribution as the original  
1066 randomized BSS algorithm (Algorithm 2). Then, the WBSP guarantee and the number of iterations  
1067 immediately follow from the proof of (Chen and Price, 2019a, Lemma 5.1).

1068 The proof of the lemma is then completed.  $\square$

<sup>6</sup>Note that this step seems to be very difficult to speed up via the Sherman-Morrison formula since  $u_j$  changes in each iteration and the update is of high rank.

---

**Algorithm 4** Quadratic-form sampling data structure

---

```

1: structure Node
2:    $V \in \mathbb{R}^{d \times d}$ 
3:   left, right ▷ Point to the left/right child in the tree
4: end structure
5: data structure DS
6: members
7:    $n \in \mathbb{N}$  ▷ The number of vectors
8:    $v_1, \dots, v_n \in \mathbb{R}^d$  ▷  $d$ -dimensional vectors
9:    $\alpha_1, \dots, \alpha_n \in \mathbb{R}$  ▷ Coefficients
10:  root: Node ▷ The root of the tree
11: end members
12: procedure BUILDTREE( $l, r$ ) ▷  $[l, \dots, r]$  is the range of the current node
13:    $p \leftarrow \text{new Node}$ 
14:   if  $l = r$  then ▷ Leaf node
15:      $p.V \leftarrow \alpha_l \cdot v_l v_l^\top$  ▷ It takes  $O(d^2)$ -time
16:   else ▷ Internal node
17:      $mid \leftarrow \lfloor (l + r)/2 \rfloor$ 
18:      $p.\text{left} \leftarrow \text{BUILDTREE}(l, mid)$ 
19:      $p.\text{right} \leftarrow \text{BUILDTREE}(mid + 1, r)$ 
20:      $p.V \leftarrow (p.\text{left}).V + (p.\text{right}).V$  ▷ It takes  $O(d^2)$ -time
21:   end if
22:   return  $p$ 
23: end procedure
24: procedure INIT( $n, d, \{v_i\}_{i \in [n]} \subseteq \mathbb{R}^d, \{\alpha_i\}_{i \in [n]} \subseteq \mathbb{R}$ )
25:    $v_i \leftarrow v_i, \alpha_i \leftarrow \alpha_i$  for  $i \in [n]$ 
26:   root  $\leftarrow \text{BUILDTREE}(1, n)$ 
27: end procedure
28: procedure QUERY( $A \in \mathbb{R}^{d \times d}$ )
29:    $p \leftarrow \text{root}, l \leftarrow 1, r \leftarrow n$ 
30:    $s \leftarrow 0$ 
31:   while  $l \neq r$  do ▷ There are  $O(\log n)$  iterations
32:      $w \leftarrow \langle p.V, A \rangle$  ▷ It takes  $O(d^2)$ -time
33:      $w_\ell \leftarrow \langle (p.\text{left}).V, A \rangle$ 
34:     Sample  $c$  from Bernoulli( $w_\ell/w$ )
35:     if  $c = 0$  then
36:        $p \leftarrow p.\text{left}, r \leftarrow \lfloor (l + r)/2 \rfloor$ 
37:     else
38:        $p \leftarrow p.\text{right}, l \leftarrow \lfloor (l + r)/2 \rfloor + 1$ 
39:     end if
40:   end while
41:   return  $l$ 
42: end procedure
43: end data structure

```

---

1069 *Proof of Theorem E.3.* The running time of the algorithm follows from Lemma E.6, and the correct-  
1070 ness follows from Lemma E.7. □

### 1071 E.3 Trade-off between preprocessing and query

1072 In this section, we consider the preprocessing and query trade-off in the data structure for quadratic  
1073 form sampling problem. In the following theorem, we give a new data structure that takes less time  
1074 in preprocessing and more time for each query than Theorem E.5, and the space complexity is also  
1075 reduced from  $O(nd^2)$  to  $O(nd)$ .

1076 **Theorem E.8.** *There is a data structure (Algorithms 5 and 6) that uses  $O(nd)$  spaces for the Online*  
1077 *Quadratic-Form Sampling Problem with the following procedures:*

- 1078 •  $\text{INIT}(n, d, \{v_1, \dots, v_n\} \subset \mathbb{R}^d, \{\alpha_1, \dots, \alpha_n\} \subset \mathbb{R})$ : the data structure preprocesses in time  
1079  $O(nd^{\omega-1})$ .
- 1080 •  $\text{QUERY}(A \in \mathbb{R}^{d \times d})$ : Given a PSD matrix  $A$ , the QUERY operation samples  $i \in [n]$  exactly  
1081 from the probability distribution  $\mathcal{D}_A$  defined in Problem E.4 in  $O(d^2 \log(n/d) + d^\omega)$ -time.

1082 *Proof.* The time and space complexities follow from Lemma E.9. And the correctness follows from  
1083 Lemma E.10.  $\square$

---

**Algorithm 5** Quadratic-form sampling with preprocessing-query trade-off: Preprocessing

---

```

1: structure Node
2:    $V_1, V_2 \in \mathbb{R}^{d \times d}$ 
3:   left, right ▷ Point to the left/right child in the tree
4: end structure
5: data structure DS+ ▷ Theorem E.8
6: members
7:    $n \in \mathbb{N}$  ▷ The number of vectors
8:    $m \in \mathbb{N}$  ▷ The number of blocks
9:    $v_1, \dots, v_n \in \mathbb{R}^d$  ▷  $d$ -dimensional vectors
10:  root: Node ▷ The root of the tree
11: end members
12: procedure BUILDTREE( $l, r$ ) ▷  $[l, \dots, r]$  is the range of the current node
13:    $p \leftarrow \text{new Node}$ 
14:   if  $l = r$  then ▷ Leaf node
15:      $p.V_2 \leftarrow [v_{(l-1)d+1} \ \dots \ v_{ld}]$ 
16:      $p.V_1 \leftarrow (p.V_2) \cdot (p.V_2)^\top$  ▷ It takes  $O(d^\omega)$ -time
17:   ▷  $p.\text{mat1} = \sum_{i=(l-1)d+1}^{ld} v_i v_i^\top$ 
18:   else ▷ Internal node
19:      $mid \leftarrow \lfloor (l+r)/2 \rfloor$ 
20:      $p.\text{left} \leftarrow \text{BUILDTREE}(l, mid)$ 
21:      $p.\text{right} \leftarrow \text{BUILDTREE}(mid+1, r)$ 
22:      $p.V_1 \leftarrow (p.\text{left}).V_1 + (p.\text{right}).V_1$  ▷ It takes  $O(d^2)$ -time
23:   end if
24:   return  $p$ 
25: end procedure
26: procedure INIT( $n, d, \{v_i\}_{i \in [n]} \subseteq \mathbb{R}^d, \{\alpha_i\}_{i \in [n]} \subseteq \mathbb{R}$ )
27:    $v_i \leftarrow v_i \cdot \sqrt{\alpha_i}$  for  $i \in [n]$ 
28:    $m \leftarrow n/d$  ▷ We assume that  $n$  is divisible by  $d$ 
29:   Group  $\{v_i\}_{i \in [n]}$  into  $m$  blocks  $B_1, \dots, B_m$  ▷  $B_i = \{v_{(i-1)d+1}, \dots, v_{id}\}$  for  $i \in [m]$ 
30:   root  $\leftarrow \text{BUILDTREE}(1, m)$ 
31: end procedure
32: end data structure

```

---

1084 **Lemma E.9** (Time and space complexities of Algorithms 5 and 6). The INIT procedure takes  
1085  $O(nd^{\omega-1})$ -time. The QUERY procedure takes  $O(d^2 \log(n/d) + d^\omega)$ -time. The data structure uses  
1086  $O(nd)$ -space.

1087 *Proof.* We prove the space and time complexities of the data structure as follows:

1088 **Space complexity:** Let  $m = n/d$ . It is easy to see that there are  $O(m)$  nodes in the data structure.  
1089 And each node has two  $d$ -by- $d$  matrices. Hence, the total space used by the data structure is  
1090  $O(n/d) \cdot O(d^2) = O(nd)$ .

1091 **Time complexity:** In the preprocessing stage, the time-consuming step is the call of BUILDTREE.  
1092 There are  $O(m)$  internal nodes and  $O(m)$  leaf nodes. Each internal node takes  $O(d^2)$ -time to  
1093 construct the matrix  $V_1$  (Line 22). For each leaf node, it takes  $O(d^2)$ -time to form the matrix  $V_2$   
1094 (Line 15). And it takes  $O(d^\omega)$ -time to compute the matrix  $V_1$  (Line 16). Hence, the total running  
1095 time of BUILDTREE is  $O(md^\omega) = O(nd^{\omega-1})$ .

---

**Algorithm 6** Quadratic-form sampling with preprocessing-query trade-off: Query
 

---

```

1: data structure DS+ ▷ Theorem E.8
2: members
3:    $n \in \mathbb{N}$  ▷ The number of vectors
4:    $m \in \mathbb{N}$  ▷ The number of blocks
5:    $v_1, \dots, v_n \in \mathbb{R}^d$  ▷  $d$ -dimensional vectors
6:   root: Node ▷ The root of the tree
7: end members
8: procedure BLOCKSAMPLING( $p, l \in \mathbb{N}, A \in \mathbb{R}^{d \times d}$ ) ▷  $p$  is a leaf node with index  $l$ 
9:    $U \leftarrow (p.V_2)^\top \cdot A \cdot (p.V_2)$  ▷ It takes  $O(d^\omega)$ -time
10:  Define a distribution  $\mathcal{D}_l$  over  $[d]$  such that  $\mathcal{D}_l(i) \propto U_{i,i}$ 
11:  Sample  $i \in [d]$  from  $\mathcal{D}_l$  ▷ It takes  $O(d)$ -time
12:  return  $(l-1)d + i$ 
13: end procedure
14: procedure QUERY( $A \in \mathbb{R}^{d \times d}$ )
15:   $p \leftarrow \text{root}, l \leftarrow 1, r \leftarrow m$ 
16:   $s \leftarrow 0$ 
17:  while  $l \neq r$  do ▷ There are  $O(\log m)$  iterations
18:     $w \leftarrow \langle p.V_1, A \rangle$  ▷ It takes  $O(d^2)$ -time
19:     $w_\ell \leftarrow \langle (p.\text{left}).V_1, A \rangle$ 
20:    Sample  $c$  from Bernoulli( $w_\ell/w$ )
21:    if  $c = 0$  then
22:       $p \leftarrow p.\text{left}, r \leftarrow \lfloor (l+r)/2 \rfloor$ 
23:    else
24:       $p \leftarrow p.\text{right}, l \leftarrow \lfloor (l+r)/2 \rfloor + 1$ 
25:    end if
26:  end while
27:  return BLOCKSAMPLING( $p, l, A$ )
28: end procedure
29: end data structure

```

---

1096 In the query stage, the While loop in the QUERY procedure (Line 17) is the same as in Algorithm 4.  
 1097 Since there are  $O(m)$  nodes in the tree, it takes  $O(d^2 \log m)$ -time. Then, in the BLOCKSAMPLING  
 1098 procedure, it takes  $O(d^\omega)$ -time to compute the matrix  $U$  (Line 9), and it takes  $O(d)$ -time to sample  
 1099 an index from the distribution  $\mathcal{D}_l$  (Line 11). Hence, the total running time for each query is  
 1100  $O(d^2 \log m + d^\omega) = O(d^2 \log(n/d) + d^\omega)$ .

1101 The proof of the lemma is then completed. □

1102 **Lemma E.10** (Correctness of Algorithm 6). *The distribution of the output of the QUERY( $A$ ) is  $\mathcal{D}_A$*   
 1103 *defined by Eq. (7).*

1104 *Proof.* For simplicity, we assume that all the coefficients  $\alpha_i = 1$ .

1105 Let  $u_0 = \text{root}, u_1, \dots, u_t$  be the path in the While loop (Line 17) from the root of the tree to the leaf  
 1106 with index  $l \in [m]$ . By the construction of leaf node, we have

$$V_1 = V_2 V_2^\top = [v_{(l-1)d+1} \quad \dots \quad v_{ld}] \begin{bmatrix} v_{(l-1)d+1}^\top \\ \vdots \\ v_{ld}^\top \end{bmatrix} = \sum_{i=(l-1)d+1}^{ld} v_i v_i^\top,$$

1107 which is the same as the  $V$ -matrix in Algorithm 4. Hence, similar to the proof of Theorem E.5, we  
 1108 have

$$\Pr[u_t] = \prod_{j=1}^t \Pr[u_j | u_{j-1}] = \frac{\sum_{i=(l-1)d+1}^{ld} v_i^\top A v_i}{\sum_{i=1}^n v_i^\top A v_i}.$$

1109 where  $\{(l-1)d+1, \dots, ld\}$  is the range of the node  $u_t$  and  $\{1, \dots, n\}$  is the range of  $u_0$ .

1110 Then, consider the BLOCKSAMPLING procedure. Let  $\{v_1, \dots, v_d\}$  be the vectors in the input block.  
 1111 At Line 9, we have

$$U = V_2^\top A V_2 = \begin{bmatrix} v_1^\top \\ \vdots \\ v_d^\top \end{bmatrix} A [v_1 \quad \dots \quad v_d].$$

1112 For  $i \in [d]$ , the  $i$ -th element in the diagonal of  $U$  is

$$U_{i,i} = v_i^\top A v_i.$$

1113 Hence,

$$\Pr[\text{BLOCKSAMPLING} = i] = \frac{v_i^\top A v_i}{\sum_{j=1}^d v_j^\top A v_j}.$$

1114 Therefore, for any  $k \in [n]$ , if  $k = (l-1)d + r$  for some  $l, r \in \mathbb{N}$ , then the sample probability is

$$\begin{aligned} \Pr[\text{QUERY}(A) = k] &= \Pr[\text{BLOCKSAMPLING} = k \mid u_t = \text{Block } l] \cdot \Pr[u_t = \text{Block } l] \\ &= \frac{v_k^\top A v_k}{\sum_{i=(l-1)d+1}^{ld} v_i^\top A v_i} \cdot \frac{\sum_{i=(l-1)d+1}^{ld} v_i^\top A v_i}{\sum_{i=1}^n v_i^\top A v_i} \\ &= \frac{v_k^\top A v_k}{\sum_{i=1}^n v_i^\top A v_i} \\ &= \mathcal{D}_A(k). \end{aligned}$$

1115 The lemma is then proved. □

1116 As a corollary, we get a WBSP using less space:

1117 **Corollary E.11** (Space efficient implementation of WBSP). *By plugging-in the new data structure*  
 1118 *(Algorithms 5 and 6) to FASTERRANDSAMPLINGBSS (Algorithm 3), we get an algorithm taking*  
 1119  *$O(|D|d^2 + \gamma^{-2}d \cdot (d^2 \log |D| + d^\omega))$ -time and using  $O(|D|d)$ -space.*

1120 *Proof.* In the preprocessing stage of FASTERRANDSAMPLINGBSS, we take  $O(|D|d^2)$ -time for  
 1121 Gram-Schmidt process and  $O(|D|d^{\omega-1})$ -time for initializing the data structure (Algorithm 5).

1122 The number of iterations is  $\gamma^{-2}d$ . In each iteration, the matrix  $E_j$  can be computed in  $O(d^\omega)$ -time.  
 1123 And querying the data structure takes  $O(d^2 \log(|D|/d) + d^\omega)$ -time.

1124 Hence, the total running time is

$$O(|D|d^2 + |D|d^{\omega-1} + \gamma^{-2}d(d^2 \log(|D|/d) + d^\omega)) = O(|D|d^2 + \gamma^{-2}d^{\omega+1} + \gamma^{-2}d^2 \log |D|).$$

1125 For the space complexity, the data structure uses  $O(|D|d)$ -space. The algorithm uses  $O(d^2)$  extra  
 1126 space in preprocessing and each iteration. Hence, the total space complexity is  $O(|D|d)$ . □

## 1127 F Sketch Distillation for Fourier Sparse Signals

1128 In Section D, we show an oblivious approach for sketching Fourier sparse signals. However, there  
 1129 are two issues of using this sketching method in Signal estimation: 1. The sketch size too large. 2.  
 1130 The noise in the observed signal could have much larger energy on the sketching set than its average  
 1131 energy. To resolve these two issues, in this section, we propose a method called *sketch distillation* to  
 1132 post-process the sketch obtained in Section D that can reduce the sketch size to  $O(k)$  and prevent  
 1133 the energy of noise being amplified too much. However, we need some extra information about the  
 1134 signal  $x^*(t)$ : we assume that the frequencies of the noiseless signal  $x(t)$  are known. But the sketch  
 1135 distillation process can still be done *partially oblivious*, i.e., we do not need to access/sample the  
 1136 signal.

1137 In Section F.1, we show our distillation algorithms for one-dimensional signals.



## 1138 F.1 Sketch distillation for one-dimensional signals

1139 In this section, we show how to distill the sketch produced by Lemma D.2 from  $O(k \log k)$ -size to  
1140  $O(k)$ -size, using an  $\varepsilon$ -well-balanced sampling procedure developed in Section E.

1141 **Lemma F.1** (Fast distillation for one-dimensional signal). *Given  $f_1, f_2, \dots, f_k \in \mathbb{R}$ . Let  $x^*(t) =$   
1142  $\sum_{j=1}^k v_j \exp(2\pi i f_j t)$ . Let  $\eta = \min_{i \neq j} |f_j - f_i|$ . For any accuracy parameter  $\varepsilon \in (0, 0.1)$ , there  
1143 is an algorithm FASTDISTILL1D (Algorithm 7) that runs in  $O(\varepsilon^{-2} k^{\omega+1})$ -time and outputs a set  
1144  $S \subset [-T, T]$  of size  $s = O(k/\varepsilon^2)$  and a weight vector  $w \in \mathbb{R}_{\geq 0}^s$  such that,*

$$(1 - \varepsilon) \|x^*(t)\|_T \leq \|x^*(t)\|_{S,w} \leq (1 + \varepsilon) \|x^*(t)\|_T$$

1145 holds with probability 0.99.

1146 Furthermore, for any noise signal  $g(t)$ , the following holds with high probability:

$$\|g\|_{S,w}^2 \lesssim \|g\|_T^2,$$

1147 where  $\|x\|_T^2 := \frac{1}{2T} \int_{-T}^T |x(t)|^2 dt$ .

1148 *Proof.* For the convenient, in the proof, we use time duration  $[-T, T]$ . Let  $D(t)$  be defined as  
1149 follows:

$$D(t) = \begin{cases} c/(1 - |t|/T), & \text{for } |t| \leq T(1 - 1/k) \\ c \cdot k, & \text{for } |t| \in [T(1 - 1/k), T] \end{cases}$$

1150 where  $c = O(T^{-1} \log^{-1}(k))$  a fixed value such that  $\int_{-T}^T D(t) dt = 1$ .

1151 First, we randomly pick up a set  $S_0 = \{t_1, \dots, t_{s_0}\}$  of  $s_0 = O(\varepsilon_0^{-2} k \log(k) \log(1/\rho_0))$  i.i.d.  
1152 samples from  $D(t)$ , and let  $w'_i := 2/(T s_0 D(t_i))$  for  $i \in [s_0]$  be the weight vector, where  $\varepsilon_0, \rho_0$  are  
1153 parameters to be chosen later.

1154 By Lemma D.2, we know that  $(S_0, w')$  gives a good weighted sketch of the signal that can preserve  
1155 the norm with high probability. More specifically, with probability  $1 - \rho_0$ ,

$$(1 - \varepsilon_0) \|x^*(t)\|_T^2 \leq \|x^*(t)\|_{S_0, w'}^2 \leq (1 + \varepsilon_0) \|x^*(t)\|_T^2. \quad (8)$$

1156 Then, we will select  $s = O(k/\varepsilon_1^2)$  elements from  $S_0$  and output the corresponding weights  
1157  $w_1, w_2, \dots, w_s$  by applying RANDBSS+ with the following parameter: replacing  $d$  by  $k$ ,  $\varepsilon$  by  
1158  $\varepsilon_1^2$ , and  $D$  by  $D(t_i) = w'_i / \sum_{j \in [s_0]} w'_j$  for  $i \in [s_0]$ .

1159 By Theorem E.3 and the property of WBSP (Definition E.1), we obtain that with probability 0.995,

$$(1 - \varepsilon_1) \|x^*(t)\|_{S_0, w'}^2 \leq \|x^*(t)\|_{S, w}^2 \leq (1 + \varepsilon_1) \|x^*(t)\|_{S_0, w'}^2.$$

1160 Combining with Eq. (8), we conclude that

$$\begin{aligned} \|x^*\|_{S, w}^2 &\in [1 - \varepsilon_1, 1 + \varepsilon_1] \cdot \|x^*\|_{S_0, w'}^2 \\ &\in [(1 - \varepsilon_0)(1 - \varepsilon_1), (1 + \varepsilon_0)(1 + \varepsilon_1)] \cdot \|x^*\|_T^2 \\ &\in [1 - \varepsilon, 1 + \varepsilon] \cdot \|x^*\|_T^2, \end{aligned}$$

1161 where the second step follows from Eq. (8) and the last step follows by taking  $\varepsilon_0 = \varepsilon_1 = \varepsilon/4$ .

1162 The overall success probability follows by taking union bound over the two steps and taking  $\rho_0 =$   
1163 0.001. The running time of Algorithm 7 follows from Claim F.2. And the furthermore part follows  
1164 from Claim F.3.

1165 The proof of the lemma is then completed.  $\square$

**Claim F.2** (Running time of Procedure FASTDISTILL1D in Algorithm 7). *Procedure FASTDIS-*  
*TILL1D in Algorithm 7 runs in*

$$O(\varepsilon^{-2} k^{\omega+1})$$

1166 *time.*

---

**Algorithm 7** Fast distillation for one-dimensional signal

---

```

1: procedure WEIGHTEDSKETCH( $k, \varepsilon, T, \mathcal{B}$ ) ▷ Lemma D.2
2:    $c \leftarrow O(T^{-1} \log^{-1}(k))$ 
3:    $D(t)$  is defined as follows:
      
$$D(t) \leftarrow \begin{cases} c/((1 - |t|/T) \log k), & \text{if } |t| \leq T(1 - 1/k), \\ c \cdot k, & \text{if } |t| \in [T(1 - 1/k), T]. \end{cases}$$

4:    $S_0 \leftarrow O(\varepsilon^{-2} k \log(k))$  i.i.d. samples from  $D$ 
5:   for  $t \in S_0$  do
6:      $w_t \leftarrow \frac{2}{T \cdot |S_0| \cdot D(t)}$ 
7:   end for
8:   Set a new distribution  $D'(t) \leftarrow w_t / \sum_{t' \in S_0} w_{t'}$  for all  $t \in S_0$ 
9:   return  $D'$ 
10: end procedure
11: procedure FASTDISTILL1D( $k, \varepsilon, F = \{f_1, \dots, f_k\}, T$ ) ▷ Lemma F.1
12:   Distribution  $D' \leftarrow \text{WEIGHTEDSKETCH}(k, \varepsilon, T, \mathcal{B})$ 
13:   Set the function family  $\mathcal{F}$  as follows:
      
$$\mathcal{F} := \left\{ f(t) = \sum_{j=1}^k v_j \exp(2\pi i f_j t) \mid v_j \in \mathbb{C} \right\}.$$

14:    $s, \{t_1, t_2, \dots, t_s\}, w \leftarrow \text{RANDBSS+}(k, \mathcal{F}, D', (\varepsilon/4)^2)$  ▷  $s = O(k/\varepsilon^2)$ , Algorithm 3
15:   return  $\{t_1, t_2, \dots, t_s\}$  and  $w$ 
16: end procedure

```

---

1167 *Proof.* First, it is easy to see that Procedure WEIGHTEDSKETCH takes  $O(\varepsilon^{-2} k \log(k))$ -time.  
 1168 By Theorem E.3 with  $|D| = O(\varepsilon^{-2} k \log(k))$ ,  $d = k$ , we have that the running time of Procedure  
 1169 RANDBSS+ is

$$\begin{aligned} & O(k^2 \cdot \varepsilon^{-2} k \log(k) + \varepsilon^{-2} k^3 \log(\varepsilon^{-2} k \log(k)) + \varepsilon^{-2} k^{\omega+1}) \\ & = O(\varepsilon^{-2} k^{\omega+1}). \end{aligned}$$

1170 Hence, the total running time of Algorithm 7 is  $O(\varepsilon^{-2} k^{\omega+1})$ .

1171 □

1172 **Claim F.3** (Preserve the energy of noise). *Let  $(S, w)$  be the outputs of Algorithm 7. Then, we have*  
 1173 *that*

$$\|g(t)\|_{S,w}^2 \lesssim \|g(t)\|_T^2,$$

1174 *holds with probability 0.99.*

1175 *Proof.* For the convenient, in the proof, we use time duration  $[-T, T]$ . Algorithm 7 has two stages of  
 1176 sampling.

1177 In the first stage, Procedure WEIGHTEDSKETCH samples a set  $S_0 = \{t'_1, \dots, t'_{s_0}\}$  of i.i.d. samples  
 1178 from the distribution  $D$ , and a weight vector  $w'$ . Then, we have

$$\begin{aligned} \mathbb{E} [\|g(t)\|_{S_0, w'}^2] &= \mathbb{E} \left[ \sum_{i=1}^{s_0} w'_i |g(t'_i)|^2 \right] \\ &= \sum_{i=1}^{s_0} \mathbb{E}_{t'_i \sim D} [w'_i |g(t'_i)|^2] \\ &= \sum_{i=1}^{s_0} \mathbb{E}_{t'_i \sim D} \left[ \frac{2}{T s_0 D(t'_i)} |g(t'_i)|^2 \right] \end{aligned}$$

$$\begin{aligned}
&= \sum_{i=1}^{s_0} \mathbb{E}_{t'_i \sim \text{Uniform}([-T, T])} [s_0^{-1} |g(t'_i)|^2] \\
&= \mathbb{E}_{t \sim \text{Uniform}([-T, T])} [|g(t)|^2] \\
&= \|g(t)\|_T^2
\end{aligned}$$

1179 where the first step follows from the definition of the norm, the third step follows from the definition  
1180 of  $w_i$ , the forth step follows from  $\mathbb{E}_{t \sim D_0(t)} [\frac{D_1(t)}{D_0(t)} f(t)] = \mathbb{E}_{t \sim D_1(t)} f(t)$ .

1181 In the second stage, let  $P$  denote the Procedure RANDBSS+. With high probability,  $P$  is a  $\varepsilon$ -WBSP  
1182 (Definition E.1). By the Definition E.1, each sample  $t_i \sim D_i(t)$  and  $w_i = \alpha_i \cdot \frac{D'(t_i)}{D_i(t_i)}$  in every iteration  
1183  $i \in [s]$ , where  $\sum_{i=1}^s \alpha_i \leq 5/4$  and  $D'(t) = \frac{w'_t}{\sum_{t' \in S_0} w'_{t'}}$ . As a result,

$$\begin{aligned}
\mathbb{E}_P [\|g(t)\|_{S,w}^2] &= \mathbb{E}_P \left[ \sum_{i=1}^s w_i |g(t_i)|^2 \right] \\
&= \sum_{i=1}^s \mathbb{E}_{t_i \sim D_i(t_i)} [w_i |g(t_i)|^2] \\
&= \sum_{i=1}^s \mathbb{E}_{t_i \sim D_i(t_i)} \left[ \alpha_i \cdot \frac{D'(t_i)}{D_i(t_i)} |g(t_i)|^2 \right] \\
&= \sum_{i=1}^s \mathbb{E}_{t_i \sim D'(t_i)} [\alpha_i |g(t_i)|^2] \\
&\leq \sup_P \left\{ \sum_{i=1}^s \alpha_i \right\} \mathbb{E}_{t \sim D'(t)} [|g(t)|^2] \\
&= \sup_P \left\{ \sum_{i=1}^s \alpha_i \right\} \|g(t)\|_{S_0, w'}^2 \cdot \left( \sum_{t' \in S_0} w'_{t'} \right)^{-1} \\
&\lesssim \rho^{-1} \cdot \|g(t)\|_{S_0, w'}^2.
\end{aligned}$$

1184 where the first step follows from the definition of the norm, the third step follows from  $w_i =$   
1185  $\alpha_i \cdot \frac{D'(t_i)}{D_i(t_i)}$ , the forth step follows from  $\mathbb{E}_{t \sim D_0(t)} [\frac{D_1(t)}{D_0(t)} f(t)] = \mathbb{E}_{t \sim D_1(t)} f(t)$ , the sixth step follows  
1186 from  $D'(t) = \frac{w'_t}{\sum_{t' \in S_0} w'_{t'}}$  and the definition of the norm, the last step follows from  $\sum_{i=1}^s \alpha_i \leq 5/4$   
1187 and  $(\sum_{t' \in S_0} w'_{t'})^{-1} = O(\rho^{-1})$  with probability at least  $1 - \rho/2$ .

1188 Hence, combining the two stages together, we have

$$\mathbb{E}_P [\|g(t)\|_{S,w}^2] \lesssim \rho^{-1} \cdot \mathbb{E} [\|g(t)\|_{S_0, w'}^2] = \rho^{-1} \cdot \|g\|_T^2.$$

1189 And by Markov inequality and union bound, we have

$$\Pr [\|g(t)\|_{S,w}^2 \lesssim \rho^{-2} \|g(t)\|_T^2] \leq 1 - \rho.$$

1190 □

### 1191 F.1.1 Sharper bound for the energy of orthogonal part of noise

1192 In this section, we give a sharper analysis for the energy of  $g^\perp$  on the sketch, which is the orthogonal  
1193 projection of  $g$  to the space  $\mathcal{F}$ . More specifically, we can decompose an arbitrary function  $g$  into  
1194  $g^\parallel + g^\perp$ , where  $g^\parallel \in \mathcal{F}$  and  $\int_{[0, T]} h(t) g^\perp(t) dt = 0$  for all  $h \in \mathcal{F}$ . The motivation of considering  $g^\perp$   
1195 is that  $g^\parallel$  is also a Fourier sparse signal and its energy will not be amplified in the Signal Estimation  
1196 problem. And the nontrivial part is to avoid the blowup of the energy of  $g^\perp$ , which is shown in the  
1197 following lemma:

1198 **Lemma F.4** (Preserving the orthogonal energy). *Let  $\mathcal{F}$  be an  $m$ -dimensional linear function family*  
1199 *with an orthonormal basis  $\{v_1, \dots, v_m\}$  with respect to a distribution  $D$ . Let  $P$  be the  $\varepsilon$ -WBSP that*

1200 generate a sample set  $S = \{t_1, \dots, t_s\}$  and coefficients  $\alpha \in \mathbb{R}_{>0}^s$ , where each  $t_i$  is sampled from  
 1201 distribution  $D_i$  for  $i \in [s]$ . Define the weight vector  $w \in \mathbb{R}^s$  be such that  $w_i := \alpha_i \frac{D(t_i)}{D_i(t_i)}$  for  $i \in [s]$ .  
 1202 For any noise function  $g(t)$  that is orthogonal to  $\mathcal{F}$  with respect to  $D$ , the following property holds  
 1203 with probability 0.99:

$$\sum_{i=1}^m |\langle g, v_i \rangle_{S,w}|^2 \lesssim \varepsilon \|g\|_D^2,$$

1204 where  $\langle g, v \rangle_{S,w} := \sum_{j=1}^s w_j \overline{v(t_j)} g(t_j)$ .

1205 **Remark F.5.** We note that this lemma works for both continuous and discrete signals.

1206 **Remark F.6.**  $|\langle g, v_i \rangle_{S,w}|^2$  corresponds to the energy of  $g$  on the sketch points in  $S$ . On the other  
 1207 hand, if we consider the energy on the whole time domain, we have  $\langle g, v_i \rangle = 0$  for all  $i \in [m]$ . The  
 1208 above lemma indicates that this part of energy could be amplified by at most  $O(\varepsilon)$ , as long as the  
 1209 sketch comes from a WBSP.

1210 *Proof.* We can upper-bound the expectation of  $\sum_{i=1}^m |\langle g, v_i \rangle_{S,w}|^2$  as follows:

$$\begin{aligned} \mathbb{E} \left[ \sum_{i=1}^m |\langle g, v_i \rangle_{S,w}|^2 \right] &= \mathbb{E}_{D_1, \dots, D_s} \left[ \|w\|_1^2 \sum_{i=1}^m \left| \mathbb{E}_{t \sim D'} [\overline{v_j(t)} g(t)] \right|^2 \right] \\ &= \mathbb{E}_{D_1, \dots, D_s} \left[ \sum_{i=1}^m \left| \sum_{j=1}^s w_j \overline{v_i(t_j)} g(t_j) \right|^2 \right] \\ &= \sum_{i=1}^m \mathbb{E}_{D_1, \dots, D_s} \left[ \left| \sum_{j=1}^s w_j \overline{v_i(t_j)} g(t_j) \right|^2 \right] \\ &= \sum_{i=1}^m \mathbb{E}_{D_1, \dots, D_s} \left[ \sum_{j=1}^s w_j^2 |v_i(t_j)|^2 |g(t_j)|^2 \right] \\ &= \sum_{j=1}^s \mathbb{E}_{D_j} \left[ \sum_{i=1}^m w_j |v_i(t_j)|^2 \cdot w_j |g(t_j)|^2 \right] \\ &\leq \sum_{j=1}^s \sup_{t \in D_j} \left\{ w_j \sum_{i=1}^m |v_i(t)|^2 \right\} \cdot \mathbb{E}_{D_j} [w_j |g(t_j)|^2], \end{aligned}$$

1211 where the first step follows from Fact F.7, the second step follows from the definition of  $D'$ , the third  
 1212 follows from the linearity of expectation, the fourth step follows from Fact F.8, the last step follows by  
 1213 pulling out the maximum value of  $w_j \sum_{i=1}^k |v_i(t)|^2$  from the expectation.

1214 Next, we consider the first term:

$$\begin{aligned} \sup_{t \in D_j} \left\{ w_j \sum_{i=1}^m |v_i(t)|^2 \right\} &= \sup_{t \in D_j} \left\{ \alpha_j \frac{D(t)}{D_j(t)} \sum_{i=1}^m |v_i(t)|^2 \right\} \\ &= \alpha_j \sup_{t \in D_j} \left\{ \frac{D(t)}{D_j(t)} \sup_{h \in \mathcal{F}} \left\{ \frac{|h(t)|^2}{\|h\|_D^2} \right\} \right\} \\ &= \alpha_j K_{\mathcal{IS}, D_j}. \end{aligned}$$

1215 where the first step follows from the definition of  $w_j$ , the second step follows from Fact F.9 that

1216  $\sup_{h \in \mathcal{F}} \left\{ \frac{|h(t_j)|^2}{\|h\|_D^2} \right\} = \sum_{i=1}^k |v_i(t_j)|^2$ , the last step follows from the definition of  $K_{\mathcal{IS}, D_j}$  (Eq. (5)).

1217 Then, we bound the last term:

$$\mathbb{E}_{D_j} [w_j |g(t_j)|^2] = \mathbb{E}_{t_j \sim D_j} \left[ \alpha_j \frac{D(t_j)}{D_j(t_j)} |g(t_j)|^2 \right] = \alpha_j \mathbb{E}_{t_j \sim D} [|g(t_j)|^2] = \alpha_j \|g\|_D^2.$$

1218 Combining the two terms together, we have

$$\begin{aligned}\mathbb{E} \left[ \sum_{i=1}^m |\langle g, v_i \rangle_{S,w}|^2 \right] &\leq \sum_{j=1}^s (\alpha_j K_{\text{IS}, D_j} \cdot \alpha_j \|g\|_D^2) \\ &\leq \left( \sum_{j=1}^s \alpha_j \right) \cdot \max_{j \in [s]} \{ \alpha_j K_{\text{IS}, D_j} \} \cdot \|g\|_D^2 \\ &\leq \varepsilon \|g\|_D^2.\end{aligned}$$

1219 where the last step follows from  $P$  being a  $\varepsilon$ -WBSP (Definition E.1), which implies that  $\sum_{j=1}^s \alpha_j = \frac{5}{4}$   
 1220 and  $\alpha_j K_{\text{IS}, D_j} \leq \varepsilon/2$  for all  $j \in [s]$ .

1221 Finally, by Markov's inequality, we have that

$$\sum_{i=1}^m |\langle g, v_i \rangle_{S,w}|^2 \lesssim \varepsilon \|g\|_D^2$$

1222 holds with probability 0.99. □

**Fact F.7.**

$$\sum_{i=1}^m |\langle g, v_i \rangle_{S,w}|^2 = \|w\|_1^2 \cdot \sum_{i=1}^m \left| \mathbb{E}_{t \sim D'} [\overline{v_i(t)} g(t)] \right|^2,$$

1223 where  $D'$  is a distribution defined by  $D'(t_i) := \frac{w_i}{\|w\|_1}$  for  $i \in [s]$ .

1224 *Proof.* We have:

$$\begin{aligned}\sum_{i=1}^m |\langle g, v_i \rangle_{S,w}|^2 &= \sum_{i=1}^m \left| \sum_{j=1}^s w_j \overline{v_i(t_j)} g(t_j) \right|^2 \\ &= \sum_{i=1}^m \left| \sum_{j=1}^s \frac{w_j \overline{v_i(t_j)} g(t_j)}{\sum_{j'=1}^s w_{j'}} \right|^2 \cdot \left( \sum_{j'=1}^s w_{j'} \right)^2 \\ &= \left( \sum_{j'=1}^s w_{j'} \right)^2 \cdot \sum_{i=1}^m \left| \mathbb{E}_{t \sim D'} [\overline{v_i(t)} g(t)] \right|^2.\end{aligned}$$

1225 □

1226 **Fact F.8.** For any  $i \in [m]$ , we have

$$\mathbb{E}_{D_1, \dots, D_s} \left[ \left| \sum_{j=1}^s w_j \overline{v_i(t_j)} g(t_j) \right|^2 \right] = \mathbb{E}_{D_1, \dots, D_s} \left[ \sum_{j=1}^m w_j^2 |v_i(t_j)|^2 |g(t_j)|^2 \right].$$

1227 *Proof.* We first show that for any  $i \in [m]$  and  $j \in [s]$ ,

$$\begin{aligned}\mathbb{E}_{t_j \sim D_j} [w_j \overline{v_i(t_j)} g(t_j)] &= \mathbb{E}_{t_j \sim D_j} \left[ \alpha_j \frac{D(t_j)}{D_j(t_j)} \overline{v_i(t_j)} g(t_j) \right] \\ &= \alpha_j \mathbb{E}_{t_j \sim D} [\overline{v_i(t_j)} g(t_j)] \\ &= 0.\end{aligned} \tag{9}$$

1228 where the first step follows from the definition of  $w_i$ , the third step follows from  $g(t)$  is orthonormal  
 1229 with  $v_i(t)$  for any  $i \in [k]$ .

1230 Then, we can expand LHS as follows:

$$\mathbb{E}_{D_1, \dots, D_s} \left[ \left| \sum_{j=1}^s w_j \overline{v_i(t_j)} g(t_j) \right|^2 \right]$$

$$\begin{aligned}
&= \mathbb{E}_{D_1, \dots, D_s} \left[ \left( \sum_{j=1}^s w_j \overline{v_i(t_j)} g(t_j) \right)^* \left( \sum_{j=1}^s w_j \overline{v_i(t_j)} g(t_j) \right) \right] \\
&= \mathbb{E}_{D_1, \dots, D_s} \left[ \sum_{j, j'=1}^s w_j w_{j'} \overline{v_i(t_j)} g(t_j) \overline{v_i(t_{j'})} g(t_{j'}) \right] \\
&= \sum_{j, j'=1}^s \mathbb{E}_{D_1, \dots, D_s} [w_j w_{j'} \overline{v_i(t_j)} g(t_j) \overline{v_i(t_{j'})} g(t_{j'})] \\
&= \sum_{j=1}^s \mathbb{E}[w_j^2 |v_i(t_j)|^2 |g(t_j)|^2] + \sum_{1 \leq j < j' \leq s} 2\Re \mathbb{E}_{D_1, \dots, D_j} [w_j w_{j'} \overline{v_i(t_j)} g(t_j) \overline{v_i(t_{j'})} g(t_{j'})] \\
&= \text{RHS} + \sum_{1 \leq j < j' \leq s} 2\Re \mathbb{E}_{D_1, \dots, D_j} [w_j \overline{v_i(t_j)} g(t_j)] \mathbb{E}_{D_{j+1}, \dots, D_{j'}} [w_{j'} \overline{v_i(t_{j'})} g(t_{j'})] \\
&= \text{RHS} + \sum_{1 \leq j < j' \leq s} 2\Re \mathbb{E}_{D_1, \dots, D_j} [w_j \overline{v_i(t_j)} g(t_j)] \cdot 0 \\
&= \text{RHS},
\end{aligned}$$

1231 where the third step follows from the linearity of expectation, the fifth step follows from  $t_j$  only  
1232 depends on  $t_1, \dots, t_{j-1}$ , and the sixth step follows from Eq. (9).  $\square$

1233 **Fact F.9.** Let  $\{v_1, \dots, v_k\}$  be an orthonormal basis of  $\mathcal{F}$  with respect to the distribution  $D$ . Then,  
1234 we have

$$\sup_{h \in \mathcal{F}} \left\{ \frac{|h(t)|^2}{\|h\|_D^2} \right\} = \sum_{i=1}^k |v_i(t)|^2$$

1235 *Proof.* Then,

$$\begin{aligned}
\sup_{h \in \mathcal{F}} \left\{ \frac{|h(t)|^2}{\|h\|_D^2} \right\} &= \sup_{a \in \mathbb{C}^k} \left\{ \frac{|\sum_{i=1}^k a_i v_i(t)|^2}{\|a\|_2^2} \right\} \\
&= \sup_{a \in \mathbb{C}^k : \|a\|_2=1} \left| \sum_{i=1}^k a_i v_i(t) \right|^2 \\
&= \sum_{i=1}^k |v_i(t)|^2,
\end{aligned}$$

1236 where the first step follows from each  $h \in \mathcal{F}$  can be expanded as  $h = \sum_{i=1}^k a_i v_i$  and  $\|h(t)\|_D^2 = \|a\|_2^2$   
1237 (Fact B.9), the second step follows from the Cauchy-Schwartz inequality and taking  $a = \frac{v(t)}{\|v(t)\|_2}$ .  $\square$

## 1238 G One-dimensional Signal Estimation

1239 In this section, we apply the tools developed in previous sections to show two efficient reductions  
1240 from Frequency Estimation to Signal Estimation for one-dimensional semi-continuous Fourier signals.  
1241 The first reduction in Section G.1 is optimal in sample complexity, which takes linear number of  
1242 samples from the signal but only achieves constant accuracy. The section reduction in Section G.2  
1243 takes nearly-linear number of samples but can achieve very high-accuracy (i.e.,  $(1 + \varepsilon)$ -estimation  
1244 error).

### 1245 G.1 Sample-optimal reduction

1246 The main theorem of this section is Theorem G.1. The optimal sample complexity is achieved via the  
1247 sketch distillation in Lemma F.1.

1248 **Theorem G.1** (Sample-optimal algorithm for one-dimensional Signal Estimation). For  $\eta \in \mathbb{R}$ ,  
1249 let  $\Lambda(\mathcal{B}) \subset \mathbb{R}$  denote the lattice  $\Lambda(\mathcal{B}) = \{c\eta \mid c \in \mathbb{Z}\}$ . Suppose that  $f_1, f_2, \dots, f_k \in \Lambda(\mathcal{B})$ .

1250 Let  $x^*(t) = \sum_{j=1}^k v_j \exp(2\pi i f_j t)$ , and let  $g(t)$  denote the noise. Given observations of the form  
 1251  $x(t) = x^*(t) + g(t)$ ,  $t \in [0, T]$ . Let  $\eta = \min_{i \neq j} |f_j - f_i|$ .

1252 Given  $D, \eta \in \mathbb{R}_+$ . Suppose that there is an algorithm **FREQEST** that

- 1253 • takes  $\mathcal{S}_{\text{freq}}$  samples,
- 1254 • runs in  $\mathcal{T}_{\text{freq}}$ -time, and
- 1255 • outputs a set  $\mathcal{L}$  of frequencies such that with probability 0.99, the following condition holds:

$$\forall i \in [k], \exists f'_i \in \mathcal{L} \text{ s.t. } |f_i - f'_i| \leq \frac{D}{T}.$$

1256 Then, there is an algorithm (Algorithm 8) such that

- 1257 • takes  $O(\tilde{k} + \mathcal{S}_{\text{freq}})$  samples
- 1258 • runs  $O(\tilde{k}^{\omega+1} + \mathcal{T}_{\text{freq}})$  time,
- 1259 • outputs  $y(t) = \sum_{j=1}^{\tilde{k}} v'_j \cdot \exp(2\pi i f'_j t)$  with  $\tilde{k} = O(|\mathcal{L}|(1 + D/(T\eta)))$  such that with  
 1260 probability at least 0.9, we have

$$\|y(t) - x(t)\|_T^2 \lesssim \|g(t)\|_T^2.$$

---

**Algorithm 8** Signal estimation algorithm for one-dimensional signals (sample optimal version)

---

```

1: procedure SIGNALESTIMATIONFAST( $x, k, F, T, \mathcal{B}$ )                                ▷ Theorem G.1
2:    $\varepsilon \leftarrow 0.01$ 
3:    $L \leftarrow \text{FREQEST}(x, k, D, F, T, \mathcal{B})$ 
4:    $\{f'_1, f'_2, \dots, f'_{\tilde{k}}\} \leftarrow \{f \in \Lambda(\mathcal{B}) \mid \exists f' \in L, |f' - f| < D/T\}$ 
5:    $s, \{t_1, t_2, \dots, t_s\}, w \leftarrow \text{FASTDISTILL1D}(\tilde{k}, \sqrt{\varepsilon}, \{f'_i\}_{i \in [\tilde{k}]}, T, \mathcal{B})$       ▷  $\tilde{k}, w \in \mathbb{R}^{\tilde{k}}$ ,
   Algorithm 7
6:    $A_{i,j} \leftarrow \exp(2\pi i f'_j t_i)$ ,  $A \in \mathbb{C}^{s \times \tilde{k}}$ 
7:    $b \leftarrow (x(t_1), x(t_2), \dots, x(t_s))^\top$ 
8:   Solving the following weighted linear regression                                ▷ Fact A.4
   
$$v' \leftarrow \arg \min_{v' \in \mathbb{C}^{\tilde{k}}} \|\sqrt{w} \circ (Av' - b)\|_2.$$

9:   return  $y(t) = \sum_{j=1}^{\tilde{k}} v'_j \cdot \exp(2\pi i f'_j t)$ .
10: end procedure

```

---

1261 *Proof.* First, we recover the frequencies by utilizing the algorithm **FREQEST**. Let  $L$  be the set of  
 1262 frequencies output by the algorithm **FREQEST**( $x, k, D, T, F, \mathcal{B}$ ).

1263 We define  $\tilde{L}$  as follows:

$$\tilde{L} := \left\{ \tilde{f} \in \Lambda(\mathcal{B}) \mid \exists f' \in L, |f' - \tilde{f}| < D/T \right\}.$$

1264 We use  $\tilde{k}$  to denote the size of set  $\tilde{L}$ . And we use  $\tilde{f}_1, \tilde{f}_2, \dots, \tilde{f}_{\tilde{k}}$  to denote the frequencies in the set  
 1265  $\tilde{L}$ . It is easy to see that

$$\tilde{k} \leq |\mathcal{L}|(1 + D/(T\eta)).$$

1266 Next, we focus on recovering magnitude  $v' \in \mathbb{C}^{\tilde{k}}$ . First we run Procedure **FASTDISTILL1D** in  
 1267 Algorithm 7 and obtain a set  $S = \{t_1, t_2, \dots, t_s\} \subset [0, T]$  of size  $s = O(\tilde{k})$  and a weight vector

1268  $w \in \mathbb{R}_{>0}^s$ . Then, we sample the signal at  $t_1, \dots, t_s$  and let  $x(t_1), \dots, x(t_s)$  be the samples. Consider  
 1269 the following weighted linear regression problem:

$$\min_{v' \in \mathbb{C}^k} \|\sqrt{w} \circ (Av' - b)\|_2, \quad (10)$$

1270 where  $\sqrt{w} := (\sqrt{w_1}, \dots, \sqrt{w_s})$ , and the coefficients matrix  $A \in \mathbb{C}^{s \times \tilde{k}}$  and the target vector  $b \in \mathbb{C}^s$   
 1271 are defined as follows:

$$A := \begin{bmatrix} \exp(2\pi i \tilde{f}_1 t_1) & \exp(2\pi i \tilde{f}_2 t_1) & \cdots & \exp(2\pi i \tilde{f}_{\tilde{k}} t_1) \\ \exp(2\pi i \tilde{f}_1 t_2) & \exp(2\pi i \tilde{f}_2 t_2) & \cdots & \exp(2\pi i \tilde{f}_{\tilde{k}} t_2) \\ \vdots & \vdots & \ddots & \vdots \\ \exp(2\pi i \tilde{f}_1 t_s) & \exp(2\pi i \tilde{f}_2 t_s) & \cdots & \exp(2\pi i \tilde{f}_{\tilde{k}} t_s) \end{bmatrix} \text{ and } b := \begin{bmatrix} x(t_1) \\ x(t_2) \\ \vdots \\ x(t_s) \end{bmatrix}$$

1272 Then, we output a signal

$$y(t) = \sum_{j=1}^{\tilde{k}} v'_j \cdot \exp(2\pi i \tilde{f}_j t),$$

1273 where  $v'$  is an optimal solution of Eq. (10).

1274 The running time follows from Lemma G.2. And the estimation error guarantee  $\|y(t) - x(t)\|_T \lesssim$   
 1275  $\|g(t)\|_T$  follows from Lemma G.3.

1276 The theorem is then proved.  $\square$

1277 **Lemma G.2** (Running time of Algorithm 8). *Algorithm 8 takes  $O(\tilde{k}^{\omega+1})$ -time, giving the output of*  
 1278 *Procedure FREQUEST.*

1279 *Proof.* At Line 5, we run Procedure FASTDISTILLID, which takes  $O(\tilde{k}^{\omega+1})$ -time by Lemma F.1.

1280 At Line 8, we solve the weighted linear regression, which takes

$$O(s\tilde{k}^{\omega-1}) = O(\tilde{k}^{\omega})$$

1281 time by Fact A.4.

1282 Thus, the total running time is  $O(\tilde{k}^{\omega+1})$ .  $\square$

1283 **Lemma G.3** (Estimation error of Algorithm 8). *Let  $y(t)$  be the output signal of Algorithm 8. With*  
 1284 *high probability, we have*

$$\|y(t) - x(t)\|_T \lesssim \|g(t)\|_T.$$

1285 *Proof.* We have

$$\begin{aligned} \|y(t) - x(t)\|_T &\leq \|y(t) - x^*(t)\|_T + \|g(t)\|_T \\ &\leq (1 + \varepsilon)\|y(t) - x^*(t)\|_{S,w} + \|g(t)\|_T \\ &\leq (1 + \varepsilon)\|y(t) - x(t)\|_{S,w} + (1 + \varepsilon)\|g(t)\|_{S,w} + \|g(t)\|_T \\ &\leq (1 + \varepsilon)\|x^*(t) - x(t)\|_{S,w} + (1 + \varepsilon)\|g(t)\|_{S,w} + \|g(t)\|_T \\ &\lesssim \|x^*(t) - x(t)\|_{S,w} + \|g(t)\|_T \\ &\lesssim \|x^*(t) - x(t)\|_T + \|g(t)\|_T \\ &\lesssim \|g(t)\|_T, \end{aligned} \quad (11)$$

1286 where the first step follows from triangle inequality, the second step follows from Lemma F.1 with  
 1287 0.99 probability, the third step follows from triangle inequality, the forth step follows from  $y(t)$  is the  
 1288 optimal solution of the linear system, the fifth step follows from Claim F.3, the sixth step follows  
 1289 from Lemma F.1, and the last step follows from the definition of  $g(t)$ .  $\square$



## 1290 G.2 High-accuracy reduction

1291 In this section, we prove Theorem G.4, which achieves  $(1 + \varepsilon)$ -estimation error by a sharper bound  
 1292 on the energy of noise in Lemma F.4.

1293 **Theorem G.4** (High-accuracy algorithm for one-dimensional Signal Estimation). *For  $\eta \in \mathbb{R}$ , let*  
 1294  *$\Lambda(\mathcal{B}) \subset \mathbb{R}$  denote the lattice  $\Lambda(\mathcal{B}) = \{c\eta \mid c \in \mathbb{Z}\}$ . Suppose that  $f_1, f_2, \dots, f_k \in \Lambda(\mathcal{B})$ . Let*  
 1295  *$x^*(t) = \sum_{j=1}^k v_j \exp(2\pi i f_j t)$ , and let  $g(t)$  denote the noise. Given observations of the form*  
 1296  *$x(t) = x^*(t) + g(t)$ ,  $t \in [0, T]$ . Let  $\eta = \min_{i \neq j} |f_j - f_i|$ .*

1297 *Given  $D, \eta \in \mathbb{R}_+$ . Suppose that there is an algorithm FREQUEST that*

- 1298 • *takes  $S_{\text{freq}}$  samples,*
- 1299 • *runs in  $\mathcal{T}_{\text{freq}}$ -time, and*
- 1300 • *outputs a set  $\mathcal{L}$  of frequencies such that, for each  $f_i$ , there exists an  $f'_i \in \mathcal{L}$  with  $|f_i - f'_i| \leq$*   
 1301  *$D/T$ , holds with probability 0.99.*

1302 *Then, there is an algorithm (Algorithm 9) such that*

- 1303 • *takes  $O(\varepsilon^{-1} \tilde{k} \log(\tilde{k}) + S)$  samples,*
- 1304 • *runs  $O(\varepsilon^{-1} \tilde{k}^\omega \log(\tilde{k}) + \mathcal{T})$  time,*
- 1305 • *outputs  $y(t) = \sum_{j=1}^{\tilde{k}} v'_j \cdot \exp(2\pi i f'_j t)$  with  $\tilde{k} = O(|\mathcal{L}|(1 + D/(T\eta)))$  such that with*  
 1306 *probability at least 0.9, we have*

$$\|y(t) - x^*(t)\|_T^2 \leq (1 + \varepsilon) \|g(t)\|_T^2.$$

1307 **Remark G.5.** *For simplicity, we state the constant failure probability. It is straightforward to get*  
 1308 *failure probability  $\rho$  by blowing up a  $\log(1/\rho)$  factor in both samples and running time.*

1309 *Proof.* Let  $L$  be the set of frequencies output by the Frequency Estimation algorithm FREQUEST. We  
 1310 have the guarantee that with probability 0.99, for each true frequency  $f_i$ , there exists an  $f'_i \in \mathcal{L}$  with  
 1311  $|f_i - f'_i| \leq D/T$ . Conditioning on this event, we define a set  $\tilde{L}$  as follows:

$$\tilde{L} := \{f \in \Lambda(\mathcal{B}) \mid \exists f' \in L, |f' - f| < D/T\}.$$

1312 Since we assume that  $\{f_1, \dots, f_k\} \subset \Lambda(\mathcal{B})$ , we have  $\{f_1, \dots, f_k\} \subset \tilde{L}$ . We use  $\tilde{k}$  to denote the size  
 1313 of set  $\tilde{L}$ , and we denote the frequencies in  $\tilde{L}$  by  $\tilde{f}_1, \tilde{f}_2, \dots, \tilde{f}_{\tilde{k}}$ .

1314 Next, we need to recover magnitude  $v' \in \mathbb{C}^{\tilde{k}}$ .

1315 We first run Procedure WEIGHTEDSKETCH in Algorithm 7 and obtain a set  $S = \{t_1, t_2, \dots, t_s\} \subset$   
 1316  $[0, T]$  of size  $s = O(\varepsilon^{-2} \tilde{k} \log(\tilde{k}))$  and a weight vector  $w \in \mathbb{R}_{>0}^s$ . Then, we sample the signal at  
 1317  $t_1, \dots, t_s$  and let  $x(t_1), \dots, x(t_s)$  be the samples. Consider the following weighted linear regression  
 1318 problem:

$$\min_{v' \in \mathbb{C}^{\tilde{k}}} \|\sqrt{w} \circ (Av' - b)\|_2, \quad (12)$$

1319 where  $\sqrt{w} := (\sqrt{w_1}, \dots, \sqrt{w_s})$ , and the coefficients matrix  $A \in \mathbb{C}^{s \times \tilde{k}}$  and the target vector  $b \in \mathbb{C}^s$   
 1320 are defined as follows:

$$A := \begin{bmatrix} \exp(2\pi i \tilde{f}_1 t_1) & \exp(2\pi i \tilde{f}_2 t_1) & \cdots & \exp(2\pi i \tilde{f}_{\tilde{k}} t_1) \\ \exp(2\pi i \tilde{f}_1 t_2) & \exp(2\pi i \tilde{f}_2 t_2) & \cdots & \exp(2\pi i \tilde{f}_{\tilde{k}} t_2) \\ \vdots & \vdots & \ddots & \vdots \\ \exp(2\pi i \tilde{f}_1 t_s) & \exp(2\pi i \tilde{f}_2 t_s) & \cdots & \exp(2\pi i \tilde{f}_{\tilde{k}} t_s) \end{bmatrix} \text{ and } b := \begin{bmatrix} x(t_1) \\ x(t_2) \\ \vdots \\ x(t_s) \end{bmatrix}$$

1321 Note that if  $v'$  corresponds to the true coefficients  $v$ , then we have  $\|\sqrt{w} \circ (Av' - b)\|_2 = \|\sqrt{w} \circ$   
 1322  $g(S)\|_2 = \|g\|_{S,w}$ . Let  $v'$  be the exact solution of the weighted linear regression in Eq. (12), i.e.,

$$v' := \arg \min_{v' \in \mathbb{C}^{\tilde{k}}} \|\sqrt{w} \circ (Av' - b)\|.$$

And we define the output signal to be:

$$y(t) := \sum_{j=1}^{\tilde{k}} v'_j \cdot \exp(2\pi i f'_j t).$$

1323 The estimation error guarantee  $\|y(t) - x^*(t)\|_T \leq (1 + \varepsilon)\|g(t)\|_T$  follows from Lemma G.7. The  
 1324 running time follows from Lemma G.6.

1325 The theorem is then proved.  $\square$

---

**Algorithm 9** Signal estimation algorithm for one-dimensional signals (high-accuracy version)

---

```

1: procedure SIGNALESTIMATIONACC( $x, \varepsilon, k, F, T, \mathcal{B}$ ) ▷ Theorem G.4
2:    $L \leftarrow \text{FREQUEST}(x, k, D, F, T, \mathcal{B})$ 
3:    $\{f'_1, f'_2, \dots, f'_{\tilde{k}}\} \leftarrow \{f \in \Lambda(\mathcal{B}) \mid \exists f' \in L, |f' - f| < D/T\}$ 
4:    $s, \{t_1, t_2, \dots, t_s\}, w \leftarrow \text{WEIGHTEDSKETCH}(\tilde{k}, \sqrt{\varepsilon}, T, \mathcal{B})$  ▷  $\tilde{k}, w \in \mathbb{R}^{\tilde{k}}$ , Algorithm 7
5:    $A_{i,j} \leftarrow \exp(2\pi i f'_j t_i), A \in \mathbb{C}^{s \times \tilde{k}}$ 
6:    $b \leftarrow (x(t_1), x(t_2), \dots, x(t_s))^T$ 
7:   Solving the following weighted linear regression ▷ Fact A.4
      
$$v' \leftarrow \arg \min_{v' \in \mathbb{C}^{\tilde{k}}} \|\sqrt{w} \circ (Av' - b)\|_2.$$

8:   return  $y(t) = \sum_{j=1}^{\tilde{k}} v'_j \cdot \exp(2\pi i f'_j t).$ 
9: end procedure

```

---

1326 **Lemma G.6** (Running time of Algorithm 9). *Algorithm 9 takes  $O(\varepsilon^{-1} \tilde{k}^\omega \log(\tilde{k}))$ -time, giving the*  
 1327 *output of Procedure FREQUEST.*

1328 *Proof.* At Line 7, the regression solver takes

$$O(s \tilde{k}^{\omega-1}) = O(\varepsilon^{-1} \tilde{k} \log(\tilde{k}) \cdot \tilde{k}^{\omega-1}) = O(\varepsilon^{-1} \tilde{k}^\omega \log(\tilde{k}))$$

1329 time. The remaining part of Algorithm 9 takes at most  $O(s)$ -time.  $\square$

1330 **Lemma G.7** (Estimation error of Algorithm 9). *Let  $y(t)$  be the output signal of Algorithm 9. With*  
 1331 *high probability, we have*

$$\|y(t) - x^*(t)\|_T \leq (1 + \varepsilon)\|g(t)\|_T.$$

1332 *Proof.* Let  $\mathcal{F}$  be the family of signals with frequencies in  $\tilde{L}$ :

$$\mathcal{F} = \left\{ h(t) = \sum_{j=1}^{\tilde{k}} v_j \cdot e^{2\pi i \tilde{f}_j t} \mid \forall v_j \in \mathbb{C}, j \in [\tilde{k}] \right\}.$$

1333 Suppose the dimension of  $\mathcal{F}$  is  $m \leq k$ . Let  $\{u_1, u_2, \dots, u_m\}$  be an orthonormal basis of  $\mathcal{F}$ , i.e.,

$$\frac{1}{T} \int_{[0,T]} u_i(t) \overline{u_j(t)} dt = \mathbf{1}_{i=j}, \quad \forall i, j \in [m],$$

1334 On the other hand, since  $u_i \in \mathcal{F}$ , we can also expand these basis vectors in the Fourier basis. Let  
 1335  $V \in \mathbb{C}^{m \times \tilde{k}}$  be an linear transformation<sup>7</sup> such that

$$u_i = \sum_{j=1}^{\tilde{k}} V_{i,j} \cdot \exp(2\pi i \tilde{f}_j t) \quad \forall i \in [m].$$

---

<sup>7</sup>When  $m < \tilde{k}$ ,  $V$  is not unique, and we take any one of such linear transformation.

1336 Then, we have

$$\begin{bmatrix} \exp(2\pi\mathbf{i}\tilde{f}_1 t) \\ \vdots \\ \exp(2\pi\mathbf{i}\tilde{f}_{\tilde{k}} t) \end{bmatrix} = V^+ \cdot \begin{bmatrix} u_1 \\ \vdots \\ u_m \end{bmatrix},$$

1337 where  $V^+ \in \mathbb{C}^{\tilde{k} \times m}$  is the pseudoinverse of  $V$ ; or equivalently, the  $i$ -th row of  $V^+$  contains the  
 1338 coefficients of expanding  $\exp(2\pi\mathbf{i}\tilde{f}_i t)$  under  $\{u_1, \dots, u_m\}$ . Define a linear operator  $\alpha : \mathcal{F} \rightarrow \mathbb{C}^m$   
 1339 such that for any  $h(t) = \sum_{j=1}^{\tilde{k}} v_j \exp(2\pi\mathbf{i}f_j t)$ ,

$$\alpha(h) := V^+ \cdot v,$$

1340 which gives the coefficients of  $h$  under the basis  $\{u_1, \dots, u_{\tilde{k}}\}$ .

1341 Define an  $s$ -by- $m$  matrix  $B$  as follows:

$$B := A \cdot V^\top = \begin{bmatrix} u_1(t_1) & u_2(t_1) & \cdots & u_m(t_1) \\ u_1(t_2) & u_2(t_2) & \cdots & u_m(t_2) \\ \vdots & \vdots & \ddots & \vdots \\ u_1(t_s) & u_2(t_s) & \cdots & u_m(t_s) \end{bmatrix}.$$

1342  $B = AV$ . It is easy to see that  $\text{Im}(B) = \text{Im}(A)$ . Thus, solving Eq. (12) is equivalent to solving:

$$\min_{z \in \mathbb{C}^m} \|\sqrt{w} \circ (Bz - b)\|_2. \quad (13)$$

1343 Since  $y(t)$  is an solution of Eq. (12), we also know that  $\alpha(y)$  is an solution of Eq. (13).

1344 For convenience, we define some notations. Let  $\sqrt{W} := \text{diag}(\sqrt{w})$  and define

$$\begin{aligned} B_w &:= \sqrt{W} \cdot B, \\ X_w &:= \sqrt{W} \cdot [x(t_1) \quad x(t_2) \quad \cdots \quad x(t_s)]^\top \\ X_w^* &:= \sqrt{W} \cdot [x^*(t_1) \quad x^*(t_2) \quad \cdots \quad x^*(t_s)]^\top \end{aligned}$$

1345 By Fact A.4, we know that the solution of the weighted linear regression Eq. (13) has the following  
 1346 closed form:

$$\alpha(y) = (B^* W B)^{-1} B^* W b = (B_w^* B_w)^{-1} B_w^* X_w. \quad (14)$$

1347 Then, consider the noise in the signal. Since  $g$  is an arbitrary noise, let  $g^\parallel$  be the projection of  $g(x)$  to  
 1348  $\mathcal{F}$  and  $g^\perp = g - g^\parallel$  be the orthogonal part to  $\mathcal{F}$  such that

$$g^\parallel(t) \in \mathcal{F}, \text{ and } \int_{[0, T]} g^\parallel(t) \overline{g^\perp(t)} dt = 0.$$

1349 Similarly, we also define

$$\begin{aligned} g_w &:= \sqrt{W} \cdot [g(t_1) \quad g(t_2) \quad \cdots \quad g(t_s)]^\top \\ g_w^\parallel &:= \sqrt{W} \cdot [g^\parallel(t_1) \quad g^\parallel(t_2) \quad \cdots \quad g^\parallel(t_s)]^\top, \\ g_w^\perp &:= \sqrt{W} \cdot [g^\perp(t_1) \quad g^\perp(t_2) \quad \cdots \quad g^\perp(t_s)]^\top. \end{aligned}$$

1350 By Claim G.8, the error can be decomposed into two terms:

$$\|y(t) - x^*(t)\|_T \leq \|(B_w^* B_w)^{-1} B_w^* \cdot g_w^\perp\|_2 + \|(B_w^* B_w)^{-1} B_w^* \cdot g_w^\parallel\|_2.$$

1351 By Claim G.10, we have

$$\|(B_w^* B_w)^{-1} B_w^* \cdot g_w^\perp\|_2^2 \lesssim \varepsilon \|g^\perp(t)\|_T^2.$$

1352 And by Claim G.13, we have

$$\|(B_w^* B_w)^{-1} B_w^* \cdot g_w^\parallel\|_2^2 = \|g^\parallel\|_T^2.$$

1353 Combining them together (and re-scaling  $\varepsilon$  be an constant factor), we have that

$$\|y(t) - x^*(t)\|_T \leq \|g^\parallel\|_T + \sqrt{\varepsilon}\|g^\perp\|_T.$$

1354 Since  $\|g^\parallel\|_T^2 + \|g^\perp\|_T^2 = \|g\|_T^2$ , by Cauchy–Schwarz inequality, we have that

$$(\|g^\parallel\|_T + \sqrt{\varepsilon}\|g^\perp\|_T)^2 \leq (\|g^\parallel\|_T^2 + \|g^\perp\|_T^2) \cdot (1 + \varepsilon) = (1 + \varepsilon) \cdot \|g\|_T^2.$$

1355 That is,

$$\|y(t) - x^*(t)\|_T^2 \leq (1 + \varepsilon)\|g(t)\|_T^2.$$

1356 □

**Claim G.8** (Error decomposition).

$$\|y(t) - x^*(t)\|_T \leq \|(B_w^* B_w)^{-1} B_w^* \cdot g_w^\perp\|_2 + \|(B_w^* B_w)^{-1} B_w^* \cdot g_w^\parallel\|_2.$$

1357 *Proof.* Since  $y, x^* \in \mathcal{F}$  and  $\{u_1, \dots, u_{\tilde{k}}\}$  is an orthonormal basis, we have  $\|y - x^*\|_T = \|\alpha(y) -$   
 1358  $\alpha(x^*)\|_2$ . Furthermore, by Eq. (14), we have  $\alpha(y) = (B_w^* B_w)^{-1} B_w^* \cdot X_w$ . And by Fact G.9, since  
 1359  $x^* \in \mathcal{F}$ , we have  $\alpha(x^*) = (B_w^* B_w)^{-1} B_w^* \cdot X_w^*$ .

1360 Thus, we have

$$\begin{aligned} \|\alpha(y) - \alpha(x^*)\|_2 &= \|(B_w^* B_w)^{-1} B_w^* \cdot (X_w - X_w^*)\|_2 \\ &= \|(B_w^* B_w)^{-1} B_w^* \cdot g_w\|_2 \\ &= \|(B_w^* B_w)^{-1} B_w^* \cdot (g_w^\perp + g_w^\parallel)\|_2 \\ &\leq \|(B_w^* B_w)^{-1} B_w^* \cdot g_w^\perp\|_2 + \|(B_w^* B_w)^{-1} B_w^* \cdot g_w^\parallel\|_2 \end{aligned}$$

1361 where the second step follows from the definition of  $g_w$ , the forth step follows from  $g_w = g^\parallel + g^\perp$ ,  
 1362 and the last step follows from triangle inequality.

1363 Hence, we get that  $\|y(t) - x^*(t)\|_T \leq \|(B_w^* B_w)^{-1} B_w^* \cdot g_w^\perp\|_2 + \|(B_w^* B_w)^{-1} B_w^* \cdot g_w^\parallel\|_2$ . □

1364 **Fact G.9.** For any  $h \in \mathcal{F}$ ,

$$\alpha(h) = (B_w^* B_w)^{-1} B_w^* \cdot h_w,$$

1365 where  $h_w = \sqrt{W} [h(t_1) \ \dots \ h(t_s)]^\top$ .

1366 *Proof.* Suppose  $h(t) = \sum_{j=1}^{\tilde{k}} v_j \exp(2\pi i \tilde{f}_j t)$ . We have

$$\begin{aligned} B_w \alpha(h) &= \sqrt{W} B \cdot \alpha(h) \\ &= \sqrt{W} B \cdot (V^+ v) \\ &= h_w, \end{aligned}$$

1367 where the second step follows from  $V^+$  is a change of coordinates.

1368 Hence, by the Moore–Penrose inverse, we have

$$\alpha(h) = B_w^\dagger h_w = (B_w^* B_w)^{-1} B_w^* h_w.$$

1369 □

1370 **Claim G.10** (Bound the first term). *The following holds with high probability:*

$$\|(B_w^* B_w)^{-1} B_w^* \cdot g_w^\perp\|_2^2 \lesssim \varepsilon \|g^\perp(t)\|_T^2.$$

1371 *Proof.* By Lemma D.2, with high probability, we have

$$(1 - \varepsilon)\|x\|_T \leq \|x\|_{S,w} \leq (1 + \varepsilon)\|x\|_T,$$

1372 where  $(S, w)$  is the output of Procedure WEIGHTEDSKETCH. Conditioned on this event, by Lemma  
1373 B.11,

$$\lambda(B_w^* B_w) \in [1 - \varepsilon, 1 + \varepsilon],$$

1374 since  $B_w$  is the same as the matrix  $A$  in the lemma.

1375 Hence,

$$\begin{aligned} \|(B_w^* B_w)^{-1} B_w^* \cdot g_w^\perp\|_2^2 &\leq \lambda_{\max}((B_w^* B_w)^{-1})^2 \cdot \|B_w^* \cdot g_w^\perp\|_2^2 \\ &\leq (1 - \varepsilon)^{-2} \|B_w^* \cdot g_w^\perp\|_2^2 \\ &\lesssim \varepsilon \|g^\perp(t)\|_T^2 \end{aligned}$$

1376 where the second step follows from  $\lambda_{\max}((B_w^* B_w)^{-1}) \leq (1 - \varepsilon)^{-1}$ , and the third step follows from  
1377 Lemma F.4 and Corollary G.12.  $\square$

1378 **Lemma G.11** (Lemma 6.2 of Chen and Price (2019a)). *There exists a universal constant  $C_1$  such*  
1379 *that given any distribution  $D'$  with the same support of  $D$  and any  $\varepsilon > 0$ , the random sampling*  
1380 *procedure with  $m = C_1(K_{D'} \log d + \varepsilon^{-1} K_{D'})$  i.i.d. random samples from  $D'$  and coefficients*  
1381  *$\alpha_1 = \dots = \alpha_m = 1/m$  is an  $\varepsilon$ -well-balanced sampling procedure.*

1382 **Corollary G.12.** *Procedure WEIGHTEDSKETCH in Algorithm 7 is a  $\varepsilon$ -WBSP (Definition E.1).*

**Claim G.13** (Bound the second term).

$$\left\| (B_w^* B_w)^{-1} B_w^* \cdot g_w^\parallel \right\|_2^2 = \|g^\parallel\|_T^2.$$

*Proof.*

$$\|(B_w^* B_w)^{-1} B_w^* \cdot g_w^\parallel\|_2^2 = \|\alpha(g^\parallel)\|_2^2 = \|g^\parallel\|_T^2,$$

1383 where the first step follows from Fact G.9 and  $g^\parallel \in \mathcal{F}$ , the second step follows from the definition of  
1384  $\alpha$ .  $\square$

## 1385 H High-Accuracy Fourier Interpolation Algorithm

1386 In this section, we propose an algorithm for one-dimensional continuous Fourier interpolation  
1387 problem, which significantly improves the accuracy of the algorithm in [Chen et al. \(2016\)](#).

1388 This section is organized as follows. In Sections [H.1](#) and [H.2](#), we provide some technical tools for  
1389 Fourier-sparse signals, low-degree polynomials and filter functions. In Section [H.3](#), we design a high  
1390 sensitivity frequency estimation method using these tools. In Section [H.4](#), we combine the frequency  
1391 estimation with our Fourier set query framework, and give a  $(9 + \varepsilon)$ -approximate Fourier interpolation  
1392 algorithm. Then, in Section [H.5](#), we build a sharper error control, and in Section [H.6](#), we analysis the  
1393 HASHTOBINS procedure. Based on these result, in Section [H.8](#), we develop the ultra-high sensitivity  
1394 frequency estimation method. In Section [H.10](#), we show the a  $(3 + \sqrt{2} + \varepsilon)$ -approximate Fourier  
1395 interpolation algorithm.

### 1396 H.1 Technical tools I: Fourier-polynomial equivalence

1397 In this section, we show that low-degree polynomials and Fourier-sparse signals can be transformed  
1398 to each other with arbitrarily small errors.

1399 The following lemma upper-bounds the error of using low-degree polynomial to approximate Fourier-  
1400 sparse signal.

1401 **Lemma H.1** (Fourier signal to polynomial, [Chen et al. \(2016\)](#)). *For any  $\Delta > 0$  and any  $\delta > 0$ , let*  
1402  *$x^*(t) = \sum_{j \in [k]} v_j e^{2\pi i f_j t}$  where  $|f_j| \leq \Delta$  for each  $j \in [k]$ . There exists a polynomial  $P(t)$  of degree*  
1403 *at most*

$$d = O(T\Delta + k^3 \log k + k \log 1/\delta)$$

1404 *such that*

$$\|P - x^*\|_T^2 \leq \delta \|x^*\|_T^2.$$

1405 As a corollary, we can expand a Fourier-sparse signal under the *mixed Fourier-monomial basis* (i.e.,  
1406  $\{e^{2\pi i f_i t} \cdot t^j\}_{i \in [k], j \in [d]}$ ).

1407 **Corollary H.2** (Mixed Fourier-polynomial approximation). *For any  $\Delta > 0$ ,  $\delta > 0$ ,  $n_j \in \mathbb{Z}_{\geq 0}$ ,  $j \in$   
1408  $[k]$ ,  $\sum_{j \in [k]} n_j = k$ . Let*

$$x^*(t) = \sum_{j \in [k]} e^{2\pi i f_j t} \sum_{i=1}^{n_j} v_{j,i} e^{2\pi i f'_{j,i} t},$$

1409 *where  $|f'_{j,i}| \leq \Delta$  for each  $j \in [k], i \in [n_j]$ . There exist  $k$  polynomials  $P_j(t)$  for  $j \in [k]$  of degree at*  
1410 *most*

$$d = O(T\Delta + k^3 \log k + k \log 1/\delta)$$

1411 *such that*

$$\left\| \sum_{j \in [k]} e^{2\pi i f_j t} P_j(t) - x^*(t) \right\|_T^2 \leq \delta \|x^*(t)\|_T^2.$$

1412 The following lemma bounds the error of approximating a low-degree polynomial using Fourier-  
1413 sparse signal.

1414 **Lemma H.3** (Polynomial to Fourier signal, [Chen et al. \(2016\)](#)). *For any degree- $d$  polynomial*

1415  $Q(t) = \sum_{j=0}^d c_j t^j$ , *any  $T > 0$  and any  $\varepsilon > 0$ , there always exist  $\gamma > 0$  and*

$$x^*(t) = \sum_{j=0}^d \alpha_j e^{2\pi i (\gamma j) t}$$

1416 *with some coefficients  $\alpha_0, \dots, \alpha_d$  such that*

$$\forall t \in [0, T], |x^*(t) - Q(t)| \leq \varepsilon.$$

## 1417 H.2 Technical tools II: filter functions

1418 In this section, we introduce the filter functions  $H$  and  $G$  designed by [Chen et al. \(2016\)](#), and we  
1419 generalize their constructions to achieve higher sensitivity.

1420 We first construct the  $H$ -filter, which uses rect and sinc functions.

1421 **Fact H.4** (rect function Fourier transform). *For  $s > 0$ , let  $\text{rect}_s(t) := \mathbf{1}_{|t| \leq s/2}$ . Then, we have*

$$\widehat{\text{rect}_s}(f) = \text{sinc}(sf) = \frac{\sin(sf)}{\pi sf}.$$

1422 **Definition H.5.** *Given  $s_1, s_2 > 0$  and an even number  $\ell \in \mathbb{N}_+$ , we define the filter function  $H_1(t)$   
1423 and its Fourier transform  $\widehat{H}_1(f)$  as follows:*

$$\begin{aligned} H_1(t) &= s_0 \cdot (\text{sinc}^\ell(s_1 t)) \star \text{rect}_{s_2}(t) \\ \widehat{H}_1(f) &= s_0 \cdot (\text{rect}_{s_1} \star \cdots \star \text{rect}_{s_1})(f) \cdot \text{sinc}(f s_2) \end{aligned}$$

1424 where  $s_0 = C_0 s_1 \sqrt{\ell}$  is a normalization parameter such that  $H_1(0) = 1$ , and  $\star$  means convolution.

1425 **Definition H.6** ( $H$ -filter's construction, [Chen et al. \(2016\)](#)). *Given any  $0 < s_1, s_3 < 1$ ,  $0 < \delta < 1$ ,  
1426 we define  $H_{s_1, s_3, \delta}(t)$  from the filter function  $H_1(t)$  (Definition H.5) as follows:*

- 1427 • let  $\ell := \Theta(k \log(k/\delta))$ ,  $s_2 := 1 - \frac{2}{s_1}$ , and
- 1428 • shrink  $H_1$  by a factor  $s_3$  in time domain, i.e.,

$$H_{s_1, s_3, \delta}(t) := H_1(t/s_3) \tag{15}$$

$$\widehat{H}_{s_1, s_3, \delta}(f) = s_3 \widehat{H}_1(s_3 f) \tag{16}$$

1429 We call the “filtered cluster” around a frequency  $f_0$  to be the support of  $(\delta_{f_0} \star \widehat{H}_{s_1, s_3, \delta})(f)$  in the  
1430 frequency domain and use

$$\Delta_h = |\text{supp}(\widehat{H}_{s_1, s_3, \delta})| = \frac{s_1 \cdot \ell}{s_3} \tag{17}$$

1431 to denote the width of the cluster.

1432 **Lemma H.7** (High sensitivity  $H$ -filter's properties). *Given  $\varepsilon \in (0, 0.1)$ ,  $s_1, s_3 \in (0, 1)$  with  
1433  $\min(\frac{1}{1-s_3}, s_1) \geq \widetilde{O}(k^4)/\varepsilon$ , and  $\delta \in (0, 1)$ . Let the filter function  $H := H_{s_1, s_3, \delta}(t)$  defined in  
1434 Definition H.6. Then,  $H$  satisfies the following properties:*

$$\text{Property I : } H(t) \in [1 - \delta, 1], \text{ when } |t| \leq (\frac{1}{2} - \frac{2}{s_1})s_3.$$

$$\text{Property II : } H(t) \in [0, 1], \text{ when } (\frac{1}{2} - \frac{2}{s_1})s_3 \leq |t| \leq \frac{1}{2}s_3.$$

$$\text{Property III : } H(t) \leq s_0 \cdot (s_1(\frac{|t|}{s_3} - \frac{1}{2}) + 2)^{-\ell}, \text{ when } |t| > \frac{1}{2}s_3.$$

$$\text{Property IV : } \text{supp}(\widehat{H}) \subseteq [-\frac{s_1 \ell}{2s_3}, \frac{s_1 \ell}{2s_3}].$$

1435 For any exact  $k$ -Fourier-sparse signal  $x^*(t)$ , we shift the interval from  $[0, T]$  to  $[-1/2, 1/2]$  and  
1436 consider  $x^*(t)$  for  $t \in [-1/2, 1/2]$  to be our observation, which is also  $x^*(t) \cdot \text{rect}_1(t)$ .

$$\text{Property V : } \int_{-\infty}^{+\infty} |x^*(t) \cdot H(t) \cdot (1 - \text{rect}_1(t))|^2 dt < \delta \int_{-\infty}^{+\infty} |x^*(t) \cdot \text{rect}_1(t)|^2 dt.$$

$$\text{Property VI : } \int_{-\infty}^{+\infty} |x^*(t) \cdot H(t) \cdot \text{rect}_1(t)|^2 dt \in [1 - \varepsilon, 1] \cdot \int_{-\infty}^{+\infty} |x^*(t) \cdot \text{rect}_1(t)|^2 dt.$$

1437 **Remark H.8.** By Property I, and II, and III, we have that  $H(t) \leq 1$  for  $t \in [0, T]$ .

1438 *Proof.* The proof of Property I - V easily follows from [Chen et al. \(2016\)](#). We prove Property VI in  
 1439 below.

1440 First, because of for any  $t$ ,  $|H_1(t)| \leq 1$ , thus we prove the upper bound for LHS,

$$\int_{-\infty}^{+\infty} |x^*(t) \cdot H(t) \cdot \text{rect}_1(t)|^2 dt \leq \int_{-\infty}^{+\infty} |x^*(t) \cdot 1 \cdot \text{rect}_1(t)|^2 dt.$$

1441 Second, as mentioned early, we need to prove the general case when  $s_3 = 1 - 1/\text{poly}(k)$ . Define  
 1442 interval  $S = [-s_3(\frac{1}{2} - \frac{1}{s_1}), s_3(\frac{1}{2} - \frac{1}{s_1})]$ , by definition,  $S \subset [-1/2, 1/2]$ . Then define  $\bar{S} =$   
 1443  $[-1/2, 1/2] \setminus S$ , which is  $[-1/2, -s_3(\frac{1}{2} - \frac{1}{s_1})] \cup (s_3(\frac{1}{2} - \frac{1}{s_1}), 1/2]$ . By Property I, we have

$$\int_S |x^*(t) \cdot H(t)|^2 dt \geq (1 - \delta)^2 \int_S |x^*(t)|^2 dt \quad (18)$$

1444 Then we can show

$$\begin{aligned} & \int_{\bar{S}} |x^*(t)|^2 dt \\ & \leq |\bar{S}| \cdot \max_{t \in [-1/2, 1/2]} |x^*(t)|^2 \\ & \leq (1 - s_3(1 - \frac{2}{s_1})) \cdot O(k^2) \int_{-\frac{1}{2}}^{\frac{1}{2}} |x^*(t)|^2 dt \\ & \leq \varepsilon \int_{-\frac{1}{2}}^{\frac{1}{2}} |x^*(t)|^2 dt \end{aligned} \quad (19)$$

1445 where the first step follows from  $\bar{S} \subset [-1/2, 1/2]$ , the second step follows from Theorem [C.1](#), the  
 1446 third step follows from  $(1 - s_3(1 - \frac{2}{s_1})) \cdot O(k^2) \leq \varepsilon$ .

1447 Combining Equations (18) and (19) gives a lower bound for LHS,

$$\begin{aligned} & \int_{-\infty}^{+\infty} |x^*(t) \cdot H(t) \cdot \text{rect}_1(t)|^2 dt \\ & \geq \int_S |x^*(t) H(t)|^2 dt \\ & \geq (1 - 2\delta) \int_S |x^*(t)|^2 dt \\ & = (1 - 2\delta) \int_{S \cup \bar{S}} |x^*(t)|^2 dt - (1 - 2\delta) \int_{\bar{S}} |x^*(t)|^2 dt \\ & \geq (1 - 2\delta) \int_{S \cup \bar{S}} |x^*(t)|^2 dt - (1 - 2\delta)\varepsilon \int_{S \cup \bar{S}} |x^*(t)|^2 dt \\ & = (1 - 2\delta - \varepsilon) \int_{-\frac{1}{2}}^{\frac{1}{2}} |x^*(t)|^2 dt \\ & \geq (1 - 2\varepsilon) \int_{-\infty}^{+\infty} |x^*(t) \cdot \text{rect}_1(t)|^2 dt, \end{aligned}$$

1448 where the first step follows from  $S \subset [-1/2, 1/2]$ , the second step follows from Eq. (18), the third  
 1449 step follows from  $S \cap \bar{S} = \emptyset$ , the forth step follows from Eq. (19), the fifth step follows from  
 1450  $S \cup \bar{S} = [-1/2, 1/2]$ , the last step follows from  $\varepsilon \gg \delta$ .

1451 □

1452 As remarked in [Chen et al. \(2016\)](#), to match  $(H(t), \hat{H}(f))$  on  $[-1/2, 1/2]$  with signal  $x(t)$  on  $[0, T]$ ,  
 1453 we will scale the time domain from  $[-1/2, 1/2]$  to  $[-T/2, T/2]$  and shift it to  $[0, T]$ . Then, in  
 1454 frequency domain, the Property IV in Lemma [H.7](#) becomes

$$\text{supp}(\hat{H}(f)) \subseteq [-\frac{\Delta_h}{2}, \frac{\Delta_h}{2}], \text{ where } \Delta_h = \frac{s_1 \ell}{s_3 T}. \quad (20)$$



1455 We also need another filter function,  $G$ , whose construction and properties are given below.

1456 **Definition H.9** ( $G$ -filter's construction, [Chen et al. \(2016\)](#)). Given  $B > 1$ ,  $\delta > 0$ ,  $\alpha > 0$ . Let  
 1457  $l := \Theta(\log(k/\delta))$ . Define  $G_{B,\delta,\alpha}(t)$  and its Fourier transform  $\widehat{G_{B,\delta,\alpha}}(f)$  as follows:

$$\begin{aligned} G_{B,\delta,\alpha}(t) &:= b_0 \cdot (\text{rect}_{\frac{B}{\alpha\pi}}(t))^{\star l} \cdot \text{sinc}(t \frac{\pi}{2B}), \\ \widehat{G_{B,\delta,\alpha}}(f) &:= b_0 \cdot (\text{sinc}(\frac{B}{\alpha\pi}f))^l \cdot \text{rect}_{\frac{\pi}{2B}}(f), \end{aligned}$$

1458 where  $b_0 = \Theta(B\sqrt{l}/\alpha)$  is the normalization factor such that  $\widehat{G}(0) = 1$ .

1459 **Lemma H.10** ( $G$ -filter's properties, [Chen et al. \(2016\)](#)). Given  $B > 1$ ,  $\delta > 0$ ,  $\alpha > 0$ , let  $G :=$   
 1460  $G_{B,\delta,\alpha}(t)$  be defined in Definition H.9. Then,  $G$  satisfies the following properties:

$$\begin{aligned} \text{Property I : } \quad & \widehat{G}(f) \in [1 - \delta/k, 1], \text{ if } |f| \leq (1 - \alpha) \frac{2\pi}{2B}. \\ \text{Property II : } \quad & \widehat{G}(f) \in [0, 1], \text{ if } (1 - \alpha) \frac{2\pi}{2B} \leq |f| \leq \frac{2\pi}{2B}. \\ \text{Property III : } \quad & \widehat{G}(f) \in [-\delta/k, \delta/k], \text{ if } |f| > \frac{2\pi}{2B}. \\ \text{Property IV : } \quad & \text{supp}(G(t)) \subset [\frac{l}{2} \cdot \frac{-B}{\pi\alpha}, \frac{l}{2} \cdot \frac{B}{\pi\alpha}]. \\ \text{Property V : } \quad & \max_t |G(t)| \lesssim \text{poly}(B, l). \end{aligned}$$

### 1461 H.3 High sensitivity frequency estimation

1462 In this section, we show a high sensitivity frequency estimation. Compared with the result in [Chen](#)  
 1463 [et al. \(2016\)](#), we relax the condition of the frequencies that can be recovered by the algorithm.

1464 **Definition H.11** (Definition 2.4 in [Chen et al. \(2016\)](#)). Given  $x^*(t) = \sum_{j=1}^k v_j e^{2\pi i f_j t}$ , any  $\mathcal{N} > 0$ ,  
 1465 and a filter function  $H$  with bounded support in frequency domain. Let  $L_j$  denote the interval  
 1466 of  $\text{supp}(e^{2\pi i f_j t} \cdot H)$  for each  $j \in [k]$ . Define an equivalence relation  $\sim$  on the frequencies  $f_i$  as  
 1467 follows:

$$f_i \sim f_j \text{ iff } L_i \cap L_j \neq \emptyset \quad \forall i, j \in [k].$$

1468 Let  $S_1, \dots, S_n$  be the equivalence classes under this relation for some  $n \leq k$ .

Define  $C_i := \bigcup_{f \in S_i} L_i$  for each  $i \in [n]$ . We say  $C_i$  is an  $\mathcal{N}$ -heavy cluster iff

$$\int_{C_i} |\widehat{H \cdot x^*}(f)|^2 df \geq T \cdot \mathcal{N}^2 / k.$$

1469 The following claim gives a tight error bound for approximating the true signal  $x^*(t)$  by the signal  
 1470  $x_{S^*}(t)$  whose frequencies are in heavy-clusters. It improves the Claim 2.5 in [Chen et al. \(2016\)](#).

1471 **Claim H.12** (Approximation by heavy-clusters). Given  $x^*(t) = \sum_{j=1}^k v_j e^{2\pi i f_j t}$  and any  $\mathcal{N} > 0$ , let  
 1472  $C_1, \dots, C_l$  be the  $\mathcal{N}$ -heavy clusters from Definition H.11. For

$$S^* = \left\{ j \in [k] \mid f_j \in C_1 \cup \dots \cup C_l \right\},$$

1473 we have  $x_{S^*}(t) = \sum_{j \in S^*} v_j e^{2\pi i f_j t}$  approximating  $x^*$  within distance

$$\|x_{S^*} - x^*\|_T^2 \leq (1 - l/k)(1 + \varepsilon)\mathcal{N}^2.$$

1474 *Proof.* Let  $H$  be the filter function defined as in Definition H.6.

1475 Let

$$x_{\overline{S^*}}(t) := \sum_{j \in [k] \setminus S^*} v_j e^{2\pi i f_j t}.$$

1476 Notice that  $\|x^* - x_{S^*}\|_T^2 = \|x_{\overline{S^*}}\|_T^2$ .

1477 By Property VI in Lemma H.7 with setting  $\varepsilon = \varepsilon_0 := \varepsilon/2$ , we have

$$\begin{aligned} (1 - \varepsilon_0) \cdot T \|x_{\overline{S^*}}\|_T^2 &= (1 - \varepsilon_0) \int_0^T |x_{\overline{S^*}}(t)|^2 dt \\ &= (1 - \varepsilon_0) \int_0^T |x_{\overline{S^*}}(t) \cdot \text{rect}_T(t)|^2 dt \\ &\leq \int_{-\infty}^{+\infty} |x_{\overline{S^*}}(t) \cdot H(t) \cdot \text{rect}_T(t)|^2 dt, \\ &\leq \int_{-\infty}^{+\infty} |x_{\overline{S^*}}(t) \cdot H(t)|^2 dt, \end{aligned}$$

1478 where the first step follows from the definition of the norm, the second step follows from the definition  
1479 of  $\text{rect}_T(t) = 1, \forall t \in [0, T]$ , the third step follows from Lemma H.7, the forth step follows from  
1480  $\text{rect}_T(t) \leq 1$ .

1481 From Definition H.11, we have

$$\begin{aligned} \int_{-\infty}^{+\infty} |x_{\overline{S^*}}(t) \cdot H(t)|^2 dt &= \int_{-\infty}^{+\infty} |\widehat{x_{\overline{S^*}} \cdot H}(f)|^2 df \\ &= \int_{[-\infty, +\infty] \setminus C_1 \cup \dots \cup C_l} |\widehat{x^* \cdot H}(f)|^2 df \\ &\leq (k - l) \cdot T \mathcal{N}^2 / k. \end{aligned}$$

1482 where the first step follows from Parseval's theorem, the second step follows from Definition  
1483 H.11, Property IV of Lemma H.7, the definition of  $S^*$ , thus,  $\text{supp}(\widehat{x_{S^*} \cdot H}(f)) = C_1 \cup \dots \cup C_l$ ,  
1484  $\text{supp}(\widehat{x_{S^*} \cdot H}(f)) \cap \text{supp}(\widehat{x_{\overline{S^*}} \cdot H}(f)) = \emptyset$ , the last step follows from Definition H.11.

1485 Overall, we have  $(1 - \varepsilon_0) \|x_{\overline{S^*}}\|_T^2 \leq \mathcal{N}^2$ . Thus,  $\|x_{S^*}(t) - x^*(t)\|_T^2 \leq (1 - l/k)((1 + \varepsilon)\mathcal{N}^2)$  by the  
1486 basic algebra fact:  $\frac{1}{1 - \varepsilon/2} \leq 1 + \varepsilon$  for any  $\varepsilon \in [0, 1]$ .  $\square$

1487 Due to the noisy observations, not all frequencies in heavy-clusters are recoverable. Thus, we define  
1488 the recoverable frequency as follows:

1489 **Definition H.13** (Recoverable frequency). *Let  $C$  be an  $\mathcal{N}_1$ -heavy cluster. We say  $C$  is  $\mathcal{N}_2$ -recoverable*  
1490 *if it satisfies:*

$$\int_C |\widehat{H \cdot x}(f)|^2 \geq T \mathcal{N}_2^2 / k.$$

1491 A frequency  $f$  is  $(\mathcal{N}_1, \mathcal{N}_2)$ -recoverable if  $f$  is in an  $\mathcal{N}_1$ -heavy,  $\mathcal{N}_2$ -recoverable cluster  $C$ .

1492 The following lemma shows that most heavy clusters are also recoverable.

1493 **Lemma H.14** (Heavy-clusters are almost recoverable). *Let  $x^*(t) = \sum_{j=1}^k v_j e^{2\pi i f_j t}$  and  $x(t) =$*   
1494  *$x^*(t) + g(t)$  be our observable signal. Let  $\mathcal{N}^2 := \|g\|_T^2 + \delta \|x^*\|_T^2$ . Let  $C_1, \dots, C_l$  are the  $2\mathcal{N}$ -*  
1495 *heavy clusters from Definition H.11. Let  $S^*$  denotes the set of frequencies  $f^* \in \{f_j\}_{j \in [k]}$  such that,*  
1496  *$f^* \in C_i$  for some  $i \in [l]$ . Let  $S \subset S^*$  be the set of  $(2\mathcal{N}, \mathcal{N})$ -recoverable frequencies.*

1497 *Then we have that,*

$$\|x_S - x^*\|_T \leq (3 - l/k + \varepsilon)\mathcal{N}.$$

1498 *Proof.* If a cluster  $C_i$  is  $2\mathcal{N}$ -heavy but not  $\mathcal{N}$ -recoverable, then it holds that:

$$\int_{C_i} |\widehat{H \cdot x^*}(f)|^2 df \geq 4T\mathcal{N}^2/k \geq 4 \int_{C_i} |\widehat{H \cdot x}(f)|^2 df \quad (21)$$

1499 where the first step follows from  $C_i \subset \bigcup_{f_j \in S^*} C_j$ , the second step follows from  $C_i \not\subset \bigcup_{f_j \in S} C_j$ .

1500 So,

$$\begin{aligned} \int_{C_i} |\widehat{H \cdot g}(f)|^2 df &= \int_{C_i} |\widehat{H \cdot (x - x^*)}(f)|^2 df \\ &\geq \left( \sqrt{\int_{C_i} |\widehat{H \cdot x^*}(f)|^2 df} - \sqrt{\int_{C_i} |\widehat{H \cdot x}(f)|^2 df} \right)^2 \\ &\geq \frac{1}{4} \int_{C_i} |\widehat{H \cdot x^*}(f)|^2 df \end{aligned} \quad (22)$$

1501 where the first step follows from  $g(t) = x(t) - x^*(t)$ , and the second step follows from triangle  
1502 inequality, the last step follows from Eq. (21).

1503 Let  $C' := \bigcup_{f_j \in S^* \setminus S} C_j$ , i.e., the union of heavy but not recoverable clusters. Then, we have

$$\|\widehat{H \cdot g}\|_2^2 \geq \sum_{C_i \in C'} \int_{C_i} |\widehat{H \cdot g}(f)|^2 df \geq \frac{1}{4} \sum_{C_i \in C'} \int_{C_i} |\widehat{H \cdot x^*}(f)|^2 df \quad (23)$$

1504 where the first step follows from the definition of the norm and  $C_i \cap C_j = \emptyset, \forall i \neq j$ , the second step  
1505 follows from Eq. (22).

1506 Then we have that

$$\begin{aligned} T\|x_{S^* \setminus S}\|_T^2 &\leq \frac{T}{1 - \varepsilon/2} \|x_{S^* \setminus S} \cdot H\|_T^2 \\ &\leq (1 + \varepsilon) \sum_{C_i \in C'} \int_{C_i} |\widehat{H \cdot x^*}(f)|^2 df \\ &\leq 4(1 + \varepsilon) \|\widehat{H \cdot g}\|_2^2 \\ &= 4(1 + \varepsilon) T \|H \cdot g\|_T^2 \\ &\leq 4(1 + \varepsilon) T \|g\|_T^2 \\ &\leq 4(1 + \varepsilon) T \mathcal{N}^2. \end{aligned}$$

1507 where the first step follows from Property VI of  $H$  in Lemma H.7 (taking  $\varepsilon$  there to be  $\varepsilon/2$ ), the  
1508 second step follows from  $\varepsilon \in [0, 1]$  and the definition of  $C_i$ , the third step follows from Eq. (23), the  
1509 forth step follows from  $g(t) = 0, \forall t \notin [0, T]$ , the fifth step follows from Remark H.8, the last step  
1510 follows from the definition of  $\mathcal{N}^2$ . Thus, we get that:

$$\|x_{S^* \setminus S}\|_T \leq (2 - l/k + \varepsilon)\mathcal{N}, \quad (24)$$

1511 which follows from  $\sqrt{1 + \varepsilon} \leq 1 + \varepsilon/2$ .

1512 Finally, we can conclude that

$$\begin{aligned} \|x_S - x^*\|_T &\leq \|x_S - x_{S^*}\|_T + \|x_{S^*} - x^*\|_T \\ &= \|x_{S^* \setminus S}\|_T + \|x_{S^*} - x^*\|_T \\ &\leq \|x_{S^* \setminus S}\|_T + (1 + \varepsilon)\mathcal{N} \\ &\leq (3 - l/k + 2\varepsilon)\mathcal{N}, \end{aligned}$$

1513 where the first step follows from triangle inequality, the second step follows from the definition of  
1514  $x_{S^* \setminus S}$ , the third step follows from Claim H.12, the last step follows from Eq. (24). The lemma  
1515 follows by re-scaling  $\varepsilon$  to  $\varepsilon/2$ .  $\square$

1516 **H.4**  $(9 + \varepsilon)$ -approximate Fourier interpolation algorithm

1517 The goal of this section is to prove Theorem H.20, which gives a Fourier interpolation algorithm with  
 1518 approximation error  $(9 + \varepsilon)$ . It improves the constant (more than 1000) error algorithm in Chen et al.  
 1519 (2016).

**Claim H.15** (Mixed Fourier-polynomial energy bound, Chen et al. (2016)). *For any*

$$u(t) \in \text{span} \left\{ e^{2\pi i f_i t} \cdot t^j \mid j \in \{0, \dots, d\}, i \in [k] \right\},$$

1520 *we have that*

$$\max_{t \in [0, T]} |u(t)|^2 \lesssim (kd)^4 \log^3(kd) \cdot \|u\|_T^2$$

**Claim H.16** (Condition number of Mixed Fourier-polynomial). *Let  $\mathcal{F}$  is a linear function family as follows:*

$$\mathcal{F} := \text{span} \left\{ e^{2\pi i f_i t} \cdot t^j \mid j \in \{0, \dots, d\}, i \in [k] \right\},$$

1521 *Then the condition number of  $\text{Uniform}[0, T]$  with respect to  $\mathcal{F}$  is as follows:*

$$K_{\text{Uniform}[0, T]} := \sup_{t \in [0, T]} \sup_{f \in \mathcal{F}} \frac{|f(t)|^2}{\|f\|_T^2} = O((kd)^4 \log^3(kd))$$

1522 The following definition extends the well-balanced sampling procedure (Definition E.1) to high  
 1523 probability.

1524 **Definition H.17**  $((\varepsilon, \rho)$ -well-balanced sampling procedure). *Given a linear family  $\mathcal{F}$  and underlying  
 1525 distribution  $D$ , let  $P$  be a random sampling procedure that terminates in  $m$  iterations ( $m$  is not  
 1526 necessarily fixed) and provides a coefficient  $\alpha_i$  and a distribution  $D_i$  to sample  $x_i \sim D_i$  in every  
 1527 iteration  $i \in [m]$ .*

1528 *We say  $P$  is an  $\varepsilon$ -WBSP if it satisfies the following two properties:*

1. *With probability  $1 - \rho$ , for weight  $w_i = \alpha_i \cdot \frac{D(x_i)}{D_i(x_i)}$  of each  $i \in [m]$ ,*

$$\sum_{i=1}^m w_i \cdot |h(x_i)|^2 \in [1 - 10\sqrt{\varepsilon}, 1 + 10\sqrt{\varepsilon}] \cdot \|h\|_D^2 \quad \forall h \in \mathcal{F}.$$

1529 2. *The coefficients always have  $\sum_{i=1}^m \alpha_i \leq \frac{5}{4}$  and  $\alpha_i \cdot K_{\mathcal{S}, D_i} \leq \frac{\varepsilon}{2}$  for all  $i \in [m]$ .*

1530 The following lemma shows an  $(\varepsilon, \rho)$ -WBSP for mixed Fourier-polynomial family.

1531 **Lemma H.18** (WBSP for mixed Fourier-polynomial family). *Given any distribution  $D'$  with the  
 1532 same support of  $D$  and any  $\varepsilon > 0$ , the random sampling procedure with  $m = O(\varepsilon^{-1} K_{\mathcal{S}, D'} \log(d/\rho))$   
 1533 i.i.d. random samples from  $D'$  and coefficients  $\alpha_1 = \dots = \alpha_m = 1/m$  is an  $(\varepsilon, \rho)$ -WBSP.*

1534 *Proof.* By Lemma B.12 with setting  $\varepsilon = \sqrt{\varepsilon}$ , we have that, as long as  $m \geq O(\frac{1}{\varepsilon} \cdot K_{\mathcal{S}, D'} \log \frac{d}{\rho})$ , then  
 1535 with probability  $1 - \rho$ ,

$$\|A^* A - I\|_2 \leq \sqrt{\varepsilon}$$

1536 By Lemma B.11, we have that, for every  $h \in \mathcal{F}$ ,

$$\sum_{j=1}^s w_j \cdot |h(x_j)|^2 \in [1 \pm \varepsilon] \cdot \|h\|_D^2,$$

1537 where  $S$  is the  $m$  i.i.d. random samples from  $D'$ ,  $w_i = \alpha_i D(x_i)/D'(x_i)$ .

1538 Moreover,  $\sum_{i=1}^m \alpha_i = 1 \leq 5/4$  and

$$\alpha_i \cdot K_{\mathcal{S}, D'} = \frac{K_{\mathcal{S}, D'}}{m} \leq \frac{\varepsilon}{\log(d/\rho)} \leq \varepsilon,$$

1539 where the first step follows from the definition of  $\alpha_i$ , the second step follows from the definition of  
 1540  $m$ , the third step follows from  $\log(d/\rho) > 1$ .  $\square$

1541 Now, we can solve the Signal Estimation problem for mixed Fourier-polynomial signals.

1542 **Lemma H.19** (Mixed Fourier-polynomial signal estimation). *Given  $d$ -degree polynomials  $P_j(t)$ ,  $j \in$   
1543  $[k]$  and frequencies  $f_j$ ,  $j \in [k]$ . Let  $x_S(t) = \sum_{j=1}^k P_j(t) \exp(2\pi i f_j t)$ , and let  $g(t)$  denote the noise.  
1544 Given observations of the form  $x(t) := x_S(t) + g'(t)$  for arbitrary noise  $g'$  in time duration  $t \in [0, T]$ .  
1545 Then, there is an algorithm such that*

- 1546 • takes  $O(\varepsilon^{-1} \text{poly}(kd) \log(1/\rho))$  samples from  $x(t)$ ,
- 1547 • runs  $O(\varepsilon^{-1} \text{poly}(kd) \log(1/\rho))$  time,
- 1548 • outputs  $y(t) = \sum_{j=1}^k P'_j(t) \exp(2\pi i f_j t)$  with  $d$ -degree polynomial  $P'_j(t)$ , such that with  
1549 probability at least  $1 - \rho$ , we have

$$\|y - x_S\|_T^2 \leq (1 + \varepsilon) \|g'\|_T^2.$$

1550 *Proof sketch.* The proof is almost the same as Theorem G.4 where we follow the four-step Fourier  
1551 set-query framework. Claim H.15 gives the energy bound for the family of mixed Fourier-polynomial  
1552 signals, which implies that uniformly sampling  $m = \widetilde{O}(\varepsilon^{-1} |L|^4 d^4)$  points in  $[0, T]$  forms an oblivious  
1553 sketch for  $x^*$ . Moreover, by Lemma H.18, we know that it is also an  $(\varepsilon, \rho)$ -WBSP, which gives the  
1554 error guarantee. Then, we can obtain a mixed Fourier-polynomial signal  $y(t)$  by solving a weighted  
1555 linear regression.  $\square$

1556 Now, we are ready to prove the main result of this section, a  $(9 + \varepsilon)$ -approximate Fourier interpolation  
1557 algorithm.

1558 **Theorem H.20** (Fourier interpolation with  $(9 + \varepsilon)$ -approximation error). *Let  $x(t) = x^*(t) + g(t)$ ,  
1559 where  $x^*$  is  $k$ -Fourier-sparse signal with frequencies in  $[-F, F]$ . Given samples of  $x$  over  $[0, T]$  we  
1560 can output  $y(t)$  such that with probability at least  $1 - 2^{-\Omega(k)}$ ,*

$$\|y - x^*\|_T \leq (9 + \varepsilon) \|g\|_T + \delta \|x^*\|_T.$$

1561 *Our algorithm uses  $\text{poly}(k, \varepsilon^{-1}, \log(1/\delta)) \log(FT)$  samples and  $\text{poly}(k, \varepsilon^{-1}, \log(1/\delta)) \cdot \log^2(FT)$   
1562 time. The output  $y$  is  $\text{poly}(k, \log(1/\delta)) \varepsilon^{-1.5}$ -Fourier-sparse signal.*

1563 *Proof.* Let  $\mathcal{N}^2 := \|g(t)\|_T^2 + \delta \|x^*(t)\|_T^2$  be the heavy cluster parameter.

1564 First, by Lemma H.14, there is a set of frequencies  $S \subset [k]$  and  $x_S(t) = \sum_{j \in S} v_j e^{2\pi i f_j t}$  such that

$$\|x_S - x^*\|_T \leq (3 + O(\varepsilon)) \mathcal{N}. \quad (25)$$

1565 Furthermore, each  $f_j$  with  $j \in S$  belongs to an  $\mathcal{N}$ -heavy cluster  $C_j$  with respect to the filter function  
1566  $H$  defined in Definition H.6.

1567 By Definition H.11 of heavy cluster, it holds that

$$\int_{C_j} |\widehat{H \cdot x^*}(f)|^2 df \geq T \mathcal{N}^2 / k.$$

1568 By Definition H.11, we also have  $|C_j| \leq k \cdot \Delta_h$ , where  $\Delta_h$  is the bandwidth of  $\widehat{H}$ .

1569 Let  $\Delta \in \mathbb{R}_+$ , and  $\Delta > k \cdot \Delta_h$ , which implies that  $C_j \subseteq [f_j - \Delta, f_j + \Delta]$ . Thus, we have

$$\int_{f_j - \Delta}^{f_j + \Delta} |\widehat{H \cdot x^*}(f)|^2 df \geq T \mathcal{N}^2 / k.$$

1570 Now it is enough to recover only  $x_S$ , instead of  $x^*$ .

1571 By applying Theorem H.36, there is an algorithm that outputs a set of frequencies  $L \subset \mathbb{R}$  such that,  
1572  $|L| = O(k)$ , and with probability at least  $1 - 2^{-\Omega(k)}$ , for any  $f_j$  with  $j \in S_f$ , there is a  $\tilde{f} \in L$  such  
1573 that,

$$|f_j - \tilde{f}| \lesssim \Delta \sqrt{\Delta T}.$$

1574 We define a map  $p : \mathbb{R} \rightarrow L$  as follows:

$$p(f) := \arg \min_{\tilde{f} \in L} |f - \tilde{f}| \quad \forall f \in \mathbb{R}.$$

1575 Then,  $x_S(t)$  can be expressed as

$$\begin{aligned} x_{S_f}(t) &= \sum_{j \in S_f} v_j e^{2\pi i f_j t} \\ &= \sum_{j \in S_f} v_j e^{2\pi i p(f_j) t} \cdot e^{2\pi i (f_j - p(f_j)) t} \\ &= \sum_{\tilde{f} \in L} e^{2\pi i \tilde{f} t} \cdot \sum_{j \in S_f: p(f_j) = \tilde{f}} v_j e^{2\pi i (f_j - \tilde{f}) t}, \end{aligned}$$

1576 where the first step follows from the definition of  $x_S$ , the last step follows from interchanging the  
1577 summations.

1578 For each  $\tilde{f}_i \in L$ , by Corollary H.2 with  $x^* = x_{S_f}$ ,  $\Delta = \Delta \sqrt{\Delta T}$ , we have that there exist degree  
1579  $d = O(T\Delta\sqrt{\Delta T} + k^3 \log k + k \log 1/\delta)$  polynomials  $P_i(t)$  corresponding to  $\tilde{f}_i \in L$  such that,

$$\|x_{S_f}(t) - \sum_{\tilde{f}_i \in L} e^{2\pi i \tilde{f}_i t} P_i(t)\|_T \leq \delta \|x_{S_f}(t)\|_T \quad (26)$$

1580 Define the following function family:

$$\mathcal{F} := \text{span} \left\{ e^{2\pi i \tilde{f} t} \cdot t^j \mid \forall \tilde{f} \in L, j \in \{0, 1, \dots, d\} \right\}.$$

1581 Note that  $\sum_{\tilde{f}_i \in L} e^{2\pi i \tilde{f}_i t} P_i(t) \in \mathcal{F}$ .

1582 By Claim H.16, for function family  $\mathcal{F}$ ,  $K_{\text{Uniform}[0, T]} = O((|L|d)^4 \log^3(|L|d))$ .

1583 By Lemma H.18, we have that, choosing a set  $W$  of  $O(\varepsilon^{-1} K_{\text{Uniform}[0, T]} \log(|L|d/\rho))$  i.i.d. samples  
1584 uniformly at random over duration  $[0, T]$  is a  $(\varepsilon, \rho)$ -WBSP.

1585 By Lemma H.19, there is an algorithm that runs in  $O(\varepsilon^{-1} |W| (|L|d)^{\omega-1} \log(1/\rho))$ -time using sam-  
1586 ples in  $W$ , and outputs  $y'(t) \in \mathcal{F}$  such that, with probability  $1 - \rho$ ,

$$\|y'(t) - \sum_{\tilde{f}_i \in L} e^{2\pi i \tilde{f}_i t} P_i(t)\|_T \leq (1 + \varepsilon) \|x(t) - \sum_{\tilde{f}_i \in L} e^{2\pi i \tilde{f}_i t} P_i(t)\|_T \quad (27)$$

1587 Then by Lemma H.3, we have that there is a  $O(kd)$ -Fourier-sparse signal  $y(t)$ , such that

$$\|y(t) - y'(t)\|_T \leq \delta' \quad (28)$$

1588 where  $\delta' > 0$  is any positive real number, thus,  $y$  can be arbitrarily close to  $y'$ .

1589 Moreover, the sparsity of  $y(t)$  is  $kd = kO(T\Delta\sqrt{\Delta T} + k^3 \log k + k \log 1/\delta) =$   
1590  $\varepsilon^{-1.5} \text{poly}(k, \log(1/\delta))$ .

1591 Therefore, the total approximation error can be upper bounded as follows:

$$\begin{aligned} &\|y - x^*\|_T \\ &\leq \|y - y'\|_T + \left\| y' - \sum_{\tilde{f}_i \in L} e^{2\pi i \tilde{f}_i t} P_i(t) \right\|_T + \left\| \sum_{\tilde{f}_i \in L} e^{2\pi i \tilde{f}_i t} P_i(t) - x^* \right\|_T \quad (\text{Triangle inequality}) \\ &\leq (1 + o(1)) \left\| y - \sum_{\tilde{f}_i \in L} e^{2\pi i \tilde{f}_i t} P_i(t) \right\|_T + \left\| \sum_{\tilde{f}_i \in L} e^{2\pi i \tilde{f}_i t} P_i(t) - x^* \right\|_T \quad (\text{Eq. (28)}) \\ &\leq (1 + \varepsilon) \left\| x - \sum_{\tilde{f}_i \in L} e^{2\pi i \tilde{f}_i t} P_i(t) \right\|_T + \left\| \sum_{\tilde{f}_i \in L} e^{2\pi i \tilde{f}_i t} P_i(t) - x^* \right\|_T \quad (\text{Eq. (27)}) \end{aligned}$$

$$\begin{aligned}
&\leq (1+2\varepsilon)\|g\|_T + (2+\varepsilon)\left\|\sum_{\tilde{f}_i \in L} e^{2\pi i \tilde{f}_i t} P_i(t) - x^*\right\|_T && \text{(Triangle inequality)} \\
&\leq (1+2\varepsilon)\|g\|_T + (2+\varepsilon)\left\|\sum_{\tilde{f}_i \in L} e^{2\pi i \tilde{f}_i t} P_i(t) - x_{S_f}\right\|_T + (2+\varepsilon)\|x_{S_f} - x^*\|_T \\
&&& \text{(Triangle inequality)} \\
&\leq (1+2\varepsilon)\|g\|_T + (2+\varepsilon)\delta\|x_{S_f}\|_T + (2+\varepsilon)\|x_{S_f} - x^*\|_T && \text{(Eq. (26))} \\
&\leq (1+2\varepsilon)\|g\|_T + O(\delta)\|x^*\|_T + (2+\varepsilon)(1+\delta)\|x_{S_f} - x^*\|_T && \text{(Triangle inequality)} \\
&\leq (1+2\varepsilon)\|g\|_T + O(\delta)\|x^*\|_T + (2+\varepsilon)(1+\delta)(\|x_{S_f} - x_S\|_T + \|x_S - x^*\|_T) \\
&&& \text{(Triangle inequality)} \\
&\leq (1+2\varepsilon)\|g\|_T + O(\delta)\|x^*\|_T + (2+\varepsilon+O(\delta))(4+O(\varepsilon))\mathcal{N} && \text{(Eq. (25) and Lemma H.41)} \\
&= (1+2\varepsilon)\|g\|_T + O(\delta)\|x^*\|_T + (8+O(\varepsilon+\delta))\mathcal{N},
\end{aligned}$$

Since we take

$$\mathcal{N} = \sqrt{\|g\|_T^2 + \delta\|x^*\|_T^2} \leq \|g\|_T + \sqrt{\delta}\|x^*\|_T,$$

we have

$$\|y - x^*\|_T \leq (9 + O(\varepsilon))\|g\|_T + O(\sqrt{\delta})\|x^*\|_T.$$

By re-scaling  $\varepsilon$  and  $\delta$ , we prove the theorem.

□

## H.5 Sharper error control by signal-noise cancellation effect

In this section, we significantly improve the error analysis in Section H.3. Our key observation is the *signal-noise cancellation effect*: if there is a frequency  $f^*$  in a  $\mathcal{N}_1$ -heavy cluster but not  $(\mathcal{N}_1, \mathcal{N}_2)$ -recoverable for some  $\mathcal{N}_2 < \mathcal{N}_1$ , then it indicates that the contribution of  $f^*$  to the signal  $x^*$ 's energy are cancelled out by the noise  $g$ .

In the following lemma, we improving Lemma H.14 by considering  $g$ 's effect in the gap between heavy-cluster signal and recoverable signal.

**Lemma H.21** (Sharper error bound for recoverable signal, an improved version of Lemma H.14). *Let  $x^*(t) = \sum_{j=1}^k v_j e^{2\pi i f_j t}$  and  $x(t) = x^*(t) + g(t)$  be our observable signal. Let  $\mathcal{N}_1^2 := \|g(t)\|_T^2 + \delta\|x^*(t)\|_T^2$ . Let  $C_1, \dots, C_l$  are the  $\mathcal{N}_1$ -heavy clusters from Definition H.11. Let  $S^*$  denotes the set of frequencies  $f^* \in \{f_j\}_{j \in [k]}$  such that,  $f^* \in C_i$  for some  $i \in [l]$ . Let  $S \subset S^*$  be the set of  $(\mathcal{N}_1, \sqrt{\varepsilon_2}\mathcal{N}_1)$ -recoverable frequencies (Definition H.13).*

Then we have that,

$$\|H \cdot x_{S^*} - H \cdot x_S\|_T^2 + \|H \cdot x - H \cdot x_S\|_T^2 \leq (1 + O(\sqrt{\varepsilon_2}))\|x - x_{S^*}\|_T^2.$$

*Proof.* Let  $g'(t) := g(t) + x^*(t) - x_{S^*}(t) = x(t) - x_{S^*}(t)$ .

In order for cluster  $C_i$  to be missed, we must have that

$$\int_{C_i} |\widehat{H \cdot x_{S^*}}(f)|^2 df \geq T\mathcal{N}_1^2/k \geq \frac{1}{\varepsilon_2} \int_{C_i} |\widehat{H \cdot x}(f)|^2 df \quad (29)$$

where the first steps follows from  $C_i \subset \cup_{f_j \in S^*} C_j$ , the second step follows from  $C_i \not\subset \cup_{f_j \in S} C_j$ .

Thus,

$$\begin{aligned}
\int_{C_i} |\widehat{H \cdot g'}(f)|^2 df &= \int_{C_i} |H \cdot (\widehat{x - x_{S^*}})(f)|^2 df \\
&\geq \left( \sqrt{\int_{C_i} |\widehat{H \cdot x_{S^*}}(f)|^2 df} - \sqrt{\int_{C_i} |\widehat{H \cdot x}(f)|^2 df} \right)^2 \\
&\geq \left( \frac{1}{\sqrt{\varepsilon_2}} - 1 \right)^2 \int_{C_i} |\widehat{H \cdot x}(f)|^2 df
\end{aligned}$$

$$\geq \frac{1}{2\varepsilon_2} \int_{C_i} |\widehat{H \cdot x}(f)|^2 df, \quad (30)$$

1612 where the first step follows from the definition of  $g'$ , the second step follows from triangle inequality,  
1613 the third step follows from Eq. (29), the last step follows from  $\varepsilon_2 \leq 0.1$ .

1614 **Bound  $\|H \cdot x - H \cdot x_S\|_T$ .** Let  $I' = \cup_{f_j \in S^* \setminus S} C_j$ , then we have that,

$$\begin{aligned} T\|H \cdot x - H \cdot x_S\|_T^2 &\leq \int_{-\infty}^{\infty} |H \cdot x(t) - H \cdot x_S(t)|^2 dt \\ &= \int_{-\infty}^{\infty} |(\widehat{H \cdot x} - \widehat{H \cdot x_S})(f)|^2 df \\ &= \int_{I'} |(\widehat{H \cdot x} - \widehat{H \cdot x_S})(f)|^2 df + \int_{\overline{I'}} |(\widehat{H \cdot x} - \widehat{H \cdot x_S})(f)|^2 df \end{aligned} \quad (31)$$

1615 where the first step follows from the definition of the norm, the second step follows from Parseval's  
1616 theorem, the third step follows from  $I' \cup \overline{I'} = [-\infty, \infty]$ .

1617 **Bound  $\|H \cdot x_{S^*} - H \cdot x_S\|_T$**  We can upper-bound it as follows:

$$\begin{aligned} T\|H \cdot x_{S^*} - H \cdot x_S\|_T^2 &\leq \int_{-\infty}^{\infty} |H \cdot x_{S^*}(t) - H \cdot x_S(t)|^2 dt \\ &= \int_{-\infty}^{\infty} |(\widehat{H \cdot x_{S^*}} - \widehat{H \cdot x_S})(f)|^2 df \\ &= \int_{I'} |(\widehat{H \cdot x_{S^*}} - \widehat{H \cdot x_S})(f)|^2 df + \int_{\overline{I'}} |(\widehat{H \cdot x_{S^*}} - \widehat{H \cdot x_S})(f)|^2 df \\ &= \int_{I'} |(\widehat{H \cdot x_{S^*}} - \widehat{H \cdot x_S})(f)|^2 df \end{aligned} \quad (32)$$

1618 where the first step follows from the definition of the norm, the second step follows from Parseval's  
1619 theorem, the third step follows from  $I' \cup \overline{I'} = [-\infty, \infty]$ , the last step follows from  $(\cup_{f_j \in S^* \setminus S} C_j) \cap$   
1620  $\overline{I'} = \emptyset$ .

1621 **Putting it all together.** By Eqs. (31) and (32), we get that

$$\begin{aligned} &T\|H \cdot x_{S^*} - H \cdot x_S\|_T^2 + T\|H \cdot x - H \cdot x_S\|_T^2 \\ &\leq \int_{I'} |(\widehat{H \cdot x_{S^*}} - \widehat{H \cdot x_S})(f)|^2 df + \int_{I'} |(\widehat{H \cdot x} - \widehat{H \cdot x_S})(f)|^2 df + \int_{\overline{I'}} |(\widehat{H \cdot x} - \widehat{H \cdot x_S})(f)|^2 df. \end{aligned}$$

1622 For the first integral, we have

$$\begin{aligned} \sqrt{\int_{I'} |(\widehat{H \cdot x_{S^*}} - \widehat{H \cdot x_S})(f)|^2 df} &= \sqrt{\int_{I'} |\widehat{H \cdot x_{S^*}}(f)|^2 df} \\ &\leq \sqrt{\int_{I'} |\widehat{H \cdot x}(f)|^2 df} + \sqrt{\int_{I'} |\widehat{H \cdot g'}(f)|^2 df} \\ &\leq \sqrt{2\varepsilon_2 \int_{I'} |\widehat{H \cdot g'}(f)|^2 df} + \sqrt{\int_{I'} |\widehat{H \cdot g'}(f)|^2 df} \\ &\leq (1 + \sqrt{2\varepsilon_2}) \sqrt{\int_{I'} |\widehat{H \cdot g'}(f)|^2 df}, \end{aligned} \quad (33)$$

1623 where the first step follows from  $(\cup_{f_j \in S^* \setminus S} C_j) \cap I' = \emptyset$ , the second step follows from triangle inequality,  
1624 the third step follows from Eq. (30), the last step is straightforward.

1625 For the second integral, we have

$$\int_{I'} |(\widehat{H \cdot x} - \widehat{H \cdot x_S})(f)|^2 df = \int_{I'} |\widehat{H \cdot x}(f)|^2 df$$



$$\leq 2\varepsilon_2 \int_{I'} |\widehat{H \cdot g'}(f)|^2 df, \quad (34)$$

1626 where the first step follows from  $(\cup_{f_j \in S} C_j) \cap I' = \emptyset$ , the second step follows from Eq. (30).

1627 For the third integral, together with the  $\int_{I'} |\widehat{H \cdot g'}(f)|^2 df$  term in the first integral's upper bound  
1628 (Eq. (33)), we have

$$\begin{aligned} & \int_{\overline{I'}} |(\widehat{H \cdot x} - \widehat{H \cdot x_S})(f)|^2 df + \int_{I'} |\widehat{H \cdot g'}(f)|^2 df \\ &= \int_{\overline{I'}} |H \cdot (x_{S^*} + g' - x_S)(f)|^2 df + \int_{I'} |\widehat{H \cdot g'}(f)|^2 df \\ &= \int_{\overline{I'}} |\widehat{H \cdot g'}(f)|^2 df + \int_{I'} |\widehat{H \cdot g'}(f)|^2 df \\ &= \int_{-\infty}^{\infty} |\widehat{H \cdot g'}(f)|^2 df \\ &= \int_{-\infty}^{\infty} |H \cdot g'(t)|^2 dt \\ &= T \|H \cdot g'(t)\|_T^2 \\ &\leq T \|g'\|_T^2, \end{aligned} \quad (35)$$

1629 where the first step follows from the definition of  $g'$ , the second step follows from  $(\cup_{f_j \in S^*} C_j) \cap \overline{I'} =$   
1630  $(\cup_{f_j \in S} C_j)$ , the third step follows from  $I' \cup \overline{I'} = [-\infty, \infty]$ , the forth step follows from Parseval's  
1631 theorem, the fifth step follows from  $g'(t) = 0, \forall t \notin [0, T]$ , the last step follows from  $H(t) \leq 1$  by  
1632 Remark H.8.

1633 Furthermore, we have that

$$\int_{I'} |\widehat{H \cdot g'}(f)|^2 df \leq \int_{-\infty}^{\infty} |\widehat{H \cdot g'}(f)|^2 df \leq T \|g'(t)\|_T^2. \quad (36)$$

1634 Therefore, we conclude that

$$\begin{aligned} & T \|H \cdot x_{S^*} - H \cdot x_S\|_T^2 + T \|H \cdot x - H \cdot x_S\|_T^2 \\ &\leq T \|H \cdot x_{S^*} - H \cdot x_S\|_T^2 + \int_{I'} |(\widehat{H \cdot x} - \widehat{H \cdot x_S})(f)|^2 df + \int_{\overline{I'}} |(\widehat{H \cdot x} - \widehat{H \cdot x_S})(f)|^2 df \\ &\leq \int_{I'} |(\widehat{H \cdot x_{S^*}} - \widehat{H \cdot x_S})(f)|^2 df + \int_{I'} |(\widehat{H \cdot x} - \widehat{H \cdot x_S})(f)|^2 df + \int_{\overline{I'}} |(\widehat{H \cdot x} - \widehat{H \cdot x_S})(f)|^2 df \\ &\leq (1 + \sqrt{\varepsilon_2})^2 \int_{I'} |\widehat{H \cdot g'}(f)|^2 df + \int_{I'} |(\widehat{H \cdot x} - \widehat{H \cdot x_S})(f)|^2 df + \int_{\overline{I'}} |(\widehat{H \cdot x} - \widehat{H \cdot x_S})(f)|^2 df \\ &\leq (1 + \sqrt{\varepsilon_2})^2 \int_{I'} |\widehat{H \cdot g'}(f)|^2 df + 2\varepsilon_2 \int_{I'} |\widehat{H \cdot g'}(f)|^2 df + \int_{\overline{I'}} |(\widehat{H \cdot x} - \widehat{H \cdot x_S})(f)|^2 df \\ &= O(\sqrt{\varepsilon_2}) \int_{I'} |\widehat{H \cdot g'}(f)|^2 df + \int_{I'} |\widehat{H \cdot g'}(f)|^2 df + \int_{\overline{I'}} |(\widehat{H \cdot x} - \widehat{H \cdot x_S})(f)|^2 df \\ &\leq O(\sqrt{\varepsilon_2}) T \|g'\|_T^2 + \int_{I'} |\widehat{H \cdot g'}(f)|^2 df + \int_{\overline{I'}} |(\widehat{H \cdot x} - \widehat{H \cdot x_S})(f)|^2 df \\ &\leq O(\sqrt{\varepsilon_2}) T \|g'\|_T^2 + T \|g'\|_T^2 \\ &= (1 + O(\sqrt{\varepsilon_2})) T \|g'\|_T^2 \end{aligned}$$

1635 where the first step follows from Eq. (31), the second step follows from Eq. (32), the third step  
1636 follows from Eq. (33), the forth step follows from Eq. (34), the fifth step follows from  $(1 + \sqrt{2\varepsilon_2})^2 \leq$   
1637  $1 + O(\sqrt{\varepsilon_2})$ , the sixth step follows from Eq. (36), the seventh step follows from Eq. (35), the last  
1638 step is straightforward.

1639 The lemma is then proved.  $\square$

1640 As a consequence, we can easily bound  $\|x_{S^*} - x_S\|_T$  as follows.

1641 **Corollary H.22.** *Let  $S^*$  and  $S$  be defined as in Lemma H.21. Then, we have that,*

$$\|x_{S^*} - x_S\|_T^2 \leq (1 + O(\sqrt{\varepsilon_2}))\|x - x_{S^*}\|_T^2$$

1642 *Proof.* We have that,

$$\|x_{S^*} - x_S\|_T^2 \leq (1 + 2\varepsilon)\|H \cdot x_{S^*} - H \cdot x_S\|_T^2 \leq (1 + 2\varepsilon)(1 + O(\sqrt{\varepsilon_2}))\|x - x_{S^*}\|_T^2$$

1643 where the first step follows from Lemma H.7 Property VI, the second step follows from Lemma H.21  
1644 and  $\varepsilon = \varepsilon_2$ .  $\square$

1645 In Lemma H.21, we introduce an extra term  $\|H \cdot x - H \cdot x_S\|_T$ . The following lemma shows that this  
1646 term appears in the approximation error  $\|x - x_S\|_T$ , which can be used to upper-bound the Signal  
1647 Estimation's error.

1648 **Lemma H.23** (Decomposing the approximation error of recoverable signal). *Let  $x^*(t) =$   
1649  $\sum_{j=1}^k v_j e^{2\pi i f_j t}$  and  $x(t) = x^*(t) + g(t)$  be our observable signal. Let  $\mathcal{N}_1^2 := \|g(t)\|_T^2 + \delta \|x^*(t)\|_T^2$ .  
1650 Let  $C_1, \dots, C_l$  are the  $\mathcal{N}_1$ -heavy clusters from Definition H.11. Let  $S^*$  denotes the set of frequencies  
1651  $f^* \in \{f_j\}_{j \in [k]}$  such that,  $f^* \in C_i$  for some  $i \in [l]$ , and*

$$\int_{C_i} |\widehat{x^* \cdot H}(f)|^2 df \geq T \mathcal{N}_1^2 / k,$$

1652 *Let  $S$  denotes the set of frequencies  $f^* \in S^*$  such that,  $f^* \in C_j$  for some  $j \in [l]$ , and*

$$\int_{C_j} |\widehat{x \cdot H}(f)|^2 df \geq \varepsilon_2 T \mathcal{N}_1^2 / k,$$

1653 *Then we have that,*

$$\|x - x_S\|_T \leq \|H(x - x_S)\|_T + \|g\|_T + O(\varepsilon)\|x^* - x_S\|_T.$$

1654 *Proof.* We first decompose  $\|x - x_S\|_T$  into the part that passes through the filter  $H$  and the part that  
1655 does not pass through  $H$ :

$$\begin{aligned} \|x - x_S\|_T^2 &\leq \|H(x - x_S)\|_T^2 + \|(1 - H)(x - x_S)\|_T^2 \\ &\leq \|H(x - x_S)\|_T^2 + \|(1 - H)(x - x^*)\|_T^2 + \|(1 - H)(x^* - x_S)\|_T^2 \\ &\leq \|H(x - x_S)\|_T^2 + \|(1 - H)g\|_T^2 + \|(1 - H)(x^* - x_S)\|_T^2, \end{aligned}$$

1656 where the first step follows from triangle inequality, the second step follows from triangle inequality,  
1657 the last step follows from the definition of  $g$ .

1658 For the second term, we have that

$$\|(1 - H)g\|_T^2 \leq \|g\|_T^2,$$

1659 by Remark H.8.

1660 For the third term, we have that,

$$\|(1 - H)(x^* - x_S)\|_T^2 = \|x^* - x_S\|_T^2 - \|H(x^* - x_S)\|_T^2 \leq \varepsilon \|x^* - x_S\|_T^2,$$

1661 where the first step follows from  $1 - H > 0$ , the second step follows from  $x^* - x_S$  is  $k$ -Fourier-sparse,  
1662 thus combine Property VI of Lemma H.7, we have that  $\|H(x^* - x_S)\|_T^2 \geq (1 - \varepsilon)\|x^* - x_S\|_T^2$ .

1663 Combining them together, we prove the lemma.  $\square$

## 1664 H.6 Technical tools III: HASHTOBINS

1665 In this section, we provide some definitions and technical lemmas for the HASHTOBINS procedure,  
1666 which will be very helpful for frequency estimation.

1667 HASHTOBINS partitions the frequency coordinates into  $B = O(k)$  bins and collects rotated magni-  
1668 tudes in each bins. Ideally, each bins only contains a single ground-truth frequency, which allows us  
1669 to recover its magnitude.

1670 More specifically, HASHTOBINS first randomly hashes the frequency coordinates into the interval  
1671  $[0, 1]$ . After equally dividing  $[0, 1]$  into  $O(k)$  small bins, each coordinate lays in a different bin. This  
1672 step can be implemented by multiplying the signal in the frequency domain with a *period pulse*  
1673 *function*  $G_{\sigma,b}^{(j)}$ . Then, even if the signal does not have frequency gap, the HASHTOBINS procedure  
1674 can still partition it into several one-cluster signals with high probability.

1675 **Definition H.24** (Hash function, [Chen et al. \(2016\)](#)). Let  $\pi_{\sigma,b}(f) = \sigma(f+b) \pmod{1}$  and  $h_{\sigma,b}(f) =$   
1676  $\text{round}(\pi_{\sigma,b}(f) \cdot B)$  be the hash function that maps frequency  $f \in [-F, F]$  into bins  $\{0, \dots, B-1\}$ .

1677 **Claim H.25** (Collision probability, [Chen et al. \(2016\)](#)). For any  $\Delta_0 > 0$ , let  $\sigma$  be a sample uniformly  
1678 at random from  $[\frac{1}{4B\Delta_0}, \frac{1}{2B\Delta_0}]$ . Then, we have:

1679 I. If  $4\Delta_0 \leq |f^+ - f^-| < 2(B-1)\Delta_0$ , then  $\Pr[h_{\sigma,b}(f^+) = h_{\sigma,b}(f^-)] = 0$ .

1680 II. If  $2(B-1)\Delta_0 \leq |f^+ - f^-|$ , then  $\Pr[h_{\sigma,b}(f^+) = h_{\sigma,b}(f^-)] \lesssim \frac{1}{B}$ .

1681 **Definition H.26** (Filter for bins). Given  $B > 1$ ,  $\delta > 0$ ,  $\alpha > 0$ , let  $G(t) := G_{B,\delta,\alpha}(2\pi t)$  where  
1682  $G_{B,\delta,\alpha}$  is defined in Definition H.9. For any  $\sigma > 0$ ,  $b \in \mathbb{R}$  and  $j \in [B]$ . define

$$G_{\sigma,b}^{(j)}(t) := \frac{1}{\sigma} G(t/\sigma) e^{2\pi i t(j/B - \sigma b)/\sigma},$$

1683 and its Fourier transformation:

$$\widehat{G}_{\sigma,b}^{(j)}(f) = \sum_{i \in \mathbb{Z}} \widehat{G}(i + \frac{j}{B} - \sigma f - \sigma b).$$

1684 **Definition H.27**  $((\varepsilon_0, \Delta_0)$ -one-cluster signal, [Chen et al. \(2016\)](#)). We say that a signal  $z(t)$  is an  
1685  $(\varepsilon_0, \Delta_0)$ -one-cluster signal around  $f_0$  iff  $z(t)$  and  $\widehat{z}(f)$  satisfy the following two properties:

$$\text{Property I} : \int_{f_0 - \Delta_0}^{f_0 + \Delta_0} |\widehat{z}(f)|^2 df \geq (1 - \varepsilon_0) \int_{-\infty}^{+\infty} |\widehat{z}(f)|^2 df$$

$$\text{Property II} : \int_0^T |z(t)|^2 dt \geq (1 - \varepsilon_0) \int_{-\infty}^{+\infty} |z(t)|^2 dt.$$

1686 **Definition H.28** (Well-isolation, [Chen et al. \(2016\)](#)). We say that a frequency  $f^*$  is well-isolated  
1687 under the hashing  $(\sigma, b)$  if, for  $j = h_{\sigma,b}(f^*)$  and  $I_{f^*} = (-\infty, \infty) \setminus (f^* - \Delta_0, f^* + \Delta_0)$ ,

$$\int_{I_{f^*}} |(\widehat{H \cdot x} \cdot \widehat{G}_{\sigma,b}^{(j)})(f)|^2 df \lesssim \varepsilon_0 \cdot T \mathcal{N}_2^2 / k,$$

1688 where  $\mathcal{N}_2^2 := \varepsilon_1 \varepsilon_2 (\|g(t)\|_T^2 + \delta \|x^*(t)\|_T^2)$ .

**Lemma H.29** (Well-isolation implies one-cluster signal, a variation of Lemma 7.20 in [Chen et al. \(2016\)](#)). Let  $f^*$  satisfy

$$\int_{f^* - \Delta}^{f^* + \Delta} |\widehat{x^* \cdot H}(f)|^2 df \geq T \mathcal{N}_2^2 / k,$$

1689 where  $\mathcal{N}_2^2 := \varepsilon_1 \varepsilon_2 (\|g(t)\|_T^2 + \delta \|x^*(t)\|_T^2)$ . Let  $\widehat{z} = \widehat{x^* \cdot H} \cdot \widehat{G}_{\sigma,b}^{(j)}$  where  $j = h_{\sigma,b}(f^*)$ . If  $f^*$  is  
1690 well-isolated, then  $z$  and  $\widehat{z}$  satisfying Property II of one-cluster signal (Definition H.27), i.e.,

$$\int_0^T |z(t)|^2 dt \geq (1 - \varepsilon_0) \int_{-\infty}^{+\infty} |z(t)|^2 dt,$$

1691 **Lemma H.30** (Well-isolation by randomized hashing, [Chen et al. \(2016\)](#)). Given  $B = \Theta(k/(\varepsilon_0 \varepsilon_1 \varepsilon_2))$   
1692 and  $\sigma \in [\frac{1}{4B\Delta_0}, \frac{1}{2B\Delta_0}]$  chosen uniformly at random. Let  $f^*$  be any frequency. Then  $f^*$  is well-  
1693 isolated by a hashing  $(\sigma, b)$  with probability at least 0.9.

1694 *Proof.* Let  $S' = \{f_i\}_{i \in [k]} \cap \overline{I_{f^*}}$ . By Claim H.25, with probability at least  $(1 - 1/B)^k \geq 1 - k/B \geq$   
 1695  $1 - \varepsilon_0 \varepsilon_1 \varepsilon_2 \geq 0.99$ , for all the frequencies  $f \in S'$ , we have that  $h_{\sigma,b}(f^*) \neq h_{\sigma,b}(f)$ .

1696 Hence,

$$\begin{aligned}
 \int_{\overline{I_{f^*}}} |\widehat{x^* \cdot H} \cdot \widehat{G_{\sigma,b}^{(j)}}(f)|^2 df &\lesssim \frac{\delta^2}{k^2} \int_{\overline{I_{f^*}}} |\widehat{x^* \cdot H}(f)|^2 df \\
 &\leq \frac{\delta^2}{k^2} \int_{-\infty}^{\infty} |\widehat{x^* \cdot H}(f)|^2 df \\
 &= \frac{\delta^2}{k^2} \int_{-\infty}^{\infty} |x^* \cdot H(t)|^2 dt \\
 &= \frac{\delta^2}{k^2} \int_{[-\infty, \infty] \setminus [0, T]} |x^* \cdot H(t)|^2 dt + \frac{\delta^2}{k^2} \int_{[0, T]} |x^* \cdot H(t)|^2 dt \\
 &\leq \frac{\delta^2}{k^2} \int_{[-\infty, \infty] \setminus [0, T]} |x^* \cdot H(t)|^2 dt + \frac{\delta^2}{k^2} T \|x^*\|_T^2 \\
 &\leq \frac{\delta^2(1 + \delta)}{k^2} T \|x^*\|_T^2
 \end{aligned} \tag{37}$$

1697 where the first step follows by the Property III in the Lemma H.10 that  $|\widehat{G}(f)| \leq \delta/k$ , which implies  
 1698 that  $|\widehat{G_{\sigma,b}^{(j)}}(f)| \leq O(\delta/k)$  for  $f \in S'$ , the second step follows from  $\overline{I_{f^*}} \subset [-\infty, \infty]$ , the third step  
 1699 follows from Parseval's theorem, the forth step is straight forward, the fifth step follows from the  
 1700 property VI of Lemma H.7, the sixth step follows from V of Lemma H.7.

1701 Moreover, let  $I'$  denote the set of frequencies that hash into the same bin as  $f^*$ , then we have that,

$$\begin{aligned}
 \int_{\overline{I_{f^*}}} |\widehat{g \cdot H} \cdot \widehat{G_{\sigma,b}^{(j)}}(f)|^2 df &\leq \int_{I'} |\widehat{g \cdot H} \cdot \widehat{G_{\sigma,b}^{(j)}}(f)|^2 df + \int_{\overline{I'}} |\widehat{g \cdot H} \cdot \widehat{G_{\sigma,b}^{(j)}}(f)|^2 df \\
 &\lesssim \int_{I'} |\widehat{g \cdot H}(f)|^2 df + \int_{\overline{I'}} |\widehat{g \cdot H} \cdot \widehat{G_{\sigma,b}^{(j)}}(f)|^2 df \\
 &\lesssim \int_{I'} |\widehat{g \cdot H}(f)|^2 df + \frac{\delta^2}{k^2} \int_{\overline{I'}} |\widehat{g \cdot H}(f)|^2 df \\
 &\leq \int_{I'} |\widehat{g \cdot H}(f)|^2 df + \frac{\delta^2 T}{k^2} \|g\|_T^2
 \end{aligned} \tag{38}$$

where the first step follows from  $I' \cup \overline{I'} = [-\infty, \infty]$ , the second step follows from for any  $f \in \mathbb{R}$ ,  
 $\widehat{G_{\sigma,b}^{(j)}}(f) \lesssim 1$ , the third step follows from for any  $f \in \overline{I'}$ ,  $\widehat{G_{\sigma,b}^{(j)}}(f) \lesssim \delta/k$ , the last step follows from

$$\int_{\overline{I'}} |\widehat{g \cdot H}(f)|^2 df \leq \int_{-\infty}^{\infty} |\widehat{g \cdot H}(f)|^2 df = \int_{-\infty}^{\infty} |g \cdot H(t)|^2 dt = T \|g \cdot H\|_T^2 \leq T \|g\|_T^2.$$

1702 where the first step follows from  $\overline{I'} \in [-\infty, \infty]$ , the second step follows from Parseval's theorem,  
 1703 the third step follows from  $g(t) = 0, \forall t \notin [0, T]$ , the last step follows from Remark H.8.

1704 Next, we consider

$$\begin{aligned}
 \mathbb{E}_{\sigma,b} \left[ \int_{I'} |\widehat{g \cdot H}(f)|^2 df \right] &\approx \frac{1}{B} \int_{-\infty}^{\infty} |\widehat{g \cdot H}(f)|^2 df \\
 &\lesssim \frac{\varepsilon_0 \varepsilon_1 \varepsilon_2}{k} T \|g\|_T^2
 \end{aligned}$$

1705 where the first step follows from  $\sigma, b$  are chosen randomly, the second step follows from  
 1706  $\int_{-\infty}^{\infty} |\widehat{g \cdot H}(f)|^2 df \leq T \|g\|_T^2$ .

1707 Thus, by Markov inequality, with probability at least 0.99,

$$\int_{I'} |\widehat{g \cdot H}(f)|^2 df \lesssim \frac{\varepsilon_0 \varepsilon_1 \varepsilon_2}{k} T \|g\|_T^2. \tag{39}$$

1708 Finally, we can conclude that

$$\begin{aligned}
\int_{I_{f^*}} |(\widehat{H \cdot x} \cdot \widehat{G}_{\sigma,b}^{(j)})(f)|^2 df &= \int_{I_{f^*}} |(H \cdot (x^* + g) \cdot \widehat{G}_{\sigma,b}^{(j)})(f)|^2 df \\
&\leq 2 \int_{I_{f^*}} |\widehat{x^* \cdot H} \cdot \widehat{G}_{\sigma,b}^{(j)}(f)|^2 df + 2 \int_{I_{f^*}} |\widehat{g \cdot H} \cdot \widehat{G}_{\sigma,b}^{(j)}(f)|^2 df \\
&\lesssim \frac{\delta^2(1+\delta)}{k^2} T \|x^*\|_T^2 + 2 \int_{I_{f^*}} |\widehat{g \cdot H} \cdot \widehat{G}_{\sigma,b}^{(j)}(f)|^2 df \\
&\lesssim \frac{\delta^2(1+\delta)}{k^2} T \|x^*\|_T^2 + \frac{\delta^2 T}{k^2} \|g\|_T^2 + \int_{I'} |\widehat{g \cdot H}(f)|^2 df \\
&\lesssim \frac{\delta^2(1+\delta)}{k^2} T \|x^*\|_T^2 + \frac{\delta^2 T}{k^2} \|g\|_T^2 + \frac{\varepsilon_0 \varepsilon_1 \varepsilon_2}{k} T \|g\|_T^2 \\
&= \frac{\delta(1+\delta)}{\varepsilon_0 \varepsilon_1 \varepsilon_2 k} \varepsilon_0 \varepsilon_1 \varepsilon_2 T \delta \|x^*\|_T^2 / k + (\frac{\delta^2}{\varepsilon_0 \varepsilon_1 \varepsilon_2 k} + 1) \varepsilon_0 \varepsilon_1 \varepsilon_2 T \|g\|_T^2 / k \\
&\leq \varepsilon_0 \varepsilon_1 \varepsilon_2 T \delta \|x^*\|_T^2 / k + 2 \varepsilon_0 \varepsilon_1 \varepsilon_2 T \|g\|_T^2 / k \\
&\lesssim \varepsilon_0 \cdot T \mathcal{N}_2^2 / k,
\end{aligned}$$

1709 where the first step follows from the definition of  $g$ , the second step follows from  $(a+b)^2 \leq 2a^2 + 2b^2$ ,  
1710 the third step follows from Eq. (37), the forth step follows from Eq. (38), the fifth step follows  
1711 from Eq. (39), the sixth step is straightforward, the seventh step follows from  $\frac{\delta(1+\delta)}{\varepsilon_0 \varepsilon_1 \varepsilon_2 k} \leq 1$  and  
1712  $(\frac{\delta^2}{\varepsilon_0 \varepsilon_1 \varepsilon_2 k} + 1) \leq 2$ , the last step follows from the definition of  $\mathcal{N}_2^2$ .

1713 □

1714 **Lemma H.31** ((Chen et al., 2016, Lemma 7.21)). *Given any noise  $g(t) : [0, T] \rightarrow \mathbb{C}$  and  $g(t) =$*   
1715  *$0, \forall t \notin [0, T]$ . We have,  $\forall j \in [B]$ ,*

$$\mathbb{E}_{\sigma,b} \left[ \int_{-\infty}^{+\infty} |g(t)H(t) * G_{\sigma,b}^{(j)}(t)|^2 dt \right] \lesssim \frac{1}{B} \int_{-\infty}^{+\infty} |g(t)H(t)|^2 dt$$

## 1716 H.7 High signal-to-noise ratio (SNR) band approximation

1717 In the this section, we will give the upper bound of  $\|x_{S_f}(t) - x_S(t)\|_T$ .

1718 **Definition H.32** (High SNR and Recoverable Set). *For  $j \in [B]$ , let  $z_j^*(t) := (x^* \cdot H) \cdot G_{\sigma,b}^{(j)}$ , we*  
1719 *define the set as follows*

$$S_{g_1} := \left\{ j \in [B] \mid \|g_j(t)\|_T^2 \leq (1 - c\varepsilon) \cdot \|z_j^*(t)\|_T^2 \right\}$$

1720 where  $c$  is constant. And we also give the definition of recoverable set which is the same with  $s$  above

$$S_{g_2} := \left\{ j \in [B] \mid \exists f_0, h_{\sigma,b}(f_0) = j \text{ and } \int_{f^* - \Delta}^{f^* + \Delta} |\widehat{x \cdot H}(f)|^2 df \geq T \mathcal{N}_2^2 / k \right\}$$

1721 where  $\mathcal{N}_2^2 := \varepsilon_1 \varepsilon_2 (\|g(t)\|_T^2 + \delta \|x^*(t)\|_T^2)$ .

1722 And then we define a High SNR and recoverable set as follows

$$S_g := S_{g_1} \cap S_{g_2}$$

1723 Let  $S_f := \{j \in [k] \mid h_{\sigma,b}(f_g) \in S_g\} \cap S$ . We have  $x_{S_f}(t) := \sum_{j \in S_f} v_j e^{2\pi i f_j t}$

1724 **Remark H.33.** *In the left part of the paper, we focus on the frequency in set  $S_f$  which is a subset of*  
1725 *the recoverable frequency set  $S$ .*

1726 The following lemma shows that for any recoverable frequency (i.e., those satisfy Eq. (40)), HASH-  
1727 TOBINS will output a one-cluster signal around it with high probability. Now we will consider a  $f^*$   
1728 satisfy the assumption introduced in Definition H.32.

1729 **Lemma H.34** (HASHTOBINS for recoverable and HSR frequency). *Let  $f^* \in [-F, F]$  satisfy:*

$$\int_{f^*-\Delta}^{f^*+\Delta} |\widehat{x \cdot H}(f)|^2 df \geq T\mathcal{N}_2^2/k, \quad (40)$$

1730 *where  $\mathcal{N}_2^2 := \varepsilon_1 \varepsilon_2 (\|g(t)\|_T^2 + \delta \|x^*(t)\|_T^2)$ .*

1731 *For a random hashing  $(\sigma, b)$ , let  $j = h_{\sigma,b}(f^*)$  be the bucket that  $f^*$  maps to under the hash such that*  
 1732  *$z = (x \cdot H) * G_{\sigma,b}^{(j)}$  and  $\widehat{z} = \widehat{x \cdot H} \cdot \widehat{G}_{\sigma,b}^{(j)}$ . Given that  $S_f$  and  $c$  is defined in Definition H.32,  $j \in S_f$ .*  
 1733 *With probability at least 0.9,  $z(t)$  is an  $(\varepsilon_0, \Delta_0)$ -one-cluster (See Definition H.27) signal around  $f^*$ .*

1734 *Proof.* The proof consists of two parts. In part 1, we prove that  $z(t)$  satisfies Property I of the  
 1735 one-cluster signal around  $f^*$  (Definition H.27). In part 2, we prove that  $z(t)$  satisfies Property II of  
 1736 Definition H.27.

1737 **Part 1.** Let region  $I_{f^*} = (f^* - \Delta, f^* + \Delta)$  with complement  $\overline{I_{f^*}} = (-\infty, \infty) \setminus I_{f^*}$ .

1738 Next, with probability at least 0.99, we have that

$$\int_{I_{f^*}} |\widehat{z}(f)|^2 df \geq (1 - \delta/k) \int_{I_{f^*}} |\widehat{x \cdot H}(f)|^2 df \gtrsim T\mathcal{N}_2^2/k$$

1739 where the probability follows from  $\Delta_0 > 1000\Delta$ , the first step follows from Property I of  $G$  in  
 1740 Lemma H.10, the second step follows from Eq. (40).

1741 On the other hand,  $f^*$  is well-isolated with probability 0.9, thus by the definition of well-isolated, we  
 1742 have that

$$\int_{\overline{I_{f^*}}} |\widehat{z}(f)|^2 df \lesssim \varepsilon_0 T\mathcal{N}_2^2/k.$$

1743 Hence,  $\widehat{z}$  satisfies the Property I (in Definition H.27) of one-mountain recovery.

1744 **Part 2.** By Lemma H.29, we know that  $(x^* \cdot H) * G_{\sigma,b}^{(j)}$  always satisfies Property II (in Definition  
 1745 H.27):

$$\int_0^T |x^*(t)H(t) * G_{\sigma,b}^{(j)}(t)|^2 dt \geq (1 - \varepsilon_0) \int_{-\infty}^{+\infty} |x^*(t)H(t) * G_{\sigma,b}^{(j)}(t)|^2 dt$$

1746 As a result, by  $[-\infty, \infty] = [-\infty, 0] \cup [0, T] \cup [T, \infty]$ ,

$$\varepsilon_0 \int_{-\infty}^{+\infty} |x^*(t)H(t) * G_{\sigma,b}^{(j)}(t)|^2 dt \geq \int_{-\infty}^0 |x^*(t)H(t) * G_{\sigma,b}^{(j)}(t)|^2 dt + \int_T^{\infty} |x^*(t)H(t) * G_{\sigma,b}^{(j)}(t)|^2 dt \quad (41)$$

1747 Then, we claim that

$$\begin{aligned} \int_{-\infty}^{\infty} |x(t) \cdot H(t) * G_{\sigma,b}^{(j)}(t)|^2 dt &= \int_{-\infty}^{\infty} |\widehat{x \cdot H}(f) \cdot \widehat{G}_{\sigma,b}^{(j)}(f)|^2 df \\ &\geq \int_{f^*-\Delta}^{f^*+\Delta} |\widehat{x \cdot H}(f) \cdot \widehat{G}_{\sigma,b}^{(j)}(f)|^2 df \\ &\gtrsim \int_{f^*-\Delta}^{f^*+\Delta} |\widehat{x \cdot H}(f)|^2 df \\ &\geq T\mathcal{N}_2^2/k, \end{aligned} \quad (42)$$

1748 where the first step follows from Parseval's theorem, the second step follows from  $[f^* - \Delta, f^* + \Delta] \subset$   
 1749  $[-\infty, \infty]$ , the third step holds with probability at least 0.99 and follows from  $\Delta_0 > 1000\Delta$  and  
 1750 Property I of Lemma H.10, the last step follows from the definition of  $f^*$ .

1751 By Definition H.32, we have that

$$\int_{-\infty}^{+\infty} |g(t) \cdot H(t) * G_{\sigma,b}^{(j)}(t)|^2 dt = \int_0^T |g(t) \cdot H(t) * G_{\sigma,b}^{(j)}(t)|^2 dt \quad (43)$$

$$\begin{aligned}
&\leq c\varepsilon \int_0^T |z_j^*(t)|^2 dt \\
&\leq c\varepsilon \int_{-\infty}^{+\infty} |z_j^*(t)|^2 dt \\
&\leq \int_{-\infty}^{+\infty} c\varepsilon |x(t) \cdot H(t) * G_{\sigma,b}^{(j)}(t)|^2 dt
\end{aligned}$$

1752 where the first step from  $g(t) = 0, \forall t \notin [0, T]$ , the second step follows from Definition H.32, the  
1753 third step follows from simple algebra, the last step is due to Definition of  $z_j^*(t)$ .

1754 Then, we claim that

$$\begin{aligned}
\sqrt{\int_{-\infty}^{\infty} |x^* \cdot H * G_{\sigma,b}^{(j)}|^2 dt} &\leq \sqrt{\int_{-\infty}^{\infty} |(x^* + g) \cdot H * G_{\sigma,b}^{(j)}|^2 dt} + \sqrt{\int_{-\infty}^{\infty} |g \cdot H * G_{\sigma,b}^{(j)}|^2 dt} \\
&\lesssim \sqrt{\int_{-\infty}^{\infty} |(x^* + g) \cdot H * G_{\sigma,b}^{(j)}|^2 dt}
\end{aligned} \tag{44}$$

1755 where the first step follows from triangle inequality, the second step follows from Eq. (43).

1756 Next, we consider

$$\begin{aligned}
\sqrt{\int_T^{\infty} |(x^* + g) \cdot H * G_{\sigma,b}^{(j)}|^2 dt} &\leq \sqrt{\int_T^{\infty} |x^* \cdot H * G_{\sigma,b}^{(j)}|^2 dt} + \sqrt{\int_T^{\infty} |g \cdot H * G_{\sigma,b}^{(j)}|^2 dt} \\
&\leq \sqrt{\varepsilon_0 \int_{-\infty}^{\infty} |x^* \cdot H * G_{\sigma,b}^{(j)}|^2 dt} + \sqrt{\int_T^{\infty} |g \cdot H * G_{\sigma,b}^{(j)}|^2 dt} \\
&\leq \sqrt{\varepsilon_0 \int_{-\infty}^{\infty} |x^* \cdot H * G_{\sigma,b}^{(j)}|^2 dt} + \sqrt{\varepsilon_0 \int_{-\infty}^{\infty} |x \cdot H * G_{\sigma,b}^{(j)}|^2 dt} \\
&\lesssim \sqrt{\varepsilon_0 \int_{-\infty}^{\infty} |x \cdot H * G_{\sigma,b}^{(j)}|^2 dt},
\end{aligned} \tag{45}$$

1757 where the first step follows from triangle inequality, the second step follows from Eq. (41), the third  
1758 step follows from Eq. (43), the forth step follows from Eq. (44).

1759 Similarly,

$$\sqrt{\int_{-\infty}^0 |(x^* + g) \cdot H * G_{\sigma,b}^{(j)}|^2 dt} \lesssim \sqrt{\varepsilon_0 \int_{-\infty}^{\infty} |x \cdot H * G_{\sigma,b}^{(j)}|^2 dt} \tag{46}$$

1760 Combine equations above, we have that,

$$\begin{aligned}
&\sqrt{\int_{-\infty}^0 |(x^* + g) \cdot H * G_{\sigma,b}^{(j)}|^2 dt} + \sqrt{\int_T^{\infty} |(x^* + g) \cdot H * G_{\sigma,b}^{(j)}|^2 dt} \\
&\leq \sqrt{\int_{-\infty}^0 |(x^* + g) \cdot H * G_{\sigma,b}^{(j)}|^2 dt} + \sqrt{\int_T^{\infty} |(x^* + g) \cdot H * G_{\sigma,b}^{(j)}|^2 dt} \\
&\lesssim \sqrt{\varepsilon_0 \int_{-\infty}^{\infty} |x \cdot H * G_{\sigma,b}^{(j)}|^2 dt}
\end{aligned}$$

1761 where the first step follows from  $\sqrt{a+b} \leq \sqrt{a} + \sqrt{b}$ , the second step follows from Eq. (45) and  
1762 Eq. (46).

1763 Hence, we have that  $z = (x^* + g) \cdot H * G_{\sigma,b}^{(j)}$  satisfies Property II (in Definition H.27) with probability  
1764 0.95.

1765

□

## 1766 H.8 Ultra-high sensitivity frequency estimation

1767 In this section, we improve the high sensitivity frequency estimation in Section H.3 with even  
 1768 higher sensitivity, using the results in previous sections. More specifically, we show how to estimate  
 1769 the frequencies of the signal  $x_S$  whose frequencies are only  $\varepsilon^2\mathcal{N}$ -heavy, while in section H.3 the  
 1770 recoverable signal's frequencies are  $\mathcal{N}$ -heavy.

1771 **Lemma H.35** (Frequency estimation for one-cluster signal, Lemma 7.3 in Chen et al. (2016)).  
 1772 For a sufficiently small constant  $\varepsilon_0 > 0$ , any  $f_0 \in [-F, F]$ , and  $\Delta_0 > 0$ , given an  $(\varepsilon_0, \Delta_0)$ -  
 1773 one-cluster signal  $z(t)$  around  $f_0$ , Procedure FREQUENCYRECOVERY1CLUSTER, returns  $\tilde{f}_0$  with  
 1774  $|\tilde{f}_0 - f_0| \lesssim \Delta_0 \cdot \sqrt{\Delta_0 T}$  with probability at least  $1 - 2^{-\Omega(k)}$ .

1775 The following theorem shows the algorithm for ultra-high sensitivity frequency estimation.

1776 **Theorem H.36** (Ultra-high sensitivity frequency estimation algorithm with low success probability).  
 1777 Let  $x^*(t) = \sum_{j=1}^k v_j e^{2\pi i f_j t}$  and  $x(t) = x^*(t) + g(t)$  be our observable signal where  $\|g(t)\|_T^2 \leq$   
 1778  $c\|x^*(t)\|_T^2$  for a sufficiently small constant  $c$ . Then Procedure FREQUENCYRECOVERYKCLUSTER  
 1779 returns a set  $L$  of  $O(k/(\varepsilon_0 \varepsilon_1 \varepsilon_2))$  frequencies that cover all  $\mathcal{N}_2$ -heavy clusters and have high SNR  
 1780 (See Definition H.32) of  $x^*$ , which uses  $\text{poly}(k, \varepsilon^{-1}, \varepsilon_0^{-1}, \varepsilon_1^{-1}, \varepsilon_2^{-1}, \log(1/\delta)) \log(FT)$  samples and  
 1781  $\text{poly}(k, \varepsilon^{-1}, \varepsilon_0^{-1}, \varepsilon_1^{-1}, \varepsilon_2^{-1}, \log(1/\delta)) \log^2(FT)$  time.

1782 In particular, for  $\Delta_0 = \varepsilon^{-1} \text{poly}(k, \log(1/\delta))/T$  and  $\mathcal{N}_2^2 := \varepsilon_1 \varepsilon_2 (\|g(t)\|_T^2 + \delta \|x^*(t)\|_T^2)$ , with  
 1783 probability 0.9, for any  $f^*$  with

$$\int_{f^* - \Delta}^{f^* + \Delta} |\widehat{x \cdot H}(f)|^2 df \geq T \mathcal{N}_2^2 / k, \quad (47)$$

1784 there exists an  $\tilde{f} \in L$  satisfying

$$|f^* - \tilde{f}| \lesssim \Delta_0 \sqrt{\Delta_0 T}.$$

1785 *Proof.* By Lemma H.34 and Lemma H.35, we prove the theorem.  $\square$

1786 **Theorem H.37** (Ultra-high sensitivity frequency estimation algorithm with high success prob-  
 1787 ability). Let  $x^*(t) = \sum_{j=1}^k v_j e^{2\pi i f_j t}$  and  $x(t) = x^*(t) + g(t)$  be our observable signal  
 1788 where  $\|g(t)\|_T^2 \leq c\|x^*(t)\|_T^2$  for a sufficiently small constant  $c$ . Then Procedure FREQUEN-  
 1789 CYRECOVERYKCLUSTER returns a set  $L$  of  $O(k/(\varepsilon_0 \varepsilon_1 \varepsilon_2))$  frequencies that covers all  $\mathcal{N}_2$ -  
 1790 heavy clusters of  $x^*$ , which uses  $\text{poly}(k, \varepsilon^{-1}, \varepsilon_0^{-1}, \varepsilon_1^{-1}, \varepsilon_2^{-1}, \log(1/\delta)) \log(FT)$  samples and  
 1791  $\text{poly}(k, \varepsilon^{-1}, \varepsilon_0^{-1}, \varepsilon_1^{-1}, \varepsilon_2^{-1}, \log(1/\delta)) \log^2(FT)$  time.

1792 In particular, for  $\Delta_0 = \varepsilon^{-1} \text{poly}(k, \log(1/\delta))/T$  and  $\mathcal{N}_2^2 := \varepsilon_1 \varepsilon_2 (\|g(t)\|_T^2 + \delta \|x^*(t)\|_T^2)$ , with  
 1793 probability  $1 - 2^{-\Omega(k)}$ , for any  $f^*$  with

$$\int_{f^* - \Delta}^{f^* + \Delta} |\widehat{x \cdot H}(f)|^2 df \geq T \mathcal{N}_2^2 / k, \quad (48)$$

1794 there exists an  $\tilde{f} \in L$  satisfying

$$|f^* - \tilde{f}| \lesssim \Delta_0 \sqrt{\Delta_0 T}.$$

1795 The following lemma shows the approximation error guarantee for the recoverable signal  $x_S$  of the  
 1796 ultra-high sensitivity frequency estimation algorithm (Theorem H.37).

1797 **Lemma H.38** (Recoverable signal's approximation error guarantee). Let  $x^*(t) = \sum_{j=1}^k v_j e^{2\pi i f_j t}$   
 1798 and  $x(t) = x^*(t) + g(t)$  be our observable signal. Let  $\mathcal{N}_1^2 := \varepsilon_1 (\|g(t)\|_T^2 + \delta \|x^*(t)\|_T^2)$ . Let  
 1799  $C_1, \dots, C_l$  are the  $\mathcal{N}_1$ -heavy clusters from Definition H.11. Let  $S^*$  denotes the set of frequencies  
 1800  $f^* \in \{f_j\}_{j \in [k]}$  such that,  $f^* \in C_i$  for some  $i \in [l]$ , and

$$\int_{C_i} |\widehat{x^* \cdot H}(f)|^2 df \geq T \mathcal{N}_1^2 / k,$$



1801 Let  $S$  denotes the set of frequencies  $f^* \in S^*$  such that,  $f^* \in C_j$  for some  $j \in [l]$ , and

$$\int_{C_j} |\widehat{x \cdot H}(f)|^2 df \geq \varepsilon_2 T \mathcal{N}_1^2 / k,$$

1802 Then, we have that,

$$\|x - x_S\|_T + \|x_S - x^*\|_T \leq (1 + \sqrt{2} + O(\sqrt{\varepsilon}))\|g\|_T + O(\sqrt{\delta})\|x^*\|_T.$$

*Proof.* Following from the fact that  $\sqrt{1 + \varepsilon} = 1 + O(\varepsilon)$  for  $\varepsilon < 1$ , we have

$$\mathcal{N}_1 = \sqrt{\varepsilon_1(\|g\|_T^2 + \delta\|x^*\|_T^2)} \leq \sqrt{\varepsilon_1}\|g\|_T + \sqrt{\delta\varepsilon_1}\|x^*\|_T$$

1803 We have that

$$\begin{aligned} \|x^* - x_S\|_T &\leq \|x_{S^*} - x_S\|_T + \|x^* - x_{S^*}\|_T \\ &\leq (1 + O(\sqrt{\varepsilon_2}))\|x - x_{S^*}\|_T + \|x^* - x_{S^*}\|_T \\ &\leq (1 + O(\sqrt{\varepsilon_2}))\|x - x^*\|_T + (2 + O(\sqrt{\varepsilon_2}))\|x^* - x_{S^*}\|_T \\ &\leq (1 + O(\sqrt{\varepsilon_2}))\|g\|_T + (2 + O(\sqrt{\varepsilon_2} + \varepsilon))\mathcal{N}_1 \end{aligned} \quad (49)$$

1804 where the first step follows from triangle inequality, the second step follows from Corollary H.22, the  
1805 third step follows from triangle inequality, the forth step follows from Claim H.12.

1806 Thus, we have that

$$\begin{aligned} \|x - x_{S^*}\|_T &\leq \|x - x^*\|_T + \|x^* - x_{S^*}\|_T \\ &\leq \|g\|_T + \|x^* - x_{S^*}\|_T \\ &\leq \|g\|_T + (1 + \varepsilon)\mathcal{N}_1 \end{aligned} \quad (50)$$

1807 where the first step follows from triangle inequality, the second step follows from the definition of  $g$ ,  
1808 the third step follows from Claim H.12.

1809 Therefore,

$$\begin{aligned} &\|x - x_S\|_T + \|x_S - x^*\|_T \\ &\leq (\|H(x - x_S)\|_T + \|g\|_T + O(\varepsilon))\|x^* - x_S\|_T + \|x_S - x^*\|_T \\ &\leq (\|H(x - x_S)\|_T + \|g\|_T + O(\varepsilon))\|x^* - x_S\|_T + \|x_S - x_{S^*}\|_T + \|x_{S^*} - x^*\|_T \\ &\leq (\|H(x - x_S)\|_T + \|g\|_T + O(\varepsilon))\|x^* - x_S\|_T + (1 + 2\varepsilon)\|H(x_S - x_{S^*})\|_T + \|x_{S^*} - x^*\|_T \\ &= \|g\|_T + O(\varepsilon)\|x^* - x_S\|_T + (1 + O(\varepsilon))(\|H(x - x_S)\|_T + \|H(x_S - x_{S^*})\|_T) + \|x_{S^*} - x^*\|_T \\ &\leq \|g\|_T + O(\varepsilon)\|x^* - x_S\|_T + (1 + O(\varepsilon))(\|H(x - x_S)\|_T + \|H(x_S - x_{S^*})\|_T) + (1 + \varepsilon)\mathcal{N}_1 \\ &\leq \|g\|_T + O(\varepsilon)\|x^* - x_S\|_T + (1 + O(\varepsilon))\sqrt{2}\sqrt{\|H(x - x_S)\|_T^2 + \|H(x_S - x_{S^*})\|_T^2} + (1 + \varepsilon)\mathcal{N}_1 \\ &\leq \|g\|_T + O(\varepsilon)\|x^* - x_S\|_T + (1 + O(\varepsilon))(1 + O(\sqrt{\varepsilon_2}))\sqrt{2}\|x - x_{S^*}\|_T + (1 + \varepsilon)\mathcal{N}_1 \\ &\leq \|g\|_T + O(\varepsilon)((1 + O(\sqrt{\varepsilon_2}))\|g\|_T + (2 + O(\sqrt{\varepsilon_2} + \varepsilon))\mathcal{N}_1) \\ &\quad + (1 + O(\varepsilon))(1 + O(\sqrt{\varepsilon_2}))\sqrt{2}\|x - x_{S^*}\|_T + (1 + \varepsilon)\mathcal{N}_1 \\ &\leq \|g\|_T + O(\varepsilon)((1 + O(\sqrt{\varepsilon_2}))\|g\|_T + (2 + O(\sqrt{\varepsilon_2} + \varepsilon))\mathcal{N}_1) \\ &\quad + (\sqrt{2} + O(\varepsilon + \sqrt{\varepsilon_2}))(\|g\|_T + (1 + \varepsilon)\mathcal{N}_1) + (1 + \varepsilon)\mathcal{N}_1 \\ &\leq (1 + \sqrt{2} + O(\sqrt{\varepsilon}))\|g\|_T + O(\sqrt{\delta})\|x^*\|_T, \end{aligned}$$

1810 where the first step follows from Lemma H.23, the second step follows from triangle inequality, the  
1811 third step follows from  $x_S - x_{S^*}$  being  $k$ -Fourier-sparse and Property VI of Lemma H.7, the forth  
1812 step change the order of the terms, the fifth step follows from Claim H.12, the sixth step follows  
1813 from  $\|H(x - x_S)\|_T + \|H(x_S - x_{S^*})\|_T \leq \sqrt{2}\sqrt{\|H(x - x_S)\|_T^2 + \|H(x_S - x_{S^*})\|_T^2}$ , the seventh  
1814 step follows from Lemma H.21, the eighth step follows from Eq. (49), the ninth step follows from  
1815 Eq. (50), the last step follows from  $\varepsilon = \varepsilon_0 = \varepsilon_1 = \varepsilon_2$ .  $\square$

1816 The following lemma shows that the recoverable signal  $x_S(t)$ 's energy is close to the observation  
1817 signal  $x(t)$ .

1818 **Lemma H.39** (Recoverable signal's energy). *Let  $x^*(t) = \sum_{j=1}^k v_j e^{2\pi i f_j t}$  and  $x(t) = x^*(t) + g(t)$   
1819 be our observable signal. Let  $\mathcal{N}_1^2 := \varepsilon_1(\|g(t)\|_T^2 + \delta\|x^*(t)\|_T^2)$ . Let  $C_1, \dots, C_l$  are the  $\mathcal{N}_1$ -heavy  
1820 clusters from Definition H.11. Let  $S^*$  denotes the set of frequencies  $f^* \in \{f_j\}_{j \in [k]}$  such that,  $f^* \in C_i$   
1821 for some  $i \in [l]$ , and*

$$\int_{C_i} |\widehat{x^* \cdot H}(f)|^2 df \geq T\mathcal{N}_1^2/k,$$

1822 *Let  $S$  denotes the set of frequencies  $f^* \in S^*$  such that,  $f^* \in C_j$  for some  $j \in [l]$ , and*

$$\int_{C_j} |\widehat{x \cdot H}(f)|^2 df \geq \varepsilon_2 T\mathcal{N}_1^2/k,$$

1823 *Then, we have that,*

$$\|x_S\|_T \lesssim \|g\|_T + \|x^*\|_T$$

1824 *Proof.* We have that,

$$\begin{aligned} \|x_S\|_T &\leq \|x_{S^*} - x^*\|_T + \|x_S - x_{S^*}\|_T + \|x^*\|_T \\ &\lesssim \|x_{S^*} - x^*\|_T + \|x - x_{S^*}\|_T + \|x^*\|_T \\ &\lesssim \|x_{S^*} - x^*\|_T + \|x - x^*\|_T + \|x^*\|_T \\ &\leq \|g\|_T + \|x^*\|_T, \end{aligned}$$

1825 where the first step follows from triangle inequality, the second step follows from Corollary H.22, the  
1826 third step follows from triangle inequality, the forth step follows from Claim H.12.  $\square$

## 1827 H.9 High SNR and recoverable signals

1828 **Lemma H.40** (High SNR and recoverable approximation error guarantee). *Let  $x^*(t) =$   
1829  $\sum_{j=1}^k v_j e^{2\pi i f_j t}$  and  $x(t) = x^*(t) + g(t)$  be our observable signal. Let  $\mathcal{N}_1^2 := \varepsilon_1(\|g(t)\|_T^2 +$   
1830  $\delta\|x^*(t)\|_T^2)$ . Let  $C_1, \dots, C_l$  are the  $\mathcal{N}_1$ -heavy clusters from Definition H.11. Let  $S^*$  denotes the set  
1831 of frequencies  $f^* \in \{f_j\}_{j \in [k]}$  such that,  $f^* \in C_i$  for some  $i \in [l]$ , and*

$$\int_{C_i} |\widehat{x^* \cdot H}(f)|^2 df \geq T\mathcal{N}_1^2/k,$$

1832 *Let  $S$  denotes the set of frequencies  $f^* \in S^*$  such that,  $f^* \in C_j$  for some  $j \in [l]$ , and*

$$\int_{C_j} |\widehat{x \cdot H}(f)|^2 df \geq \varepsilon_2 T\mathcal{N}_1^2/k,$$

1833 *And  $S_f$  is defined in Definition H.32. Then, we have that,*

$$\|x_{S_f} - x_S\|_T \leq (1 + O(\varepsilon)) \cdot \|g(t)\|_T \quad (51)$$

1834 *Proof.* We have that

$$S_f \subseteq S.$$

1835 And then for any  $f \in S \setminus S_f, j = h_{\sigma,b}(f)$ , we have that

$$\|(g \cdot H(t)) * G_{\sigma,b}^{(j)}(t)\|_T^2 \geq (1 - c \cdot \varepsilon) \|(x^* \cdot H(t)) * G_{\sigma,b}^{(j)}(t)\|_T^2$$

1836 where the first step follows from Definition H.32, the second step is from simple algebra.

1837 Let  $\mathcal{T} = S \setminus S_f$ . And for any  $j \in [B]$ , if  $j \in [B] \setminus S_g, \mathcal{T}_j = \{i \in S | h_{\sigma,b}(f_i) = j\}$ . Otherwise,

1838  $\mathcal{T}_j = \emptyset$ . Moreover, we have that for any  $f \in \text{supp}(\widehat{x_{\mathcal{T}_j}} * \widehat{H})$ ,

$$\widehat{G}_{\sigma,b}^{(j)}(f) \geq 1 - \frac{\delta}{k} \quad (52)$$

1839 From Property VI of Lemma H.7, we have that

$$\int_{-\infty}^{+\infty} |x^*(t) \cdot H(t)|^2 dt \in [1 - \varepsilon, 1] \cdot \int_{-\infty}^{+\infty} |x^*(t)|^2 dt. \quad (53)$$

1840 By Lemma H.29, we know that  $(x^* \cdot H) * G_{\sigma,b}^{(j)}$  always satisfies Property II (in Definition H.27):

$$\begin{aligned} & T \|x^*(t)H(t) * G_{\sigma,b}^{(j)}(t)\|_T^2 \\ &= \int_0^T |x^*(t)H(t) * G_{\sigma,b}^{(j)}(t)|^2 dt \\ &\geq (1 - \varepsilon_0) \int_{-\infty}^{+\infty} |x^*(t)H(t) * G_{\sigma,b}^{(j)}(t)|^2 dt \\ &= (1 - \varepsilon_0) \int_{-\infty}^{+\infty} |(\hat{x}^*(f) * \hat{H}(f)) * \hat{G}_{\sigma,b}^{(j)}(f)|^2 df \\ &= (1 - \varepsilon_0) \left( \int_{-\infty}^{+\infty} |(\hat{x}^*(f) * \hat{H}(f)) \cdot \hat{G}_{\sigma,b}^{(j)}(f)|^2 df + \int_{-\infty}^{+\infty} |(\hat{x}^*(f) * \hat{H}(f)) \cdot \hat{G}_{\sigma,b}^{(j)}(f)|^2 df \right) \\ &\geq (1 - \varepsilon_0) \cdot \int_{-\infty}^{+\infty} |(\hat{x}^*(f) * \hat{H}(f)) \cdot \hat{G}_{\sigma,b}^{(j)}(f)|^2 df \\ &\geq (1 - \varepsilon_0) \cdot \int_{-\infty}^{+\infty} |(\hat{x}^*(f) * \hat{H}(f))|^2 df \end{aligned} \quad (54)$$

1841 where the first step follows from the definition of the norm, the second step is from Lemma H.29,  
1842 the third step is due to Parseval's Theorem, the forth step is based on the Large Offset event not  
1843 happening, the fifth step is based on simple algebra, the last step is because of Lemma H.29.

1844 We also have that

$$\begin{aligned} & T \|x_{S_f}(t) - x_S(t)\|_T^2 \\ &= T \|x_{\mathcal{T}}\|_T^2 \\ &\leq (T/(1 - \varepsilon)^2) \cdot \|x_{\mathcal{T}}(t) \cdot H(t)\|_T^2 \\ &= \frac{1}{1 - \varepsilon^2} \cdot \int_0^T |x_{\mathcal{T}}(t) \cdot H(t)|^2 dt \\ &\leq \frac{1}{1 - \varepsilon^2} \cdot \int_{-\infty}^{\infty} |x_{\mathcal{T}}(t) \cdot H(t)|^2 dt \\ &= \frac{1}{1 - \varepsilon^2} \cdot \int_{-\infty}^{\infty} |\hat{x}_{\mathcal{T}}(f) * \hat{H}(f)|^2 df \\ &= \frac{1}{1 - \varepsilon^2} \cdot \sum_{j=1}^B \int_{-\infty}^{\infty} |\hat{x}_{\mathcal{T}_j}(f) * \hat{H}(f)|^2 df \\ &\leq \frac{k^2}{(1 - \varepsilon)^2(k - \delta)^2} \cdot \sum_{j \in B \setminus S_g} T \|(x^*(t) \cdot H(t)) * G_{\sigma,b}^{(j)}(t)\|_T^2 \\ &\leq \frac{k^2}{(1 - c\varepsilon)(1 - \varepsilon)^2(k - \delta)^2} \cdot \sum_{j \in B \setminus S_g} T \|(g(t) \cdot H(t)) * G_{\sigma,b}^{(j)}(t)\|_T^2 \end{aligned} \quad (55)$$

1845 where the first step follows from Definition of  $\mathcal{T}$ , the second step follows from Eq. (53), the third  
1846 step is based on definition of norm, the forth step follows from simple algebra, the fifth step follows  
1847 from Parseval's Theorem, the six step is due to Large Offset event not happening, the seventh step is  
1848 due to Lemma H.29, the eighth step follows from Eq. (51).

1849 In the following, we have that

$$\sum_{j \in [B]} T \cdot \|(g(t) \cdot H(t)) * G_{\sigma,b}^{(j)}(t)\|_T^2$$

$$\begin{aligned}
&\leq \sum_{j \in [B]} \int_0^T |(g^*(t) \cdot H(t)) * G_{\sigma,b}^{(j)}(t)|^2 dt \\
&\leq \sum_{j \in [B]} \int_{-\infty}^{\infty} |(g^*(t) \cdot H(t)) * G_{\sigma,b}^{(j)}(t)|^2 dt \\
&= \sum_{j \in [B]} \int_{-\infty}^{\infty} |(\widehat{g}(f) * \widehat{H}(f)) \cdot \widehat{G}_{\sigma,b}^{(j)}(f)|^2 df \\
&\leq \frac{k^2}{(k-\delta)^2} \int_{-\infty}^{\infty} |\widehat{g}(f) * \widehat{H}(f)|^2 df \\
&= \frac{k^2}{(k-\delta)^2} \cdot \int_{-\infty}^{\infty} |g(t) \cdot H(t)|^2 dt \\
&= \frac{k^2}{(k-\delta)^2} \cdot \int_0^T |g(t) \cdot H(t)|^2 dt \\
&\leq \frac{k^2}{(k-\delta)^2} \cdot \int_0^T |g(t)|^2 dt \\
&= T \frac{k^2}{(k-\delta)^2} \|g(t)\|_T^2
\end{aligned} \tag{56}$$

1850 where the first step is due to the definition of norm, the second step follows from  $g(t) = 0$  when  
1851  $t \notin [0, T]$ , the third step follows from Parseval's Theorem, the forth step is because of Lemma H.29,  
1852 the fifth step is from Parseval's Theorem, the sixth step is based on  $g(t) = 0$  when  $t \notin [0, T]$ , the  
1853 seventh step is from  $|H(t)|^2 \leq 1$ , the last step is from the definition of norm. We have that

$$\begin{aligned}
&T \|x_{S_f}(t) - x_S(t)\|_T^2 \\
&\leq \frac{k^2}{(1-c\varepsilon)(1-\varepsilon)^2(k-\delta)^2} \cdot \sum_{j \in B \setminus S_g} T \|(g^*(t) \cdot H(t)) * G_{\sigma,b}^{(j)}(t)\|_T^2 \\
&\leq \frac{k^2}{(1-c\varepsilon)(1-\varepsilon)^2(k-\delta)^2} \sum_{j \in [B]} T \|(g^*(t) \cdot H(t)) * G_{\sigma,b}^{(j)}(t)\|_T^2 \\
&\leq \frac{k^4}{(1-c\varepsilon)(1-\varepsilon)^2(k-\delta)^4} T \|g(t)\|_T^2 \\
&\leq (1 + O(\varepsilon)) T \|g(t)\|_T^2
\end{aligned}$$

1854 where the first step follows from Eq. (55), the second step follows from simple algebra, the third step  
1855 is due to Eq.(54), the forth step is because of the reason that  $\delta$  is much smaller than  $\varepsilon$  and  $\varepsilon < 1$ .  $\square$

1856 **Lemma H.41** (High SNR signal's energy). *Let  $x^*(t) = \sum_{j=1}^k v_j e^{2\pi i f_j t}$  and  $x(t) = x^*(t) + g(t)$   
1857 be our observable signal. Let  $\mathcal{N}_1^2 := \varepsilon_1 (\|g(t)\|_T^2 + \delta \|x^*(t)\|_T^2)$ . Let  $C_1, \dots, C_l$  are the  $\mathcal{N}_1$ -heavy  
1858 clusters from Definition H.11. Let  $S^*$  denotes the set of frequencies  $f^* \in \{f_j\}_{j \in [k]}$  such that,  $f^* \in C_i$   
1859 for some  $i \in [l]$ , and*

$$\int_{C_i} |\widehat{x^* \cdot H}(f)|^2 df \geq T \mathcal{N}_1^2 / k,$$

1860 Let  $S$  denotes the set of frequencies  $f^* \in S^*$  such that,  $f^* \in C_j$  for some  $j \in [l]$ , and

$$\int_{C_j} |\widehat{x \cdot H}(f)|^2 df \geq \varepsilon_2 T \mathcal{N}_1^2 / k,$$

1861 Let  $S_f$  be defined in Definition H.32. Then, we have that,

$$\|x_{S_f}\|_T \leq (1 + O(\varepsilon)) \|g\|_T + \|x^*\|_T$$

1862 *Proof.* We have that,

$$\begin{aligned}
\|x_{S_f}\|_T &\leq \|x_{S_f} - x_S\|_T + \|x_{S^*} - x^*\|_T + \|x_S - x_{S^*}\|_T + \|x^*\|_T \\
&\lesssim \|x_{S_f} - x_S\|_T + \|x_{S^*} - x^*\|_T + \|x - x_{S^*}\|_T + \|x^*\|_T \\
&\lesssim \|x_{S_f} - x_S\|_T + \|x_{S^*} - x^*\|_T + \|x - x^*\|_T + \|x^*\|_T \\
&\leq \|x_{S_f} - x_S\|_T + \|g\|_T + \|x^*\|_T \\
&\leq (1 + O(\varepsilon))\|g\|_T + \|x^*\|_T,
\end{aligned}$$

1863 where the first step follows from triangle inequality, the second step follows from Corollary H.22, the  
1864 third step follows from triangle inequality, the forth step follows from Claim H.12, where the last  
1865 step follows from Lemma H.40.  $\square$

#### 1866 **H.10** $(3 + \sqrt{2} + \varepsilon)$ -approximate algorithm

1867 In this section, we prove the main result: a  $(3 + \sqrt{2} + \varepsilon)$ -approximate Fourier interpolation algorithm,  
1868 which significantly improves the accuracy of Chen et al. (2016)'s result.

1869 **Theorem H.42** (Fourier interpolation with  $(3 + \sqrt{2} + \varepsilon)$ -approximation error). *Let  $x(t) = x^*(t) + g(t)$ ,  
1870 where  $x^*$  is  $k$ -Fourier-sparse signal with frequencies in  $[-F, F]$ . Given samples of  $x$  over  $[0, T]$  we  
1871 can output  $y(t)$  such that with probability at least  $1 - 2^{-\Omega(k)}$ ,*

$$\|y - x^*\|_T \leq (3 + \sqrt{2} + \varepsilon)\|g\|_T + \delta\|x^*\|_T.$$

1872 *Our algorithm uses  $\text{poly}(k, \varepsilon^{-1}, \log(1/\delta)) \log(FT)$  samples and  $\text{poly}(k, \varepsilon^{-1}, \log(1/\delta)) \cdot \log^2(FT)$   
1873 time. The output  $y$  is  $\text{poly}(k, \varepsilon^{-1}, \log(1/\delta))$ -Fourier-sparse signal.*

1874 *Proof.* Let  $\mathcal{N}_2^2 := \varepsilon_1 \varepsilon_2 (\|g(t)\|_T^2 + \delta\|x^*(t)\|_T^2)$ ,  $\mathcal{N}_1^2 := \varepsilon_1 (\|g(t)\|_T^2 + \delta\|x^*(t)\|_T^2)$  be the heavy  
1875 cluster parameter.

1876 First, by Lemma H.12, there is a set of frequencies  $S^* \subset [k]$  and  $x_{S^*}(t) = \sum_{j \in S^*} v_j e^{2\pi i f_j t}$  such that

$$\|x_{S^*} - x^*\|_T^2 \leq (1 + \varepsilon)\mathcal{N}_1^2. \quad (57)$$

1877 Furthermore, each  $f_j$  with  $j \in S^*$  belongs to an  $\mathcal{N}_1$ -heavy cluster  $C_j$  with respect to the filter  
1878 function  $H$  defined in Definition H.6.

1879 By Definition H.11 of heavy cluster, it holds that

$$\int_{C_j} |\widehat{H \cdot x^*}(f)|^2 df \geq T\mathcal{N}_1^2/k.$$

1880 By Definition H.11, we also have  $|C_j| \leq k \cdot \Delta_h$ , where  $\Delta_h$  is the bandwidth of  $\widehat{H}$ .

1881 Let  $\Delta \in \mathbb{R}_+$ , and  $\Delta > k \cdot \Delta_h$ , which implies that  $C_j \subseteq [f_j - \Delta, f_j + \Delta]$ . Thus, we have

$$\int_{f_j - \Delta}^{f_j + \Delta} |\widehat{H \cdot x^*}(f)|^2 df \geq T\mathcal{N}_1^2/k.$$

1882 By Corollary H.22, there is a set of frequencies  $S \subset S^*$  and  $x_S(t) = \sum_{j \in S} v_j e^{2\pi i f_j t}$  such that

$$\|x_S - x_{S^*}\|_T^2 \leq (1 + O(\sqrt{\varepsilon_2}))\|x - x_{S^*}\|_T^2.$$

1883 Let  $g' = x - x_{S^*}$ .

1884 In the following part, we will only focus on recovering the high SNR frequency. Let  $S_f$  be defined in  
1885 Definition H.32. It's to know  $S_f \subset S$  By applying Theorem H.37, there is an algorithm that outputs  
1886 a set of frequencies  $L \subset \mathbb{R}$  such that,  $|L| = O(k/(\varepsilon_0 \varepsilon_1 \varepsilon_2))$ , and with probability at least  $1 - 2^{-\Omega(k)}$ ,  
1887 for any  $f_j$  with  $j \in S_f$ , there is a  $\tilde{f} \in L$  such that,

$$|f_j - \tilde{f}| \lesssim \Delta \sqrt{\Delta T}.$$

1888 We define a map  $p : \mathbb{R} \rightarrow L$  as follows:

$$p(f) := \arg \min_{\tilde{f} \in L} |f - \tilde{f}| \quad \forall f \in \mathbb{R}.$$

1889 Then,  $x_S(t)$  can be expressed as

$$\begin{aligned} x_{S_f}(t) &= \sum_{j \in S_f} v_j e^{2\pi i f_j t} \\ &= \sum_{j \in S_f} v_j e^{2\pi i \cdot p(f_j) t} \cdot e^{2\pi i \cdot (f_j - p(f_j)) t} \\ &= \sum_{\tilde{f} \in L} e^{2\pi i \tilde{f} t} \cdot \sum_{j \in S_f : p(f_j) = \tilde{f}} v_j e^{2\pi i (f_j - \tilde{f}) t}, \end{aligned}$$

1890 where the first step follows from the definition of  $x_S(t)$ , the last step follows from interchanging the  
1891 summations.

1892 For each  $\tilde{f}_i \in L$ , by Corollary H.2 with  $x^* = x_S$ ,  $\Delta = \Delta\sqrt{\Delta T}$ , we have that there exist degree  
1893  $d = O(T\Delta\sqrt{\Delta T} + k^3 \log k + k \log 1/\delta)$  polynomials  $P_i(t)$  corresponding to  $\tilde{f}_i \in L$  such that,

$$\|x_{S_f}(t) - \sum_{\tilde{f}_i \in L} e^{2\pi i \tilde{f}_i t} P_i(t)\|_T \leq \sqrt{\delta} \|x_{S_f}(t)\|_T \quad (58)$$

1894 Define the following function family:

$$\mathcal{F} := \text{span} \left\{ e^{2\pi i \tilde{f} t} \cdot t^j \mid \forall \tilde{f} \in L, j \in \{0, 1, \dots, d\} \right\}.$$

1895 Note that  $\sum_{\tilde{f}_i \in L} e^{2\pi i \tilde{f}_i t} P_i(t) \in \mathcal{F}$ .

1896 By Claim H.16, for function family  $\mathcal{F}$ ,  $K_{\text{Uniform}[0, T]} = O((|L|d)^4 \log^3(|L|d))$ .

1897 By Lemma H.18, we have that, choosing a set  $W$  of  $O(\varepsilon^{-1} K_{\text{Uniform}[0, T]} \log(|L|d/\rho))$  i.i.d. samples  
1898 uniformly at random over duration  $[0, T]$  is a  $(\varepsilon, \rho)$ -WBSP.

1899 By Lemma H.19, there is an algorithm that runs in  $O(\varepsilon^{-1} |W| (|L|d)^{\omega-1} \log(1/\rho))$ -time using sam-  
1900 ples in  $W$ , and outputs  $y'(t) \in \mathcal{F}$  such that, with probability  $1 - \rho$ ,

$$\left\| y'(t) - \sum_{\tilde{f}_i \in L} e^{2\pi i \tilde{f}_i t} P_i(t) \right\|_T \leq (1 + \varepsilon) \left\| x(t) - \sum_{\tilde{f}_i \in L} e^{2\pi i \tilde{f}_i t} P_i(t) \right\|_T \quad (59)$$

1901 Then by Lemma H.3, we have that there is a  $(kd)$ -Fourier-sparse signal  $y(t)$ , such that

$$\|y - y'\|_T \leq \delta' \quad (60)$$

1902 where  $\delta' > 0$  is any positive real number, thus,  $y$  can be arbitrarily close to  $y'$ .

1903 Moreover, the sparsity of  $y(t)$  is

$$kd = kO(T\Delta\sqrt{\Delta T} + k^3 \log k + k \log 1/\delta) = \text{poly}(k, \varepsilon^{-1}, \log(1/\delta)).$$

1904 Therefore, the total approximation error can be upper bounded as follows:

$$\begin{aligned} &\|y - x^*\|_T \\ &\leq \|y - y'\|_T + \left\| y' - \sum_{\tilde{f}_i \in L} e^{2\pi i \tilde{f}_i t} P_i(t) \right\|_T + \left\| \sum_{\tilde{f}_i \in L} e^{2\pi i \tilde{f}_i t} P_i(t) - x^* \right\|_T \quad (\text{Triangle inequality}) \\ &\leq (1 + 0.1\varepsilon) \left\| y' - \sum_{\tilde{f}_i \in L} e^{2\pi i \tilde{f}_i t} P_i(t) \right\|_T + \left\| \sum_{\tilde{f}_i \in L} e^{2\pi i \tilde{f}_i t} P_i(t) - x^* \right\|_T \quad (\text{Eq. (60)}) \\ &\leq (1 + 2\varepsilon) \left\| x - \sum_{\tilde{f}_i \in L} e^{2\pi i \tilde{f}_i t} P_i(t) \right\|_T + \left\| \sum_{\tilde{f}_i \in L} e^{2\pi i \tilde{f}_i t} P_i(t) - x^* \right\|_T \quad (\text{Eq. (59)}) \end{aligned}$$

$$\begin{aligned}
&\leq (1+2\varepsilon)(\|x - x_{S_f}\|_T + \|x_{S_f} - x^*\|_T) + 2(1+2\varepsilon)\left\|\sum_{\tilde{f}_i \in L} e^{2\pi i \tilde{f}_i t} P_i(t) - x_{S_f}\right\|_T \\
&\quad \text{(Triangle Inequality)} \\
&\leq (1+2\varepsilon)(\|x - x_S\|_T + 2\|x_{S_f} - x_S\|_T + \|x_S - x^*\|_T) + 2(1+2\varepsilon)\left\|\sum_{\tilde{f}_i \in L} e^{2\pi i \tilde{f}_i t} P_i(t) - x_{S_f}\right\|_T \\
&\quad \text{(Triangle Inequality)} \\
&\leq (1+2\varepsilon)(\|x - x_S\|_T + \|x_S - x^*\|_T) + O(\sqrt{\delta})\|x_{S_f}(t)\|_T + 2(1+2\varepsilon)\|x_{S_f} - x_S\|_T \\
&\quad \text{(Eq. (58))} \\
&\leq (1+2\varepsilon)(1 + \sqrt{2} + O(\sqrt{\varepsilon}))\|g\|_T + O(\sqrt{\delta})\|x^*\|_T + O(\sqrt{\delta})\|x_{S_f}(t)\|_T + 2(1+2\varepsilon)\|x_{S_f} - x_S\|_T \\
&\quad \text{(Lemma H.38)} \\
&\leq (1+2\varepsilon)(1 + \sqrt{2} + O(\sqrt{\varepsilon}))\|g\|_T + O(\sqrt{\delta})\|x^*\|_T + O(\sqrt{\delta})(\|g\|_T + \|x^*\|_T) + 2(1+2\varepsilon)(1 + O(\varepsilon))\|g(t)\|_T \\
&\quad \text{(Lemma H.39)} \\
&\leq (3 + \sqrt{2} + O(\sqrt{\varepsilon}))\|g\|_T + O(\sqrt{\delta})\|x^*\|_T
\end{aligned}$$

By re-scaling  $\varepsilon$  and  $\delta$ , we prove the theorem.

□

## I Improving Band-Limited Interpolation Precision in a Smaller Range

In this section, we show that the approximation error of the Fourier interpolation algorithm developed in Section H can be further improved, if we only care about the signal in a shorter time duration  $[0, (1-c)T]$  for  $c \in (0, 1)$ . The main result of this section is Theorem I.4.

### I.1 Control noise

**Lemma I.1.** Let  $x^*(t) = \sum_{j=1}^k v_j e^{2\pi i f_j t}$  and  $x(t) = x^*(t) + g(t)$  be our observable signal. Let  $\mathcal{N}_1^2 := \varepsilon_1(\|g(t)\|_T^2 + \delta\|x^*(t)\|_T^2)$ . Let  $C_1, \dots, C_l$  are the  $\mathcal{N}_1$ -heavy clusters from Definition H.11. Let  $S^*$  denotes the set of frequencies  $f^* \in \{f_j\}_{j \in [k]}$  such that,  $f^* \in C_i$  for some  $i \in [l]$ , and

$$\int_{C_i} |\widehat{x^* \cdot H}(f)|^2 df \geq T\mathcal{N}_1^2/k,$$

Let  $S$  denotes the set of frequencies  $f^* \in S^*$  such that,  $f^* \in C_j$  for some  $j \in [l]$ , and

$$\int_{C_j} |\widehat{x \cdot H}(f)|^2 df \geq \varepsilon_2 T\mathcal{N}_1^2/k,$$

Then, we have that,

$$\|x - x_S\|_{T'} + \|x_S - x^*\|_{T'} \leq (\sqrt{2} + O(\sqrt{\varepsilon} + c))\|g\|_T + O(\sqrt{\delta})\|x^*\|_T.$$

*Proof.* Following from the fact that  $\sqrt{1+\varepsilon} = 1 + O(\varepsilon)$  for  $\varepsilon < 1$ , we have

$$\mathcal{N}_1 = \sqrt{\varepsilon_1(\|g\|_T^2 + \delta\|x^*\|_T^2)} \leq \sqrt{\varepsilon_1}\|g\|_T + \sqrt{\delta\varepsilon_1}\|x^*\|_T.$$

We have that

$$\begin{aligned}
\|x - x_{S^*}\|_T &\leq \|x - x^*\|_T + \|x^* - x_{S^*}\|_T \\
&\leq \|g\|_T + \|x^* - x_{S^*}\|_T \\
&\leq \|g\|_T + (1 + \varepsilon)\mathcal{N}_1,
\end{aligned} \tag{61}$$

where the first step follows from triangle inequality, the second step follows the definition of  $g$ , the third step follows from Claim H.12.

1920 Therefore,

$$\begin{aligned}
& \|x - x_S\|_{T'} + \|x_S - x^*\|_{T'} \\
& \leq \|x - x_S\|_{T'} + \|x_S - x_{S^*}\|_{T'} + \|x_{S^*} - x^*\|_{T'} \\
& \leq \|x - x_S\|_{T'} + \|x_S - x_{S^*}\|_{T'} + (1 + 2c)\|x_{S^*} - x^*\|_{T'} \\
& \leq (1 + 2\delta)\|H(x - x_S)\|_{T'} + (1 + 2\delta)\|H(x_S - x_{S^*})\|_{T'} + (1 + 2c)\|x_{S^*} - x^*\|_T \\
& \leq (1 + O(\delta))(1 + 2c)(\|H(x - x_S)\|_T + \|H(x_S - x_{S^*})\|_T) + (1 + \varepsilon)(1 + O(c))\mathcal{N}_1 \\
& \leq (1 + O(\delta))(1 + 2c)\sqrt{2}\sqrt{\|H(x - x_S)\|_T^2 + \|H(x_S - x_{S^*})\|_T^2} + (1 + \varepsilon)(1 + O(c))\mathcal{N}_1 \\
& \leq (1 + O(\delta))(1 + O(\sqrt{\varepsilon_2}))(1 + O(c))\sqrt{2}\|x - x_{S^*}\|_T + (1 + \varepsilon)(1 + O(c))\mathcal{N}_1 \\
& \leq (\sqrt{2} + O(\delta + \sqrt{\varepsilon_2} + c))(\|g\|_T + (1 + \varepsilon)\mathcal{N}_1) + (1 + \varepsilon)(1 + O(c))\mathcal{N}_1 \\
& \leq (\sqrt{2} + O(\sqrt{\varepsilon} + c))\|g\|_T + O(\sqrt{\delta})\|x^*\|_T,
\end{aligned}$$

1921 where the first step follows from triangle inequality, the second step follows from for any function  
1922  $x : \mathbb{R} \rightarrow \mathbb{C}$ ,  $(1 - c)\|x\|_{T'} \leq \|x\|_T$ , the third step follows from Property I of Lemma H.7 and  
1923  $(1 - c)/2 < (\frac{1}{2} - \frac{2}{s_1})s_3$ , the forth step follows from Claim H.12, the fifth step follows from  
1924  $\|H(x - x_S)\|_T + \|H(x_S - x_{S^*})\|_T \leq \sqrt{2}\sqrt{\|H(x - x_S)\|_T^2 + \|H(x_S - x_{S^*})\|_T^2}$ , the sixth step  
1925 follows from Lemma H.21, the seventh step follows from Eq. (49), the last step follows from  
1926  $\varepsilon = \varepsilon_0 = \varepsilon_1 = \varepsilon_2$ .  $\square$

1927 **Parameters setting** By Section C.3 in Chen et al. (2016), we choose parameters for filter function  
1928  $(H(t), \hat{H}(f))$  as follows:

- 1929 • By Eq. (19) in the proof of Property VI of filter function  $(H(t), \hat{H}(f))$ , we need  $(1 - s_3(1 - \frac{2}{s_1})) \cdot \tilde{O}(k^4) \leq \varepsilon$ , thus we have that  $\min(\frac{1}{1-s_3}, s_1) \geq \tilde{O}(k^4)/\varepsilon$ .
- 1930
- 1931 • In the proof of Property V of filter function  $(H(t), \hat{H}(f))$ , we set  $\ell \gtrsim k \log(k/\delta)$ .
- 1932 • In the proof of Lemma I.1, we set  $(1 - c)/2 < (\frac{1}{2} - \frac{2}{s_1})s_3$ . Thus, we have that  $\min(s_3, 1 - \frac{4}{s_1}) \geq 1 - \frac{c}{2}$  or equivalently  $\min(\frac{1}{1-s_3}, s_1/4) \geq \frac{2}{c}$ .
- 1933
- 1934 •  $\Delta_h$  is determined by the parameters of filter  $(H(t), \hat{H}(f))$  in Eq. (20):  
1935  $\Delta_h \asymp \frac{s_1 \ell}{s_3 T}$ . Combining the setting of  $s_1, s_3, \ell$ , we should set  $\Delta_h \geq$   
1936  $\max(\tilde{O}(k^5 \log(1/\delta))/(\varepsilon T), O(k \log(k/\delta)/(cT)))$ .

## 1937 I.2 $(\sqrt{2} + \varepsilon)$ -approximation ratio

1938 **Corollary I.2** (Corollary of Theorem H.37). *Let  $x^*(t) = \sum_{j=1}^k v_j e^{2\pi i f_j t}$  and  $x(t) = x^*(t) + g(t)$   
1939 be our observable signal where  $\|g(t)\|_T^2 \leq c_0 \|x^*(t)\|_T^2$  for a sufficiently small constant  $c_0$ . Then  
1940 Procedure FREQUENCYRECOVERYKCLUSTER returns a set  $L$  of  $O(k/(\varepsilon_0 \varepsilon_1 \varepsilon_2))$  frequencies that  
1941 covers all  $\mathcal{N}_2$ -heavy clusters of  $x^*$ , which uses  $\text{poly}(k, c^{-1}, \varepsilon^{-1}, \varepsilon_0^{-1}, \varepsilon_1^{-1}, \varepsilon_2^{-1}, \log(1/\delta)) \log(FT)$   
1942 samples and  $\text{poly}(k, c^{-1}, \varepsilon^{-1}, \varepsilon_0^{-1}, \varepsilon_1^{-1}, \varepsilon_2^{-1}, \log(1/\delta)) \log^2(FT)$  time.*

1943 *In particular, for  $\Delta_0 = c^{-1} \varepsilon^{-1} \text{poly}(k, \log(1/\delta))/T$  and  $\mathcal{N}_2^2 := \varepsilon_1 \varepsilon_2 (\|g(t)\|_T^2 + \delta \|x^*(t)\|_T^2)$ , with  
1944 probability  $1 - 2^{-\Omega(k)}$ , for any  $f^*$  with*

$$\int_{f^* - \Delta}^{f^* + \Delta} |\widehat{x \cdot H}(f)|^2 df \geq T \mathcal{N}_2^2 / k, \quad (62)$$

1945 there exists an  $\tilde{f} \in L$  satisfying

$$|f^* - \tilde{f}| \lesssim \Delta_0 \sqrt{\Delta_0 T}.$$

1946 **Remark I.3.** The proof is similar with the proof of Theorem H.37.

1947 **Theorem I.4**  $((\sqrt{2} + \varepsilon)$ -approximate Fourier interpolation algorithm with shrinking range). *Let  
1948  $x(t) = x^*(t) + g(t)$ , where  $x^*$  is  $k$ -Fourier-sparse signal with frequencies in  $[-F, F]$ . Let  $T' =$*



1949  $T(1 - c)$ . Given samples of  $x$  over  $[0, T]$ , we can output  $y(t)$  such that with probability at least  
 1950  $1 - 2^{-\Omega(k)}$ ,

$$\|y - x^*\|_{T'} \leq (\sqrt{2} + \varepsilon + c)\|g\|_T + \delta\|x^*\|_T.$$

1951 Our algorithm uses  $\text{poly}(k, \varepsilon^{-1}, c^{-1}, \log(1/\delta)) \log(FT)$  samples and  $\text{poly}(k, \varepsilon^{-1}, c^{-1}, \log(1/\delta)) \cdot$   
 1952  $\log^2(FT)$  time. The output  $y$  is  $\text{poly}(k, \varepsilon^{-1}, c^{-1}, \log(1/\delta))$ -Fourier-sparse signal.

1953 *Proof.* Let  $\mathcal{N}_1^2 := \varepsilon_1(\|g(t)\|_T^2 + \delta\|x^*(t)\|_T^2)$  be the heavy cluster parameter.

1954 First, by Lemma H.12, there is a set of frequencies  $S^* \subset [k]$  and  $x_{S^*}(t) = \sum_{j \in S^*} v_j e^{2\pi i f_j t}$  such that

$$\|x_{S^*} - x^*\|_T^2 \leq (1 + \varepsilon)\mathcal{N}_1^2. \quad (63)$$

1955 Furthermore, each  $f_j$  with  $j \in S$  belongs to an  $\mathcal{N}_1$ -heavy cluster  $C_j$  with respect to the filter function  
 1956  $H$  defined in Definition H.6.

1957 By Definition H.11 of heavy cluster, it holds that

$$\int_{C_j} |\widehat{H \cdot x^*}(f)|^2 df \geq T\mathcal{N}_1^2/k.$$

1958 By Definition H.11, we also have  $|C_j| \leq k \cdot \Delta_h$ , where  $\Delta_h$  is the bandwidth of  $\widehat{H}$ .

1959 Let  $\Delta \in \mathbb{R}_+$ , and  $\Delta > k \cdot \Delta_h$ , which implies that  $C_j \subseteq [f_j - \Delta, f_j + \Delta]$ . Thus, we have

$$\int_{f_j - \Delta}^{f_j + \Delta} |\widehat{H \cdot x^*}(f)|^2 df \geq T\mathcal{N}_1^2/k.$$

1960 By Corollary H.22, there is a set of frequencies  $S \subset S^*$  and  $x_S(t) = \sum_{j \in S} v_j e^{2\pi i f_j t}$  such that

$$\|x_S - x_{S^*}\|_T^2 \leq (1 + O(\sqrt{\varepsilon_2}))\|x - x_{S^*}\|_T^2.$$

1961 Let  $g' = x - x_{S^*}$ .

1962 Now it is enough to recover only  $x_S$ , instead of  $x^*$ .

1963 By applying Theorem I.2, there is an algorithm that outputs a set of frequencies  $L \subset \mathbb{R}$  such that,  
 1964  $|L| = O(k/(\varepsilon_0 \varepsilon_1 \varepsilon_2))$ , and with probability at least  $1 - 2^{-\Omega(k)}$ , for any  $f_j$  with  $j \in S$ , there is a  
 1965  $\tilde{f} \in L$  such that,

$$|f_j - \tilde{f}| \lesssim \Delta \sqrt{\Delta T}.$$

1966 We define a map  $p : \mathbb{R} \rightarrow L$  as follows:

$$p(f) := \arg \min_{\tilde{f} \in L} |f - \tilde{f}| \quad \forall f \in \mathbb{R}.$$

1967 Then,  $x_S(t)$  can be expressed as

$$\begin{aligned} x_S(t) &= \sum_{j \in S} v_j e^{2\pi i f_j t} \\ &= \sum_{j \in S} v_j e^{2\pi i p(f_j) t} \cdot e^{2\pi i (f_j - p(f_j)) t} \\ &= \sum_{\tilde{f} \in L} e^{2\pi i \tilde{f} t} \cdot \sum_{j \in S: p(f_j) = \tilde{f}} v_j e^{2\pi i (f_j - \tilde{f}) t}, \end{aligned}$$

1968 where the first step follows from the definition of  $x_S(t)$ , the last step follows from interchanging the  
 1969 summations.

1970 For each  $\tilde{f}_i \in L$ , by Corollary H.2 with  $x^* = x_S$ ,  $\Delta = \Delta \sqrt{\Delta T}$ , we have that there exist degree  
 1971  $d = O(T\Delta \sqrt{\Delta T} + k^3 \log k + k \log 1/\delta)$  polynomials  $P_i(t)$  corresponding to  $\tilde{f}_i \in L$  such that,

$$\|x_S(t) - \sum_{\tilde{f}_i \in L} e^{2\pi i \tilde{f}_i t} P_i(t)\|_T \leq \delta \|x_S(t)\|_T \quad (64)$$

1972 Define the following function family:

$$\mathcal{F} := \text{span} \left\{ e^{2\pi i \tilde{f} t} \cdot t^j \mid \forall \tilde{f} \in L, j \in \{0, 1, \dots, d\} \right\}.$$

1973 Note that  $\sum_{\tilde{f}_i \in L} e^{2\pi i \tilde{f}_i t} P_i(t) \in \mathcal{F}$ .

1974 By Claim H.16, for function family  $\mathcal{F}$ ,  $K_{\text{Uniform}[cT/2, T(1-c/2)]} = O((|L|d)^4 \log^3(|L|d))$ .

1975 By Lemma H.18, we have that, choosing a set  $W$  of  $O(\varepsilon^{-1} K_{\text{Uniform}[cT/2, T(1-c/2)]} \log(|L|d/\rho))$   
 1976 i.i.d. samples uniformly at random over duration  $[0, T]$  is a  $(\varepsilon, \rho)$ -WBSP.

1977 By Lemma H.19, there is an algorithm that runs in  $O(\varepsilon^{-1} |W|(|L|d)^{\omega-1} \log(1/\rho))$ -time using sam-  
 1978 ples in  $W$ , and outputs  $y'(t) \in \mathcal{F}$  such that, with probability  $1 - \rho$ ,

$$\|y'(t) - \sum_{\tilde{f}_i \in L} e^{2\pi i \tilde{f}_i t} P_i(t)\|_{T'} \leq (1 + \varepsilon) \|x(t) - \sum_{\tilde{f}_i \in L} e^{2\pi i \tilde{f}_i t} P_i(t)\|_{T'} \quad (65)$$

1979 Then by Lemma H.3, we have that there is a  $O(kd)$ -Fourier-sparse signal  $y(t)$ , such that

$$\|y(t) - y'(t)\|_{T'} \leq \delta' \quad (66)$$

1980 where  $\delta' > 0$  is any positive real number. Thus,  $y$  can be arbitrarily close to  $y'$ .

1981 Moreover, the sparsity of  $y(t)$  is  $kd = kO(T\Delta\sqrt{\Delta T} + k^3 \log k + k \log 1/\delta) =$   
 1982  $\text{poly}(k, \varepsilon^{-1}, c^{-1}, \log(1/\delta))$ .

1983 Therefore, the total approximation error can be upper bounded as follows:

$$\begin{aligned} & \|y - x^*\|_{T'} \\ & \leq \|y - y'\|_{T'} + \left\| y - \sum_{\tilde{f}_i \in L} e^{2\pi i \tilde{f}_i t} P_i(t) \right\|_{T'} + \left\| \sum_{\tilde{f}_i \in L} e^{2\pi i \tilde{f}_i t} P_i(t) - x^* \right\|_{T'} \\ & \leq (1 + 0.1\varepsilon) \left\| y - \sum_{\tilde{f}_i \in L} e^{2\pi i \tilde{f}_i t} P_i(t) \right\|_{T'} + \left\| \sum_{\tilde{f}_i \in L} e^{2\pi i \tilde{f}_i t} P_i(t) - x^* \right\|_{T'} \\ & \leq (1 + 2\varepsilon) \left\| x - \sum_{\tilde{f}_i \in L} e^{2\pi i \tilde{f}_i t} P_i(t) \right\|_{T'} + \left\| \sum_{\tilde{f}_i \in L} e^{2\pi i \tilde{f}_i t} P_i(t) - x^* \right\|_{T'} \\ & \leq (1 + 2\varepsilon) (\|x - x_S\|_{T'} + \|x_S - x^*\|_{T'}) + 2(1 + \varepsilon) \|x_S - \sum_{\tilde{f}_i \in L} e^{2\pi i \tilde{f}_i t} P_i(t)\|_{T'} \\ & \leq (1 + 2\varepsilon) (\|x - x_S\|_{T'} + \|x_S - x^*\|_{T'}) + O(\delta) \|x_S(t)\|_T \\ & \leq (1 + 2\varepsilon) (\sqrt{2} + O(\sqrt{\varepsilon} + c)) \|g\|_T + O(\sqrt{\delta}) \|x^*\|_T + O(\delta) \|x_S(t)\|_T \\ & \leq (1 + 2\varepsilon) (\sqrt{2} + O(\sqrt{\varepsilon} + c)) \|g\|_T + O(\sqrt{\delta}) \|x^*\|_T + O(\delta) (\|g\|_T + \|x^*\|_T) \\ & \leq (\sqrt{2} + O(\sqrt{\varepsilon} + c)) \|g\|_T + O(\sqrt{\delta}) \|x^*\|_T, \end{aligned}$$

1984 where the first step follows from triangle inequality, the second step follows from Eq. (66), the third  
 1985 step follows from Eq. (65), the forth step follows from Triangle Inequality again, the fifth step follows  
 1986 from Eq. (64), the sixth step follows from Lemma I.1, the seventh step follows from Lemma H.39,  
 1987 and the last step is straightforward.

1988 By re-scaling  $\varepsilon$  and  $\delta$ , we prove the theorem.

1989 □

## 1990 J Broader Impact

1991 By cutting the approximation constant from  $\sim 100$  to  $3 + \sqrt{2}$ , our methods could materially shorten  
 1992 scan times in MRI, reduce power consumption in compressive sensing devices, and improve fidelity  
 1993 in spectrum-sparse communication systems, thus benefiting healthcare, environmental monitoring,

1994 and data transmission. At the same time, higher-quality reconstructions from fewer samples may  
1995 amplify surveillance capabilities or aid in generating convincingly doctored audio/video; responsible  
1996 adoption therefore demands privacy safeguards, transparent validation on non-ideal data, and ethical  
1997 oversight whenever the technology is applied to sensitive domains.
